# Supplementary material for: Enantioselective electrosynthesis of inherently chiral calix[4]arenes via a cobalt-catalyzed aryl C–H acyloxylation
Source: Royal Society of Chemistry journal article supplement (doi:10.1039/d4gc02877e), 2024-01-01

## Supporting information

Enantioselective Electrosynthesis of Inherently Chiral Calix[4]arenes via a Cobalt-Catalyzed Aryl C-H Acyloxylation

Liming Zhang,<sup>†</sup> Chen Yang,<sup>†</sup> Xinhai Wang, Taixin Yang, Dandan Yang, Yingchao Dou\* & Jun-Long Niu\*

<sup>†</sup>L. Zhang and C. Yang, contributed equally to this work.

College of Chemistry, Pingyuan Laboratory, Zhengzhou University, 450001, Henan, P. R. China

Email: yingchaodou@zzu.edu.cn; niujunlong@zzu.edu.cn

## Contents

|                                                                                               |           |
|-----------------------------------------------------------------------------------------------|-----------|
| <b>1. GENERAL INFORMATION .....</b>                                                           | <b>3</b>  |
| <b>2. EXPERIMENTAL PROCEDURES .....</b>                                                       | <b>4</b>  |
| 2.1 PREPARATION OF SUBSTRATES .....                                                           | 4         |
| 2.2 EXPERIMENTAL PROCEDURES OF ELECTROLYSIS .....                                             | 5         |
| <b>3. OPTIMIZATION OF REACTION CONDITIONS .....</b>                                           | <b>6</b>  |
| 3.1 SCREENING OF THE LIGANDS .....                                                            | 6         |
| 3.2 SCREENING OF THE SOLVENTS .....                                                           | 7         |
| 3.3 SCREENING OF THE ADDITIVES .....                                                          | 8         |
| 3.4 SCREENING OF THE COBALT SALTS.....                                                        | 9         |
| 3.5 SCREENING OF THE CURRENT .....                                                            | 10        |
| 3.6 SCREENING OF THE REACTION TIME AND TEMPERATURE .....                                      | 11        |
| 3.7 SCREENING OF THE DOSAGES OF CATALYSTS AND LIGANDS .....                                   | 12        |
| 3.8 SCREENING OF THE ELECTRODE MATERIALS .....                                                | 13        |
| <b>4. MECHANISTIC STUDIES .....</b>                                                           | <b>14</b> |
| 4.1 NON-LINEAR EFFECT STUDIES .....                                                           | 14        |
| 4.2 DYNAMIC ELECTRODE POTENTIAL ANALYSIS .....                                                | 14        |
| 4.3 CYCLIC VOLTAMMETRY STUDIES.....                                                           | 14        |
| <b>5. APPLICATION STUDIES .....</b>                                                           | <b>15</b> |
| <b>6. X-RAY DIFFRACTION ANALYSIS.....</b>                                                     | <b>16</b> |
| <b>7. NMR DATA OF THE ACYLOXYLATED INHERENTLY CHIRAL CALIX[4]ARENES .....</b>                 | <b>18</b> |
| <b>8. COPIES OF NMR SPECTRA OF THE ACYLOXYLATED INHERENTLY CHIRAL<br/>CALIX[4]ARENES.....</b> | <b>48</b> |

## 1. General information

The commercial reagent-grade chemicals were used directly without further treatment unless noted. The reactions were carried out in commercially available analytical solvents under air atmosphere unless otherwise noted, and monitored with analytical thin-layer chromatography (TLC) on silica gel 60 F254 plates and visualized under UV (254nm, 365nm). The purifications were implemented by flash column chromatography on silica gel (200-300 mesh) as stationary phase.

NMR spectra were recorded on Bruker Avance 400 (400 MHz for  $^1\text{H}$  and 100 MHz for  $^{13}\text{C}$ ) and Bruker Avance 600 (600 MHz for  $^1\text{H}$ , 564 MHz for  $^{19}\text{F}$  and 150 MHz for  $^{13}\text{C}$ ) spectrometers at 295 K. Chemical shifts were reported in part per million relative to residual peak ( $\text{CDCl}_3$ :  $^1\text{H}$   $\delta$  7.26 ppm,  $^{13}\text{C}$   $\delta$  77.16 ppm;  $\text{DMSO-}d_6$ :  $^1\text{H}$   $\delta$  2.50 ppm,  $^{13}\text{C}$   $\delta$  39.52 ppm;  $\text{CD}_3\text{OD}$ :  $^1\text{H}$   $\delta$  3.31 ppm,  $^{13}\text{C}$   $\delta$  49.00 ppm). The mentioned abbreviations are as follows: s (singlet), d (doublet), t (triplet), q (quartet), m (multiplet), br (broad). The melting points were measured on a WC-1 instrument. The cyclic voltammetry analysis was conducted on an electrochemical workstation (CHI 760E). The enantiomeric excess (ee) of the products were measured by high-performance liquid chromatography (Agilent 1260 Infinity LC instrument) equipped with chiral columns (Daicel chiral technologies, China). High-Resolution mass spectra (HRMS) were measured on a Waters ACQUITYUPLC 1-Class PLUS liquid chromatogram coupled with a Waters Xevo G2-XS QToF mass spectrometer. The single crystal diffraction was performed on the Oxford (Agilent Gemini E, USA) X-ray diffractometer. The specific rotations were measured on a WZZ-3A polarimeter.

## 2. Experimental procedures

### 2.1 Preparation of substrates

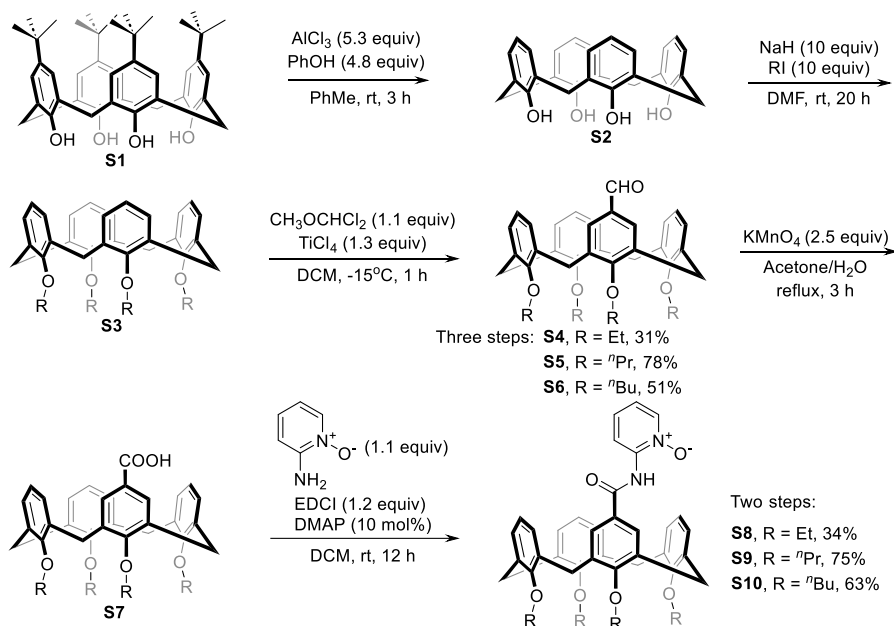

To a solution of compound **S1** (25 g, 38.5 mmol) and phenol (4.8 equiv) in toluene (250 mL) was added  $\text{AlCl}_3$  (5.3 equiv) within 10 minutes at room temperature. The mixture was stirred at this temperature for 3-5 h until **S1** was totally consumed detected by TLC. The reaction was quenched by addition of 0.2 M  $\text{HCl}$ , leading to white precipitate as the good product **S2**. After filtration, the filtrate was extracted with ethyl acetate. The organic phase was concentrated to remove 80 % of the solvent under reduced pressure, giving a white precipitate as the good product **S2**.

To a solution of **S2** in  $\text{DMF}$  (250 mL) was added  $\text{NaH}$  (10 equiv) within 20 minutes in an ice-water bath. After stirring at this temperature for 1 h, the alkyl halides (10 equiv) were added dropwise. Then the mixture was stirred at room temperature for 20 h, following by quenching with 1 M  $\text{HCl}$ . The pH value was adjusted to 1-2 with 1 M  $\text{HCl}$ . The resulting white precipitate was collected by filtration, leading to a white powder as the good product **S3**.

To a solution of the obtained white powder in anhydrous  $\text{CH}_2\text{Cl}_2$  was added 1,1-dichloromethyl ether (1.1 equiv) at  $-15^\circ\text{C}$  under  $\text{Ar}$  atmosphere. Then the reaction was stirred at this temperature for 30 minutes, followed by the slow addition of  $\text{TiCl}_4$  (1.3 equiv). Subsequently, the mixture was stirred at  $-10^\circ\text{C}$  for 1-1.5 h until the total consumption of the starting material monitored by TLC. The reaction was quenched by slow addition of water. The resulting mixture was extracted with ethyl acetate. The organic phase was collected and concentrated on a rotovap under reduced pressure to give a residue, which was purified by flash column chromatography

(petroleum ether/ethyl ether = 20/1), leading to the desired compound as a yellow solid, **S4** (R = Et), **S5** (R = <sup>n</sup>Pr), **S6** ((R = <sup>n</sup>Bu).

To a solution of the yellow solid in acetone (100 mL) was added the aqueous of KMnO<sub>4</sub> (2.5 equiv). The reaction was refluxed in an oil bath (105 °C) for 3-5 h. After dilution with ethyl acetate, the pH value was adjusted to 1-2 with 1 M HCl. Then the mixture was extracted with ethyl acetate. The organic phase was collected and concentrated under reduced pressure, leading to the good product as a yellow solid (**S7**).

To a solution of the acid in CH<sub>2</sub>Cl<sub>2</sub> (40 mL) was added 2-pyridinamine 1-oxide (1.1 equiv), DMAP (0.1 equiv), EDCI (1.2 equiv). The reaction was stirred at room temperature for 12 h. Then the mixture was extracted with ethyl acetate and washed with Na<sub>2</sub>CO<sub>3</sub> aqueous solution. The organic phase was concentrated under reduced pressure. The residue was purified by flash column chromatography, leading to the final product as a white solid, **S8** (R = Et), **S9** (R = <sup>n</sup>Pr), **S10** ((R = <sup>n</sup>Bu).

## 2.2 Experimental procedures of electrolysis

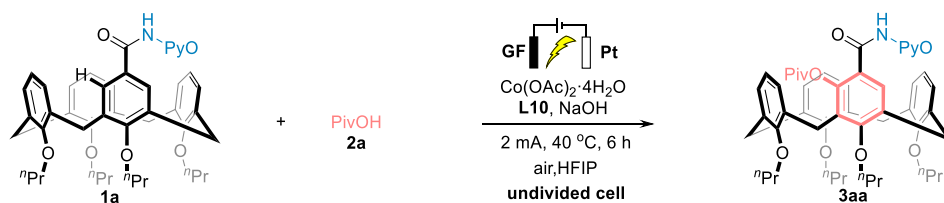

The electrolysis of **1a** and **2a** leading to **3aa** was set as the template reaction.

To a flask (30 mL) was added **1a** (0.1 mmol), Co(OAc)<sub>2</sub>·4H<sub>2</sub>O (10 mol%), L10 (20 mol%), NaOH (2 equiv), pivalic acid (2 equiv) and hexafluoroisopropanol (5 mL). It was then equipped with a graphite anode (15 mm×10 mm×6 mm) and a platinum cathode (10 mm×10 mm×0.1 mm) in an undivided cell. The reaction was conducted at a constant current model (2 mA) and stirred at 40 °C for 6 h. After the total consumption of **1a** monitored by TLC, the reaction was diluted with CH<sub>2</sub>Cl<sub>2</sub> and washed with NaHCO<sub>3</sub> aqueous solution. The organic phase was concentrated under reduced pressure to give a residue, which was purified by flash column chromatography to furnish the desired product **3aa**.

### 3. Optimization of reaction conditions

#### 3.1 Screening of the ligands

Table S1. Screening of the ligands<sup>a,b</sup>

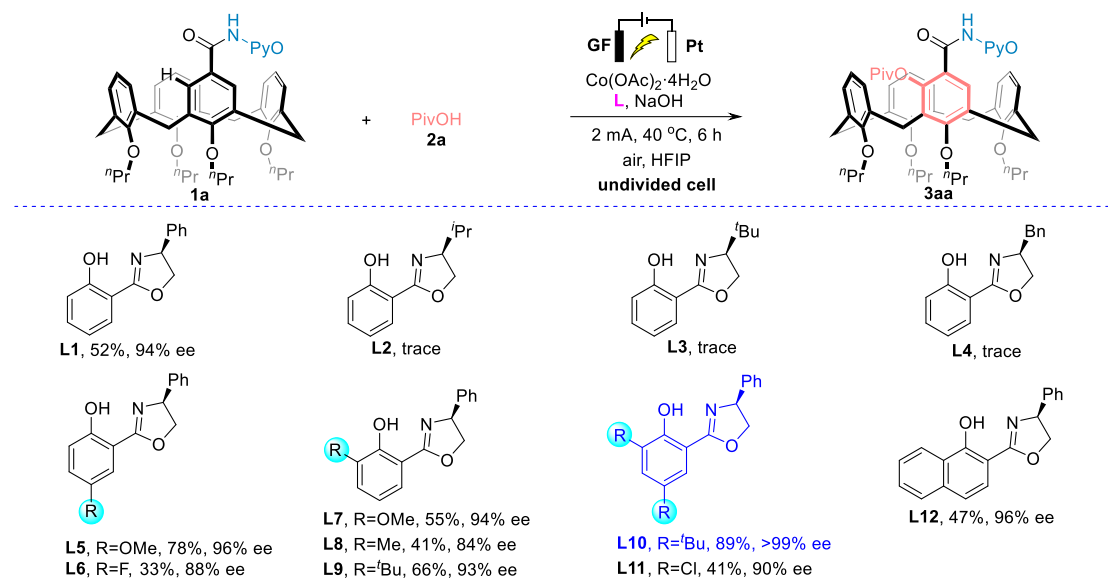

<sup>a</sup>Undivided cell, GF anode (15 mm × 10 mm × 6 mm submerged), platinum plated cathode (10 mm × 10 mm × 0.1 mm submerged), constant current of 2 mA; isolated yields are indicated; ee values were determined by chiral HPLC analysis.

<sup>b</sup>**1a** (0.1 mmol), **2a** (0.2 mmol),  $\text{Co}(\text{OAc})_2 \cdot 4\text{H}_2\text{O}$  (10 mol%), **Ligand** (20 mol%), NaOH (2 equiv), 40 °C, 6 h, air, HFIP (5 mL).

### 3.2 Screening of the solvents

**Table S2.** Screening of the solvents<sup>a,b</sup>

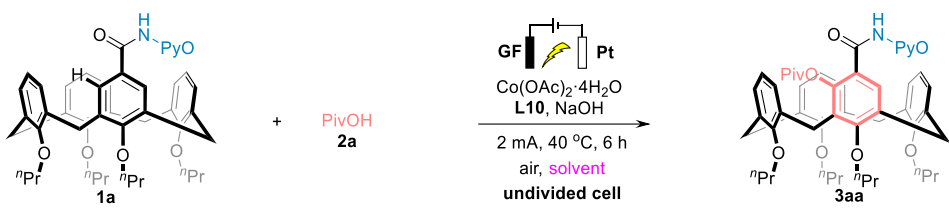

| Entry | Solvents                                    | Yield (%) | ee (%) |
|-------|---------------------------------------------|-----------|--------|
| 1     | CH <sub>3</sub> OH                          | Trace     | -      |
| 2     | EtOH                                        | Trace     | -      |
| 3     | TFE                                         | Trace     | -      |
| 4     | IPrOH                                       | Trace     | -      |
| 5     | HFIP                                        | 89        | >99    |
| 6     | CH <sub>2</sub> Cl <sub>2</sub>             | Trace     | -      |
| 7     | CH <sub>3</sub> CN                          | 45        | 78     |
| 8     | Acetone                                     | Trace     | -      |
| 9     | Ethyl acetate                               | Trace     | -      |
| 10    | DMF                                         | Trace     | -      |
| 11    | EA:HFIP = 1:5                               | 61        | 91     |
| 12    | Acetone:HFIP = 1:5                          | Trace     | -      |
| 13    | CH <sub>2</sub> Cl <sub>2</sub> :HFIP = 1:5 | 57        | 93     |
| 14    | CH <sub>3</sub> CN:HFIP = 1:5               | Trace     | -      |

<sup>a</sup>Undivided cell, GF anode (15 mm × 10 mm × 6 mm submerged), platinum plated cathode (10 mm × 10 mm × 0.1 mm submerged), constant current of 2 mA; isolated yields are indicated; ee values were determined by chiral HPLC analysis.

<sup>b</sup>**1a** (0.1 mmol), **2a** (0.2 mmol), Co(OAc)<sub>2</sub>·4H<sub>2</sub>O (10 mol%), **L10** (20 mol%), NaOH (2 equiv), 40 °C, 6 h, air, Solvent (5 mL).

### 3.3 Screening of the additives

**Table S3.** Screening of the additives<sup>a,b</sup>

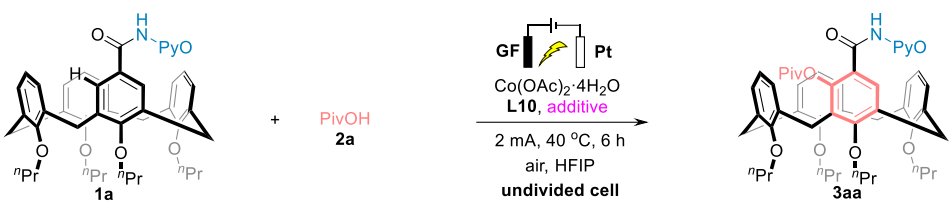

| Entry           | Additives                       | Yield (%) | ee (%) |
|-----------------|---------------------------------|-----------|--------|
| 1               | -                               | 41        | 98     |
| 2               | AcOH                            | trace     | -      |
| 3               | Na <sub>2</sub> CO <sub>3</sub> | 69        | 94     |
| 4               | NaHCO <sub>3</sub>              | 51        | 92     |
| 5               | DBU                             | 85        | 96     |
| 6               | Pyridine                        | 11        | 89     |
| 7               | DMAP                            | 27        | 89     |
| 8               | Et <sub>3</sub> N               | 71        | 98     |
| 9               | <sup>t</sup> BuONa              | 85        | >99    |
| 10              | NaOH                            | 89        | >99    |
| 11 <sup>c</sup> | NaOH                            | 86        | >99    |

<sup>a</sup>Undivided cell, GF anode (15 mm × 10 mm × 6 mm submerged), platinum plated cathode (10 mm × 10 mm × 0.1 mm submerged), constant current of 2 mA; isolated yields are indicated; ee values were determined by chiral HPLC analysis.

<sup>b</sup>**1a** (0.1 mmol), **2a** (0.2 mmol), Co(OAc)<sub>2</sub>·4H<sub>2</sub>O (10 mol%), **L10** (20 mol%), additive (2 equiv), 40 °C, 6 h, air, HFIP (5 mL).

<sup>c</sup>Tetrabutylammonium hexafluorophosphate (2 equiv).



### 3.4 Screening of the cobalt salts

**Table S4.** Screening of the cobalt salts<sup>a,b</sup>

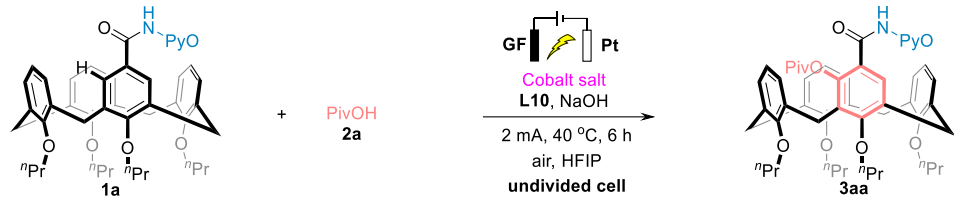

| Entry | Cobalt salts                                          | Yield (%) | ee (%) |
|-------|-------------------------------------------------------|-----------|--------|
| 1     | Co(OAc) <sub>2</sub> ·4H <sub>2</sub> O               | 89        | >99    |
| 2     | Co(OAc) <sub>2</sub>                                  | 85        | >99    |
| 3     | Co(OOCC <sub>6</sub> H <sub>5</sub> ) <sub>2</sub>    | 55        | 96     |
| 4     | Co(acac) <sub>2</sub>                                 | Trace     | -      |
| 5     | Co(ONO <sub>3</sub> ) <sub>2</sub> ·6H <sub>2</sub> O | Trace     | -      |
| 6     | CoF <sub>2</sub>                                      | 14        | 93     |
| 7     | CoBr <sub>2</sub>                                     | 23        | 92     |
| 8     | CoSO <sub>4</sub> ·H <sub>2</sub> O                   | Trace     | -      |
| 9     | Co(BF <sub>4</sub> ) <sub>2</sub> ·6H <sub>2</sub> O  | trace     | -      |

<sup>a</sup>Undivided cell, GF anode (15 mm × 10 mm × 6 mm submerged), platinum plated cathode (10 mm × 10 mm × 0.1 mm submerged), constant current of 2 mA; isolated yields are indicated; ee values were determined by chiral HPLC analysis.

<sup>b</sup>**1a** (0.1 mmol), **2a** (0.2 mmol), Cobalt salt (10 mol%), **L10** (20 mol%), NaOH (2 equiv), 40 °C, 6 h, air, HFIP (5 mL).

### 3.5 Screening of the current

**Table S5.** Screening of the current<sup>a,b</sup>

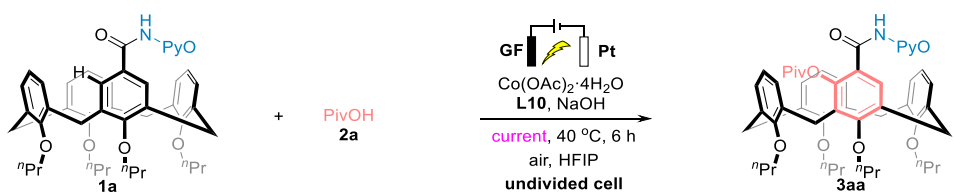

| Entry          | Current (mA) | Yield (%) | ee (%) |
|----------------|--------------|-----------|--------|
| 1              | 1            | 39        | 99     |
| 2 <sup>c</sup> | 1            | 43        | 99     |
| 3              | 2            | 89        | >99    |
| 4 <sup>d</sup> | 3            | 69        | 98     |
| 5 <sup>d</sup> | 4            | 59        | 98     |

<sup>a</sup>Undivided cell, GF anode (15 mm × 10 mm × 6 mm submerged), platinum plated cathode (10 mm × 10 mm × 0.1 mm submerged), constant current of 2 mA; isolated yields are indicated; ee values were determined by chiral HPLC analysis.

<sup>b</sup>**1a** (0.1 mmol), **2a** (0.2 mmol), Cobalt salt (10 mol%), **L10** (20 mol%), NaOH (2 equiv), 40 °C, 6 h, air, HFIP (5 mL).

<sup>c</sup>8 h. <sup>d</sup>5 h.

### 3.6 Screening of the reaction time and temperature

**Table S6.** Screening of the reaction time and temperature<sup>a,b</sup>

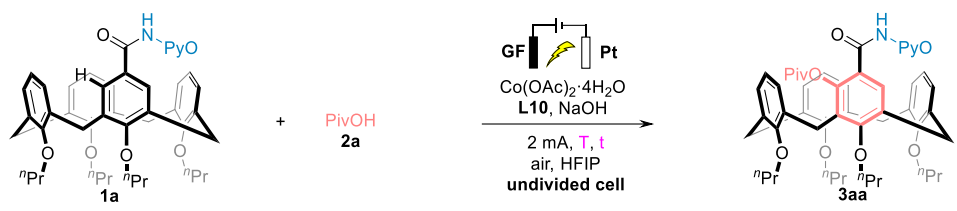

| Entry | T (°C) | t (h) | Yield (%) | ee (%) |
|-------|--------|-------|-----------|--------|
| 1     | 80     | 6     | 86        | 98     |
| 2     | 60     | 6     | 88        | 99     |
| 3     | 40     | 6     | 89        | >99    |
| 4     | 25     | 6     | 48        | 98     |
| 5     | 40     | 2     | 44        | 98     |
| 6     | 40     | 4     | 67        | 99     |
| 7     | 40     | 6     | 89        | >99    |
| 8     | 40     | 8     | 79        | >99    |
| 9     | 40     | 10    | 65        | 99     |

<sup>a</sup>Undivided cell, GF anode (15 mm × 10 mm × 6 mm submerged), platinum plated cathode (10 mm × 10 mm × 0.1 mm submerged), constant current of 2 mA; isolated yields are indicated; ee values were determined by chiral HPLC analysis.

<sup>b</sup>**1a** (0.1 mmol), **2a** (0.2 mmol), Cobalt salt (10 mol%), **L10** (20 mol%), NaOH (2 equiv), air, HFIP (5 mL).

### 3.7 Screening of the dosages of catalysts and ligands

**Table S7.** Screening of the dosages of catalysts and ligands<sup>a,b</sup>

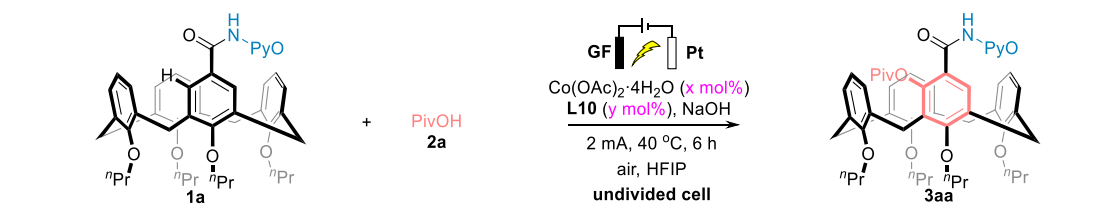

| Entry | x  | y  | Yield (%) | ee (%) |
|-------|----|----|-----------|--------|
| 1     | 10 | 20 | 89        | >99    |
| 2     | 10 | 15 | 64        | 94     |
| 3     | 10 | 10 | 53        | 93     |
| 4     | 5  | 10 | 23        | 92     |

<sup>a</sup>Undivided cell, GF anode (15 mm × 10 mm × 6 mm submerged), platinum plated cathode (10 mm × 10 mm × 0.1 mm submerged), constant current of 2 mA; isolated yields are indicated; ee values were determined by chiral HPLC analysis.

<sup>b</sup>**1a** (0.1 mmol), **2a** (0.2 mmol), Cobalt salt (x mol%), **L10** (y mol%), NaOH (2 equiv), 2 mA, 40 °C, 6 h, air, HFIP (5 mL).

### 3.8 Screening of the electrode materials

**Table S8.** Screening of the electrode materials<sup>a,b</sup>

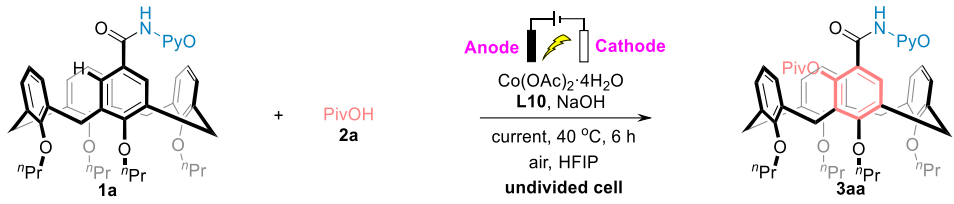

| Entry | Anode | Cathode         | Yield (%) | ee (%) |
|-------|-------|-----------------|-----------|--------|
| 1     | GF    | Pt              | 89        | >99    |
| 2     | Pt    | Pt              | 23        | 94     |
| 3     | GF    | GF              | 36        | 93     |
| 4     | GF    | Pt              | 44        | 98     |
| 5     | GF    | Stainless steel | 54        | 95     |

<sup>a</sup>Undivided cell, anode (15 mm × 10 mm × 6 mm submerged), cathode (10 mm × 10 mm × 0.1 mm submerged), constant current of 2 mA; isolated yields are indicated; ee values were determined by chiral HPLC analysis.

<sup>b</sup>**1a** (0.1 mmol), **2a** (0.2 mmol), Cobalt salt (10 mol%), **L10** (20 mol%), NaOH (2 equiv), 2 mA, 40 °C, 6 h, air, HFIP (5 mL).

#### Screening of the oxidants

**Table S8-1.** Screening of the oxidants<sup>a</sup>

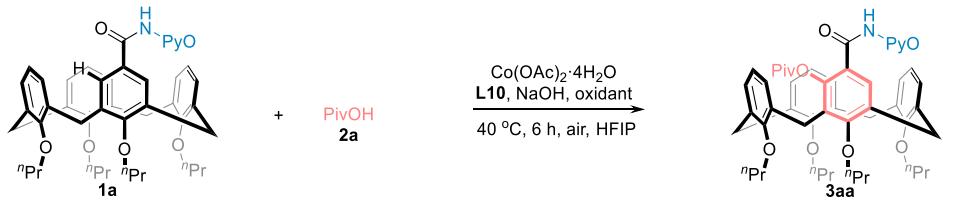

| Entry          | Oxidant                                 | Yield (%)    | ee (%) |
|----------------|-----------------------------------------|--------------|--------|
| 1              | Ag <sub>2</sub> CO <sub>3</sub>         | 18           | >99    |
| 2              | Mn(OAc) <sub>3</sub> ·2H <sub>2</sub> O | trace        | -      |
| 3              | O <sub>2</sub>                          | <sup>b</sup> | -      |
| 4 <sup>c</sup> | O <sub>2</sub>                          | <sup>b</sup> | -      |
| 5 <sup>d</sup> | O <sub>2</sub>                          | <sup>b</sup> | -      |

<sup>a</sup>**1a** (0.1 mmol), **2a** (0.2 mmol), Co(OAc)<sub>2</sub>·4H<sub>2</sub>O (10 mol%), **L10** (20 mol%), NaOH (2 equiv), oxidant (1.0 equiv.), 40 °C, 6 h, air, HFIP (5 mL). <sup>b</sup>No desired compound was observed. <sup>c</sup>60 °C.

<sup>d</sup>100 °C

## 4. Mechanistic studies

### 4.1 Non-linear effect studies

The synthesis of compound **3aa** was set as the template reaction to conduct the non-linear effect studies. The ligand **L10** samples with various ee values were prepared by rational mixture of enantiopure and racemic **L10** as shown in Table xx. Then the obtained ligands were subjected to the synthesis of compound **3aa** under standard conditions, leading to the corresponding products which were purified by flash column chromatography (PE:EA = 2:1). The ee values were determined by chiral HPLC analysis. The results indicated the linearity between the ee values of **L10** and product **3aa**.

Table S9. Non-linear effect studies

|                   |   |    |    |    |    |    |
|-------------------|---|----|----|----|----|----|
| <b>L10</b> ee (%) | 0 | 20 | 40 | 60 | 80 | 99 |
| <b>3aa</b> ee (%) | 0 | 24 | 40 | 56 | 81 | 99 |

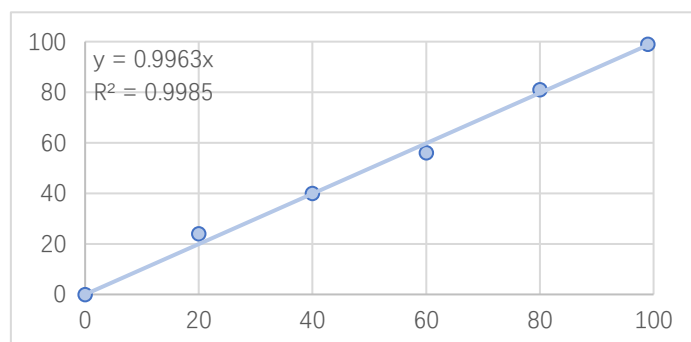

### 4.2 Dynamic electrode potential analysis

The synthesis of compound **3aa** was set as the template reaction to conduct the dynamic electrode potential analysis. The silver wire (100 mm×1 mm) was used as the reference electrode. A steady potential was observed.

### 4.3 Cyclic voltammetry studies

The cyclic voltammetry analysis was conducted on an electrochemical workstation (CHI 760E). The electrolysis experiments were implemented with a glassy carbon electrode, Pt electrode and Ag/AgCl reference electrode. The electrolysis was irreversible since the value of  $i_{pa}/i_{pc}$  was far less than 1.

## 5. Application studies

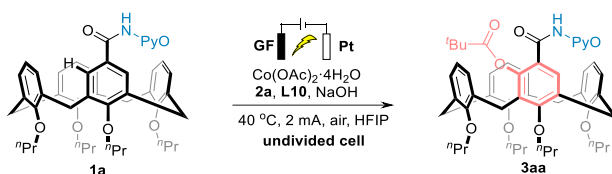

### Scale-up synthesis of **3aa**: 0.3 mmol

To a flash (30 mL) was added **1a** (0.3 mmol),  $\text{Co(OAc)}_2 \cdot 4\text{H}_2\text{O}$  (10 mol%), **L10** (20 mol%), NaOH (2 equiv), pivalic acid (2 equiv) and hexafluoroisopropanol (20 mL). It was then equipped with a graphite anode (20 mm×20 mm×6 mm) and a platinum cathode (10 mm×10 mm×0.1 mm) in an undivided cell. The reaction was conducted at a constant current model (2 mA) and stirred at 40 °C for 10 h. After the total consumption of **1a** monitored by TLC, the reaction was diluted with  $\text{CH}_2\text{Cl}_2$  and washed with  $\text{NaHCO}_3$  aqueous solution. The organic phase was concentrated under reduced pressure to give a residue, which was purified by flash column chromatography (petroleum ether/ethyl acetate = 2/1) to furnish the desired product as a light grey solid (0.18 g, 72%, 99% ee).

### Scale-up synthesis of **3aa**: 1.0 mmol

To a flash (100 mL) was added **1a** (1.0 mmol),  $\text{Co(OAc)}_2 \cdot 4\text{H}_2\text{O}$  (10 mol%), **L10** (20 mol%), NaOH (2 equiv), pivalic acid (2 equiv) and hexafluoroisopropanol (80 mL). It was then equipped with a graphite anode (45 mm×20 mm×6 mm) and a platinum cathode (45 mm×20 mm×0.1 mm) in an undivided cell. The reaction was conducted at a constant current model (2 mA) and stirred at 40 °C for 72 h. After the total consumption of **1a** monitored by TLC, the reaction was diluted with  $\text{CH}_2\text{Cl}_2$  and washed with  $\text{NaHCO}_3$  aqueous solution. The organic phase was concentrated under reduced pressure to give a residue, which was purified by flash column chromatography (petroleum ether/ethyl acetate = 2/1) to furnish the desired product as a light grey solid (0.662 g, 80%, 99% ee).

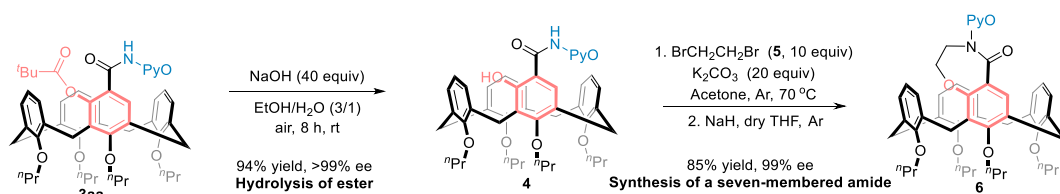

### Hydrolysis of the ester motif:

To a flask was added **3aa** (0.1 mmol), NaOH (40 equiv) and EtOH/ $\text{H}_2\text{O}$  (3 mL/1 mL). The mixture was stirred at 25 °C for 8 h under Ar atmosphere. After the total consumption of **3aa** monitored by TLC, the reaction was diluted with  $\text{CH}_2\text{Cl}_2$  and washed with 1 N HCl aqueous solution. The organic phase was concentrated under reduced pressure to give a residue, which

was purified by flash column chromatography (petroleum ether/ethyl acetate = 1/1) to furnish the desired product **4** as a white solid (70.0 mg, 94%, >99% ee).

*Synthesis of an inherently chiral calix[4]arenes embedded with a seven-membered amide:*

To a dry flask was added the previously obtained compound **4** (0.1 mmol), **5** (1 mmol, 10 equiv), K<sub>2</sub>CO<sub>3</sub> (2 mmol, 20 equiv) and acetone (5 mL). The mixture was stirred in an oil bath (70 °C) for 12 h. After the total consumption of **4** monitored by TLC, the solvent was removed with a rotovap under reduced pressure to give a residue, which was dissolved in dry THF (5 mL) in a dry flask under Ar atmosphere. After the addition of NaH (0.23 mmol) at 0 °C, the reaction was stirred at room temperature for 6 h, followed by quenching with NH<sub>4</sub>Cl aqueous solution. The mixture was extracted with DCM. The organic phase was washed with brine and dried over Na<sub>2</sub>SO<sub>4</sub>. After concentration under reduced pressure, the resulting residue was purified by flash column chromatography (petroleum ether/ethyl acetate = 1/2) to furnish the desired product **6** as a white solid (66 mg, 85%, 99% ee).

## 6. X-ray diffraction analysis

*Preparation of crystal*

The single crystal of **3al** was obtained by slow evaporation at room temperature from a mixed solvent of isopropanol and hexane (1:2).

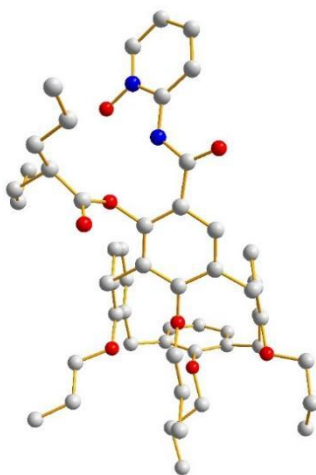

**Table S10.** Crystal data and structure refinement for **3al** (CCDC 2339942).

|                     |                                                               |
|---------------------|---------------------------------------------------------------|
| Identification code | 3al                                                           |
| Empirical formula   | C <sub>54</sub> H <sub>65</sub> N <sub>2</sub> O <sub>8</sub> |
| Formula weight      | 870.08                                                        |
| Temperature/K       | 200.00(10)                                                    |
| Crystal system      | orthorhombic                                                  |
| Space group         | P2 <sub>1</sub> 2 <sub>1</sub> 2 <sub>1</sub>                 |



---

|                                             |                                                                |
|---------------------------------------------|----------------------------------------------------------------|
| a/Å                                         | 9.7335(2)                                                      |
| b/Å                                         | 13.0898(4)                                                     |
| c/Å                                         | 38.4467(11)                                                    |
| $\alpha$ /°                                 | 90                                                             |
| $\beta$ /°                                  | 90                                                             |
| $\gamma$ /°                                 | 90                                                             |
| Volume/Å <sup>3</sup>                       | 4898.5(2)                                                      |
| Z                                           | 4                                                              |
| $\rho_{\text{calc}}/\text{cm}^3$            | 1.180                                                          |
| $\mu/\text{mm}^{-1}$                        | 0.627                                                          |
| F(000)                                      | 1868.0                                                         |
| Crystal size/mm <sup>3</sup>                | 0.2 × 0.12 × 0.11                                              |
| Radiation                                   | Cu K $\alpha$ ( $\lambda$ = 1.54184)                           |
| 2 $\Theta$ range for data collection/°      | 7.134 to 149.194                                               |
| Index ranges                                | -12 ≤ h ≤ 6, -16 ≤ k ≤ 15, -46 ≤ l ≤ 47                        |
| Reflections collected                       | 54476                                                          |
| Independent reflections                     | 9828 [ $R_{\text{int}}$ = 0.0611, $R_{\text{sigma}}$ = 0.0393] |
| Data/restraints/parameters                  | 9828/0/583                                                     |
| Goodness-of-fit on F <sup>2</sup>           | 1.051                                                          |
| Final R indexes [ $I \geq 2\sigma(I)$ ]     | $R_1$ = 0.0552, $wR_2$ = 0.1530                                |
| Final R indexes [all data]                  | $R_1$ = 0.0666, $wR_2$ = 0.1636                                |
| Largest diff. peak/hole / e Å <sup>-3</sup> | 0.58/-0.47                                                     |
| Flack parameter                             | -0.04(8)                                                       |

---

## 7. NMR data of the acyloxylated inherently chiral calix[4]arenes

### 2-(1<sup>4</sup>-(pivaloyloxy)-1<sup>2</sup>,3<sup>2</sup>,5<sup>2</sup>,7<sup>2</sup>-tetrapropoxy-1,3,5,7(1,3)-tetrabenzenacyclooctaphane-1<sup>5</sup>-carboxamido)pyridine 1-oxide (3aa)

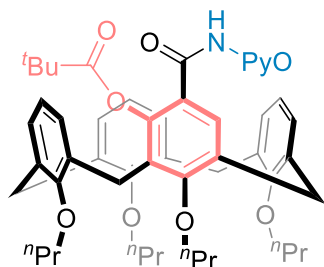

Yield: 73.7 mg (89%), Grey solid, mp: 115 °C.

<sup>1</sup>H NMR (600 MHz, CDCl<sub>3</sub>) δ 10.53 (s, 1H), 8.58 (dd, *J* = 8.5, 1.6 Hz, 1H), 8.28 (dd, *J* = 6.5, 1.0 Hz, 1H), 7.56 (s, 1H), 7.41-7.35 (m, 1H), 7.11 (dd, *J* = 7.4, 2.6 Hz, 2H), 7.05-6.98 (m, 1H), 6.92 (t, *J* = 7.4 Hz, 1H), 6.26 (ddd, *J* = 26.0, 16.8, 7.4 Hz, 3H), 6.15 (dd, *J* = 17.1, 7.8 Hz, 3H), 4.51-4.39 (m, 3H), 4.21-4.09 (m, 3H), 4.06-3.95 (m, 2H), 3.74-3.59 (m, 4H), 3.40 (d, *J* = 13.9 Hz, 1H), 3.24 (d, *J* = 13.7 Hz, 1H), 3.15 (dd, *J* = 13.4, 4.9 Hz, 2H), 1.98 (dt, *J* = 15.4, 7.5 Hz, 4H), 1.87 (ddd, *J* = 14.1, 7.1, 4.6 Hz, 4H), 1.36 (s, 9H), 1.09 (dd, *J* = 16.1, 7.5 Hz, 6H), 0.90 (dt, *J* = 10.5, 7.5 Hz, 6H). <sup>13</sup>C NMR (151 MHz, CDCl<sub>3</sub>) δ 176.9, 164.8, 162.3, 157.9, 157.2, 155.2, 155.1, 146.5, 144.7, 137.1, 137.0, 136.9, 134.9, 133.4, 133.3, 131.9, 131.81, 131.78, 128.97, 128.94, 128.3, 128.0, 127.9, 127.86, 127.82, 127.5, 127.3, 122.7, 122.4, 121.9, 121.7, 118.5, 77.1, 77.0, 76.5, 39.3, 31.0, 30.7, 27.2, 23.5, 23.49, 23.1, 23.0, 10.8, 10.77, 9.8, 9.76.

**HRMS** (ESI): *m/z* [M+H]<sup>+</sup> calcd for [C<sub>51</sub>H<sub>61</sub>N<sub>2</sub>O<sub>8</sub>]<sup>+</sup> requires 829.4428, found 829.4435. [α]<sub>D</sub><sup>25</sup> = +27 (c = 0.1, CH<sub>2</sub>Cl<sub>2</sub>). The product was analyzed by HPLC to determine the enantiomeric excess: >99% ee (CHIRALPAK AD-H, hexane/*i*-PrOH =95/5, detector: 254 nm, T = 25 °C, flow rate: 1 mL/min), *t*<sub>1</sub> (major) = 12.648 min, *t*<sub>2</sub> (minor) = 11.460 min.

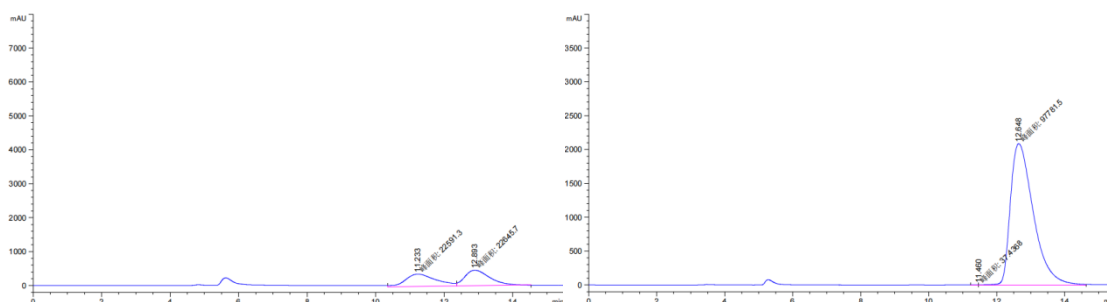

| Peak | RetTime | Area    | Height    | Area    |
|------|---------|---------|-----------|---------|
| 1    | 11.233  | 22591.3 | 363.82465 | 49.9398 |
| 2    | 12.893  | 22645.7 | 454.52222 | 50.0602 |

| Peak | RetTime | Area    | Height     | Area    |
|------|---------|---------|------------|---------|
| 1    | 11.460  | 37.4368 | 3.01561    | 0.0383  |
| 2    | 12.648  | 97781.5 | 2088.38672 | 99.9617 |

**2-(1<sup>4</sup>-((2,2-dimethylbutanoyl)oxy)-1<sup>2</sup>,3<sup>2</sup>,5<sup>2</sup>,7<sup>2</sup>-tetrapropoxy-1,3,5,7(1,3)-  
tetraabenzenacyclooctaphane-1<sup>5</sup>-carboxamido)pyridine 1-oxide (3ab)**

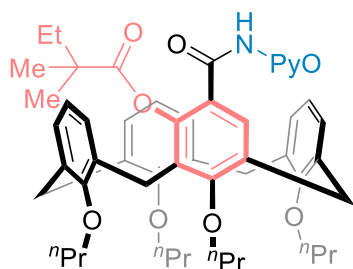

Yield: 71.6 mg (85%), Grey solid, mp: 118 °C.

<sup>1</sup>H NMR (600 MHz, CDCl<sub>3</sub>) δ 10.53 (s, 1H), 8.59 (dd, *J* = 8.5, 1.4 Hz, 1H), 8.30 (d, *J* = 6.1 Hz, 1H), 7.56 (s, 1H), 7.38 (t, *J* = 8.0 Hz, 1H), 7.13 (d, *J* = 7.5 Hz, 2H), 7.07-6.98 (m, 1H), 6.93 (t, *J* = 7.4 Hz, 1H), 6.25 (ddd, *J* = 33.9, 20.7, 7.4 Hz, 3H), 6.13 (dd, *J* = 13.7, 6.4 Hz, 3H), 4.51-4.39 (m, 3H), 4.22-4.05 (m, 3H), 4.01 (dd, *J* = 9.8, 6.7 Hz, 2H), 3.83-3.50 (m, 4H), 3.42 (d, *J* = 13.9 Hz, 1H), 3.24 (d, *J* = 13.7 Hz, 1H), 3.15 (dd, *J* = 13.4, 4.2 Hz, 2H), 2.05-1.90 (m, 4H), 1.87 (dt, *J* = 14.0, 7.0 Hz, 4H), 1.73 (dt, *J* = 13.9, 6.5 Hz, 2H), 1.33 (d, *J* = 3.5 Hz, 6H), 1.10 (dd, *J* = 16.2, 7.5 Hz, 6H), 0.94-0.85 (m, 9H). <sup>13</sup>C NMR (151 MHz, CDCl<sub>3</sub>) δ 176.5, 164.9, 162.3, 157.9, 155.2, 155.0, 146.4, 144.7, 137.1, 137.03, 137.01, 134.9, 133.3, 133.2, 131.88, 131.82, 131.80, 129.0, 128.9, 128.3, 128.0, 127.82, 127.78, 127.5, 127.3, 122.7, 122.4, 121.9, 118.5, 114.9, 77.1, 76.9, 76.5, 43.0, 33.0, 31.0, 30.7, 24.6, 24.4, 23.5, 23.1, 23.0, 22.7, 10.83, 10.81, 9.8, 9.7, 9.0. HRMS (ESI): *m/z* [M+H]<sup>+</sup> calcd for [C<sub>52</sub>H<sub>63</sub>N<sub>2</sub>O<sub>8</sub>]<sup>+</sup> requires 843.4584, found 843.4587. [α]<sub>D</sub><sup>25</sup> = +11 (c = 0.1, CH<sub>2</sub>Cl<sub>2</sub>). The product was analyzed by HPLC to determine the enantiomeric excess: 98% ee (CHIRALPAK AD-H, hexane/*i*-PrOH = 95/5, detector: 254 nm, T = 25 °C, flow rate: 1 mL/min), *t*<sub>1</sub> (major) = 12.565 min, *t*<sub>2</sub> (minor) = 10.595 min.

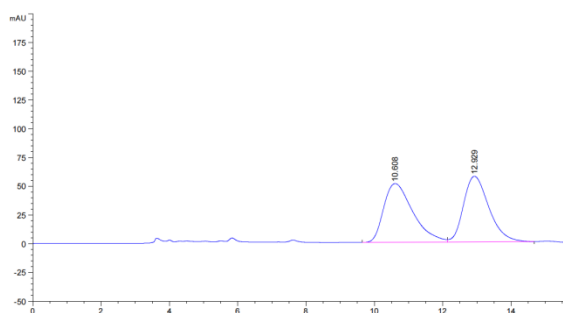

| Peak | RetTime | Area       | Height   | Area    |
|------|---------|------------|----------|---------|
| 1    | 10.608  | 3022.96216 | 50.99575 | 50.6313 |
| 2    | 12.929  | 2947.57495 | 57.03631 | 49.3687 |

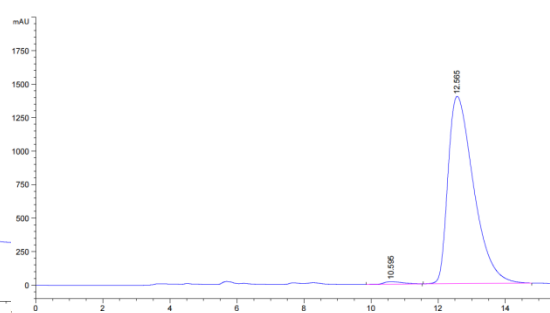

| Peak | RetTime | Area      | Height     | Area    |
|------|---------|-----------|------------|---------|
| 1    | 10.595  | 734.93353 | 19.47724   | 0.9855  |
| 2    | 12.565  | 73836.4   | 1396.22437 | 99.0145 |

**2-(1<sup>4</sup>-((1-methylcyclopropane-1-carbonyloxy)-1<sup>2</sup>,3<sup>2</sup>,5<sup>2</sup>,7<sup>2</sup>-tetrapropoxy-1,3,5,7(1,3)-  
tetrabenzenacyclooctaphane-1<sup>5</sup>-carboxamido)pyridine 1-oxide (3ac)**

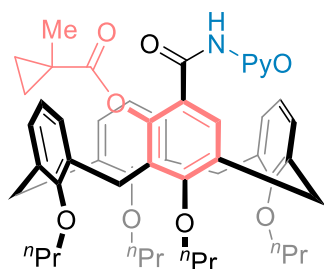

Yield: 66.9 mg (81%), White solid, mp: 117 °C. <sup>1</sup>H NMR (600 MHz, CDCl<sub>3</sub>) δ 10.53 (s, 1H), 8.59 (dd, *J* = 8.5, 1.6 Hz, 1H), 8.34-8.29 (m, 1H), 7.50 (s, 1H), 7.42-7.29 (m, 1H), 7.00 (ddd, *J* = 18.5, 12.5, 4.6 Hz, 3H), 6.83 (t, *J* = 7.4 Hz, 1H), 6.42 – 6.19 (m, 6H), 4.51-4.40 (m, 3H), 4.19 (d, *J* = 13.9 Hz, 1H), 4.15-4.04 (m, 2H), 3.97 (dd, *J* = 9.2, 6.8 Hz, 2H), 3.79-3.53 (m, 4H), 3.38 (d, *J* = 13.9 Hz, 1H), 3.24 (d, *J* = 13.7 Hz, 1H), 3.16 (dd, *J* = 13.4, 4.2 Hz, 2H), 2.12-1.72 (m, 8H), 1.47 (s, 3H), 1.07 (q, *J* = 7.3 Hz, 6H), 1.03-0.88 (m, 8H), 0.79 (d, *J* = 2.8 Hz, 2H). <sup>13</sup>C NMR (151 MHz, CDCl<sub>3</sub>) δ 174.5, 165.6, 164.6, 162.1, 157.5, 156.8, 155.5, 155.4, 146.5, 144.7, 137.1, 136.5, 136.4, 135.9, 135.7, 134.8, 134.6, 134.5, 133.9, 133.8, 132.4, 132.1, 131.2, 128.87, 128.81, 128.7, 128.3, 128.1, 128.0, 127.6, 127.58, 122.5, 122.4, 122.3, 122.0, 121.9, 121.4, 118.5, 115.0, 114.6, 76.9, 76.7, 76.5, 31.0, 30.98, 30.7, 24.3, 23.5, 23.4, 23.2, 23.1, 23.0, 19.4, 19.0, 17.7, 17.6, 10.7, 10.6, 10.0, 9.9. HRMS (ESI): *m/z* [M+H]<sup>+</sup> calcd for [C<sub>51</sub>H<sub>59</sub>N<sub>2</sub>O<sub>8</sub>]<sup>+</sup> requires 827.4271, found 827.4280. [α]<sub>D</sub><sup>25</sup> = +36 (c = 0.1, CH<sub>2</sub>Cl<sub>2</sub>). The product was analyzed by HPLC to determine the enantiomeric excess: 95% ee (CHIRALPAK AD-H, hexane/*i*-PrOH = 95/5, detector: 254 nm, T = 25 °C, flow rate: 1 mL/min), *t*<sub>1</sub> (major) = 13.637 min, *t*<sub>2</sub> (minor) = 11.703 min.

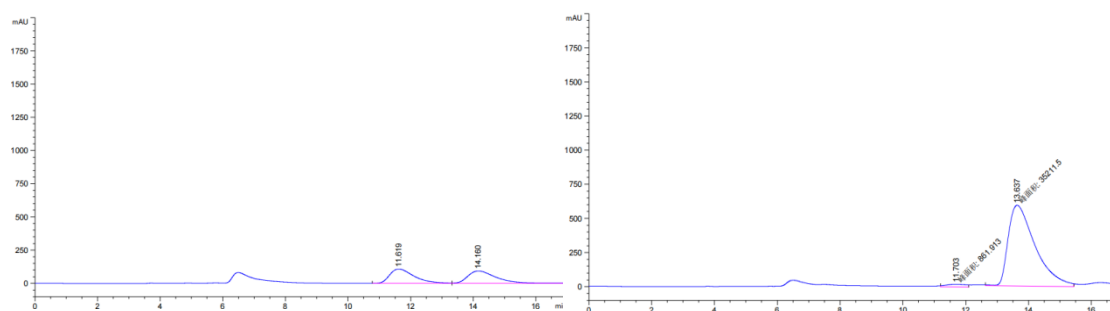

| Peak | RetTime | Area       | Height    | Area    |
|------|---------|------------|-----------|---------|
| 1    | 11.619  | 5802.98096 | 107.56480 | 49.9495 |
| 2    | 14.160  | 5814.71924 | 92.69424  | 50.0505 |

| Peak | RetTime | Area      | Height    | Area    |
|------|---------|-----------|-----------|---------|
| 1    | 11.703  | 861.91315 | 19.45750  | 2.3893  |
| 2    | 13.637  | 35211.5   | 590.70612 | 97.6107 |

**2-(1<sup>4</sup>-((1-methylcyclohexane-1-carbonyl)oxy)-1<sup>2</sup>,3<sup>2</sup>,5<sup>2</sup>,7<sup>2</sup>-tetrapropoxy-1,3,5,7(1,3)-  
tetrabenzenacyclooctaphane-1<sup>5</sup>-carboxamido)pyridine 1-oxide (3ad)**

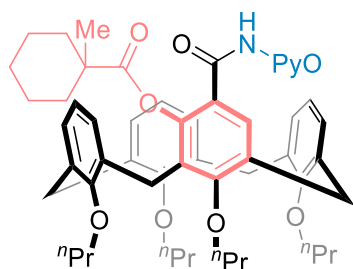

Yield: 62.5 mg (82%), White solid, mp: 128 °C.

<sup>1</sup>H NMR (600 MHz, CDCl<sub>3</sub>) δ 10.51 (s, 1H), 8.58 (dd, *J* = 8.5, 1.5 Hz, 1H), 8.32 – 8.27 (m, 1H), 7.54 (s, 1H), 7.42-7.35 (m, 1H), 7.13 (d, *J* = 7.5 Hz, 2H), 7.05-6.98 (m, 1H), 6.94 (t, *J* = 7.4 Hz, 1H), 6.30-6.23 (m, 2H), 6.19 (d, *J* = 7.4, 1H), 6.15-6.09 (m, 3H), 4.51-4.40 (m, 3H), 4.22-4.07 (m, 3H), 4.02 (dd, *J* = 10.0, 6.6 Hz, 2H), 3.74-3.59 (m, 4H), 3.45 (d, *J* = 13.9 Hz, 1H), 3.24 (d, *J* = 13.7 Hz, 1H), 3.15 (dd, *J* = 13.4, 5.1 Hz, 2H), 2.22-2.04 (m, 2H), 1.98 (dt, *J* = 9.7, 7.9 Hz, 4H), 1.87 (dt, *J* = 14.5, 7.2 Hz, 4H), 1.56-1.31 (m, 8H), 1.34 (s, 3H), 1.10 (dt, *J* = 10.0, 7.4 Hz, 6H), 0.90 (dt, *J* = 12.4, 7.5 Hz, 6H). <sup>13</sup>C NMR (151 MHz, CDCl<sub>3</sub>) δ 176.4, 165.0, 162.2, 157.9, 155.1, 155.0, 146.2, 144.7, 137.1, 137.06, 137.03, 134.9, 133.3, 133.2, 131.9, 131.86, 131.81, 129.0, 128.99, 128.2, 128.0, 127.8, 127.77, 127.4, 127.2, 122.7, 122.4, 122.2, 121.9, 118.5, 114.8, 77.1, 77.0, 76.5, 43.3, 35.3, 35.1, 31.0, 30.7, 25.7, 23.5, 23.49, 23.1, 23.0, 22.6, 22.5, 10.84, 10.82, 9.8, 9.7. HRMS (ESI): *m/z* [M+H]<sup>+</sup> calcd for [C<sub>54</sub>H<sub>65</sub>N<sub>2</sub>O<sub>8</sub>]<sup>+</sup> requires 869.4741, found 869.4744. [α]<sub>D</sub><sup>25</sup> = +39 (c = 0.1, CH<sub>2</sub>Cl<sub>2</sub>). The product was analyzed by HPLC to determine the enantiomeric excess: >99% ee (CHIRALPAK AD-H, hexane/*i*-PrOH = 95/5, detector: 254 nm, T = 25 °C, flow rate: 1 mL/min), t<sub>1</sub> (major) = 14.755 min, t<sub>2</sub> (minor) = 9.806 min.

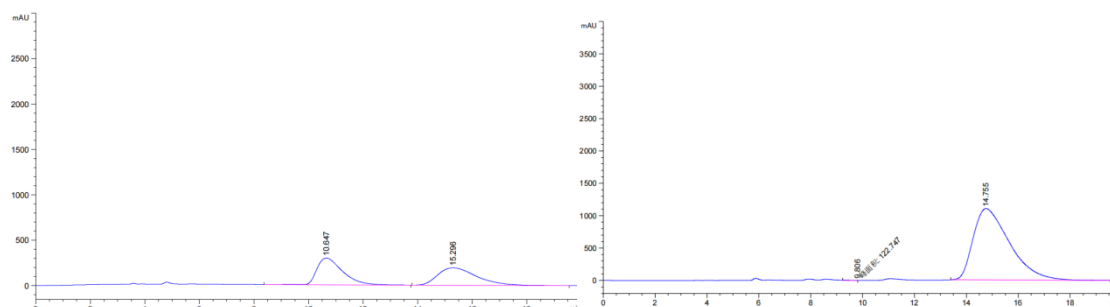

| Peak | RetTime | Area    | Height    | Area    |
|------|---------|---------|-----------|---------|
| 1    | 10.647  | 19289.3 | 294.47650 | 50.5300 |
| 2    | 15.296  | 18884.6 | 190.42738 | 49.4700 |

| Peak | RetTime | Area      | Height     | Area    |
|------|---------|-----------|------------|---------|
| 1    | 9.806   | 122.74713 | 4.35635    | 0.1144  |
| 2    | 14.755  | 10718.8   | 1103.01733 | 99.8856 |

**2-(1<sup>4</sup>-((adamantane-1-carbonyl)oxy)-1<sup>2</sup>,3<sup>2</sup>,5<sup>2</sup>,7<sup>2</sup>-tetrapropoxy-1,3,5,7(1,3)-  
tetrabenzenacyclooctaphane-1<sup>5</sup>-carboxamido)pyridine 1-oxide (3ae)**

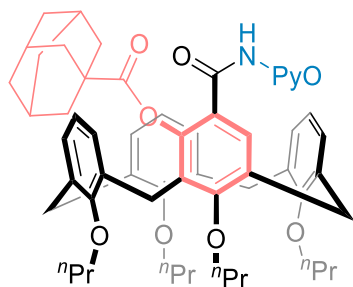

Yield: 65.3 mg (72%), White solid, mp: 130 °C. <sup>1</sup>H NMR (600 MHz, CDCl<sub>3</sub>) δ 10.51 (s, 1H), 8.58 (d, *J* = 8.3 Hz, 1H), 8.29 (d, *J* = 6.4 Hz, 1H), 7.55 (s, 1H), 7.39 (t, *J* = 8.0 Hz, 1H), 7.12 (d, *J* = 7.4 Hz, 2H), 7.02 (t, *J* = 7.0 Hz, 1H), 6.93 (t, *J* = 7.4 Hz, 1H), 6.35-6.21 (m, 3H), 6.21-6.09 (m, 3H), 4.46 (dd, *J* = 20.8, 13.5 Hz, 3H), 4.21-4.06 (m, 3H), 4.01 (td, *J* = 7.1, 2.7 Hz, 2H), 3.73-3.51 (m, 4H), 3.40 (d, *J* = 13.8 Hz, 1H), 3.24 (d, *J* = 13.7 Hz, 1H), 3.15 (dd, *J* = 13.4, 4.6 Hz, 2H), 2.07 (s, 6H), 2.04-1.92 (m, 7H), 1.88 (dd, *J* = 14.2, 7.1 Hz, 4H), 1.71 (s, 6H), 1.10 (td, *J* = 7.4, 3.5 Hz, 6H), 0.90 (dd, *J* = 17.0, 7.6 Hz, 6H). <sup>13</sup>C NMR (151 MHz, CDCl<sub>3</sub>) δ 176.0, 164.7, 162.3, 157.9, 155.2, 155.1, 146.5, 144.7, 137.05, 137.01, 136.9, 134.8, 133.4, 133.3, 131.9, 131.8, 129.0, 128.9, 128.3, 128.0, 127.86, 127.80, 127.5, 127.3, 122.7, 122.4, 121.9, 121.8, 118.5, 114.9, 77.1, 77.0, 76.5, 41.2, 38.6, 36.4, 31.0, 30.7, 27.9, 23.5, 23.4, 23.1, 23.0, 10.82, 10.80, 9.83, 9.77. HRMS (ESI): *m/z* [M+H]<sup>+</sup> calcd for [C<sub>57</sub>H<sub>67</sub>N<sub>2</sub>O<sub>8</sub>]<sup>+</sup> requires 907.4897, found 907.4896. [α]<sub>D</sub><sup>25</sup> = +11 (c = 0.1, CH<sub>2</sub>Cl<sub>2</sub>). The product was analyzed by HPLC to determine the enantiomeric excess: 99% ee (CHIRALPAK AD-H, hexane/*i*-PrOH = 95/5, detector: 254 nm, T = 25 °C, flow rate: 1 mL/min), *t*<sub>1</sub> (major) = 25.081 min, *t*<sub>2</sub> (minor) = 10.392 min.

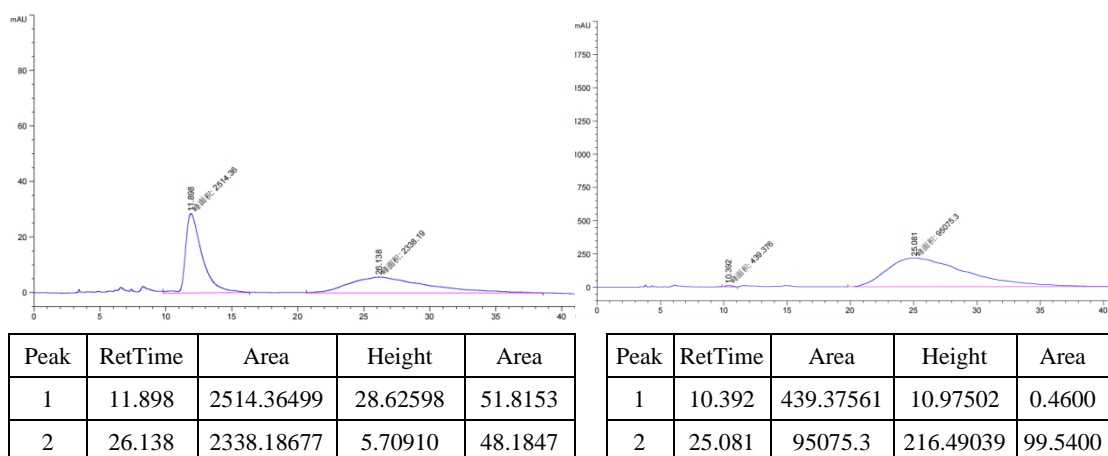

**2-(1<sup>4</sup>-((2-methyl-2-phenylpropanoyl)oxy)-1<sup>2</sup>,3<sup>2</sup>,5<sup>2</sup>,7<sup>2</sup>-tetrapropoxy-1,3,5,7(1,3)-  
tetrabenzenacyclooctaphane-1<sup>5</sup>-carboxamido)pyridine 1-oxide (3af)**

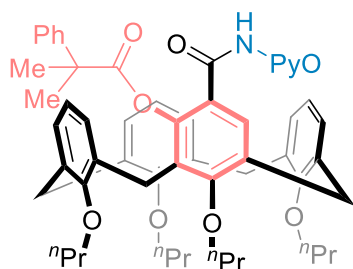

Yield: 62.3 mg (70%), White solid, mp: 128 °C.

<sup>1</sup>H NMR (600 MHz, CDCl<sub>3</sub>) δ 10.41 (s, 1H), 8.48 (dd, *J* = 8.4, 1.4 Hz, 1H), 8.26 (d, *J* = 6.3 Hz, 1H), 7.50 (s, 1H), 7.49-7.44 (m, 2H), 7.37 (t, *J* = 8.0 Hz, 1H), 7.17-7.05 (m, 4H), 7.05-6.98 (m, 2H), 6.90 (t, *J* = 7.4 Hz, 1H), 6.25 (dt, *J* = 11.7, 7.6 Hz, 2H), 6.13 (dd, *J* = 16.1, 6.7 Hz, 3H), 6.01 (d, *J* = 7.4 Hz, 1H), 4.47-4.37 (m, 3H), 4.07 (qd, *J* = 11.0, 2.8 Hz, 2H), 4.01-3.93 (m, 2H), 3.85 (d, *J* = 13.9 Hz, 1H), 3.72-3.54 (m, 3H), 3.54-3.44 (m, 1H), 3.21 (d, *J* = 13.7 Hz, 1H), 3.14 (dd, *J* = 13.4, 6.7 Hz, 2H), 2.83 (d, *J* = 14.0 Hz, 1H), 1.93 (dt, *J* = 15.5, 7.6 Hz, 4H), 1.88-1.79 (m, 4H), 1.78 (s, 3H), 1.75 (s, 3H), 1.07 (dt, *J* = 14.7, 7.4 Hz, 6H), 0.88 (td, *J* = 7.4, 2.9 Hz, 6H). <sup>13</sup>C NMR (151 MHz, CDCl<sub>3</sub>) δ 174.8, 164.7, 162.3, 157.9, 155.1, 146.2, 144.5, 143.3, 137.1, 137.0, 136.9, 135.0, 133.4, 133.0, 131.9, 131.85, 131.82, 128.93, 128.92, 128.3, 128.1, 127.9, 127.8, 127.6, 127.5, 127.3, 126.7, 126.1, 122.5, 122.4, 121.9, 121.6, 118.5, 115.0, 76.9, 76.5, 46.6, 31.0, 30.9, 30.7, 26.3, 25.8, 23.5, 23.4, 23.2, 23.05, 23.0, 10.8, 10.7, 9.8, 9.7.

**HRMS** (ESI): *m/z* [M+H]<sup>+</sup> calcd for [C<sub>56</sub>H<sub>63</sub>N<sub>2</sub>O<sub>8</sub>]<sup>+</sup> requires 891.4584, found 891.4589. [α]<sub>D</sub><sup>25</sup> = +28 (c = 0.1, CH<sub>2</sub>Cl<sub>2</sub>). The product was analyzed by HPLC to determine the enantiomeric excess: 98% ee (CHIRALPAK AD-H, hexane/*i*-PrOH = 95/5, detector: 254 nm, T = 25 °C, flow rate: 1 mL/min), *t*<sub>1</sub> (major) = 25.521 min, *t*<sub>2</sub> (minor) = 22.523 min.

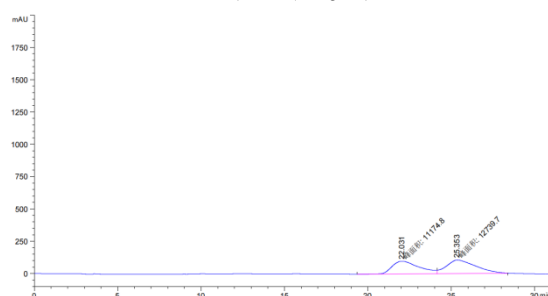

| Peak | RetTime | Area    | Height    | Area    |
|------|---------|---------|-----------|---------|
| 1    | 22.031  | 11174.8 | 98.36907  | 46.7282 |
| 2    | 25.353  | 12739.7 | 104.82605 | 53.2718 |

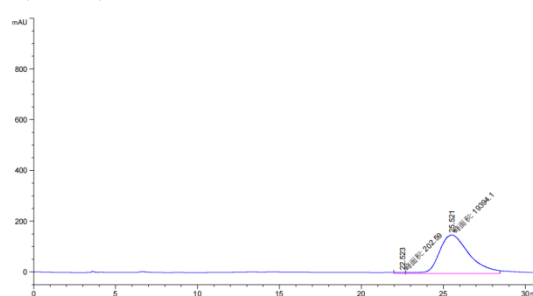

| Peak | RetTime | Area      | Height    | Area    |
|------|---------|-----------|-----------|---------|
| 1    | 22.523  | 202.59038 | 4.91290   | 1.0338  |
| 2    | 25.521  | 19394.1   | 151.93422 | 98.9662 |

2-(1<sup>4</sup>-((2,2-diphenylpropanoyl)oxy)-1<sup>2</sup>,3<sup>2</sup>,5<sup>2</sup>,7<sup>2</sup>-tetrapropoxy-1,3,5,7(1,3)-  
tetrabenzenacyclooctaphane-1<sup>5</sup>-carboxamido)pyridine 1-oxide (3ag)

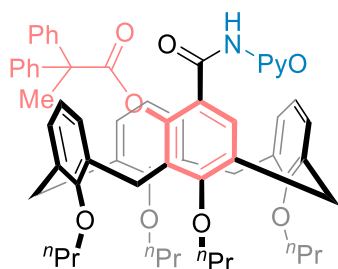

Yield: 75.2 mg (79%), White solid, mp: 134 °C. <sup>1</sup>H NMR (600 MHz, CDCl<sub>3</sub>) δ 10.47 (s, 1H), 8.56 (dd, *J* = 8.5, 1.4 Hz, 1H), 8.29 (d, *J* = 6.3 Hz, 1H), 7.52 (s, 1H), 7.41 (t, *J* = 8.0 Hz, 1H), 7.35 (dd, *J* = 7.2, 5.0 Hz, 4H), 7.21 (t, *J* = 7.5 Hz, 2H), 7.18-7.10 (m, 3H), 7.10-7.05 (m, 3H), 7.05-6.99 (m, 1H), 6.90 (t, *J* = 7.4 Hz, 1H), 6.27 (t, *J* = 7.5 Hz, 1H), 6.22 (t, *J* = 7.6 Hz, 1H), 6.17-6.09 (m, 3H), 6.01 (d, *J* = 7.4 Hz, 1H), 4.50-4.35 (m, 3H), 4.07 (td, *J* = 11.4, 3.3 Hz, 2H), 4.02-3.92 (m, 2H), 3.83 (d, *J* = 14.0 Hz, 1H), 3.72-3.57 (m, 3H), 3.47 (dt, *J* = 9.4, 6.9 Hz, 1H), 3.23 (d, *J* = 13.8 Hz, 1H), 3.15 (dd, *J* = 13.4, 5.9 Hz, 2H), 2.80 (d, *J* = 14.1 Hz, 1H), 2.18 (s, 3H), 1.98-1.76 (m, 8H), 1.08 (dt, *J* = 14.9, 7.4 Hz, 6H), 0.89 (t, *J* = 7.4 Hz, 6H). <sup>13</sup>C NMR (151 MHz, CDCl<sub>3</sub>) δ 173.4, 164.7, 162.4, 157.9, 155.2, 155.1, 146.3, 144.72, 144.68, 155.5, 143.7, 143.6, 137.2, 137.0, 136.8, 135.1, 133.5, 133.0, 132.0, 131.9, 131.8, 128.93, 128.91, 128.29, 128.25, 128.18, 128.01, 128.00, 127.9, 127.8, 127.6, 127.5, 127.4, 126.9, 126.8, 126.7, 122.4, 121.9, 121.4, 118.5, 115.0, 76.7, 76.5, 56.9, 31.0, 30.9, 30.7, 26.7, 23.5, 23.35, 23.30, 23.05, 23.01, 10.8, 10.76, 9.9, 9.8. HRMS (ESI): *m/z* [M+H]<sup>+</sup> calcd for [C<sub>61</sub>H<sub>65</sub>N<sub>2</sub>O<sub>8</sub>]<sup>+</sup> requires 953.4741, found 953.4749. [α]<sub>D</sub><sup>25</sup> = +30 (c = 0.1, CH<sub>2</sub>Cl<sub>2</sub>). The product was analyzed by HPLC to determine the enantiomeric excess: 99% ee (CHIRALPAK AD-H, hexane/*i*-PrOH = 95/5, detector: 254 nm, T = 25 °C, flow rate: 1 mL/min), *t*<sub>1</sub> (major) = 16.776 min, *t*<sub>2</sub> (minor) = 11.785 min.

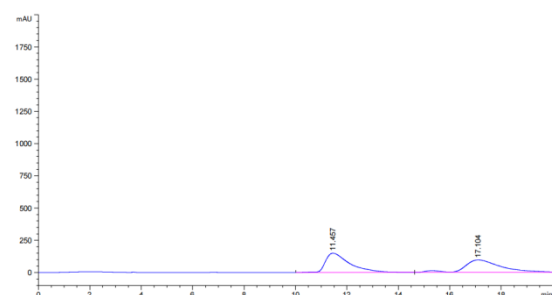

| Peak | RetTime | Area       | Height    | Area    |
|------|---------|------------|-----------|---------|
| 1    | 11.457  | 9718.85449 | 149.14948 | 51.0610 |
| 2    | 17.104  | 9314.95117 | 95.91405  | 48.9390 |

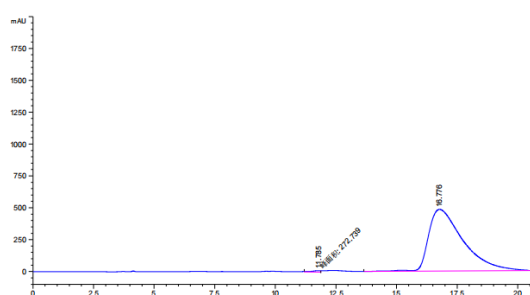

| Peak | RetTime | Area      | Height    | Area    |
|------|---------|-----------|-----------|---------|
| 1    | 11.785  | 272.73871 | 10.67186  | 0.5661  |
| 2    | 16.776  | 17803.8   | 483.92004 | 99.4339 |



**2-(1<sup>2,3</sup>,5<sup>2,7</sup>-tetrapropoxy-1<sup>4</sup>-(2,2,2-triphenylacetoxy)-1,3,5,7(1,3)-  
tetrabenzenacyclooctaphane-1<sup>5</sup>-carboxamido)pyridine 1-oxide (3ah)**

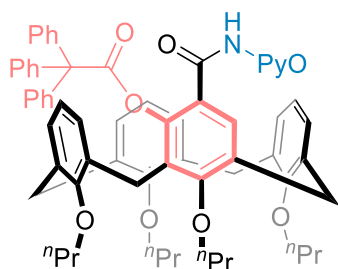

Yield: 76.1 mg (75%), White solid, mp: 145 °C.

<sup>1</sup>H NMR (600 MHz, CDCl<sub>3</sub>) δ 10.34 (s, 1H), 8.48 (d, *J* = 7.2 Hz, 1H), 8.23 (d, *J* = 3.0 Hz, 1H), 7.44 (s, 1H), 7.40 (d, *J* = 7.8 Hz, 6H), 7.36 (br, 1H), 7.20-6.91 (m, 12H), 6.87 (t, *J* = 7.4 Hz, 1H), 6.28 (t, *J* = 7.5 Hz, 1H), 6.15 (dd, *J* = 14.1, 7.0 Hz, 3H), 6.08 (d, *J* = 7.3 Hz, 1H), 5.83 (d, *J* = 7.3 Hz, 1H), 4.50-4.34 (m, 3H), 4.04 (dt, *J* = 8.7, 5.7 Hz, 2H), 3.95 (dd, *J* = 8.9, 7.3 Hz, 2H), 3.79-3.53 (m, 4H), 3.51-3.39 (m, 1H), 3.27-3.15 (m, 1H), 3.12 (d, *J* = 13.1 Hz, 2H), 2.69 (d, *J* = 14.0 Hz, 1H), 1.97-1.71 (m, 8H), 1.06 (dt, *J* = 15.1, 7.4 Hz, 6H), 0.88 (td, *J* = 7.4, 3.0 Hz, 6H). <sup>13</sup>C NMR (151 MHz, CDCl<sub>3</sub>) δ 171.9, 165.1, 162.0, 157.8, 155.1, 155.0, 146.1, 144.4, 142.3, 137.0, 136.8, 136.7, 134.9, 133.4, 132.9, 131.9, 131.83, 131.80, 130.6, 128.9, 128.8, 128.7, 127.8, 127.7, 127.5, 127.4, 127.39, 126.8, 122.3, 122.2, 121.9, 121.8, 118.4, 114.8, 76.9, 76.6, 76.4, 68.1, 60.3, 30.89, 30.85, 30.6, 23.4, 23.2, 23.1, 22.95, 22.92, 10.68, 10.67, 9.8, 9.7. HRMS (ESI): *m/z* [M+H]<sup>+</sup> calcd for [C<sub>66</sub>H<sub>67</sub>N<sub>2</sub>O<sub>8</sub>]<sup>+</sup> requires 1015.4897, found 1015.4895. [α]<sub>D</sub><sup>25</sup> = +27 (c = 0.1, CH<sub>2</sub>Cl<sub>2</sub>). The product was analyzed by HPLC to determine the enantiomeric excess: >99% ee (CHIRALPAK IC-H, hexane/*i*-PrOH = 90/10, detector: 254 nm, T = 25 °C, flow rate: 1 mL/min), *t*<sub>1</sub> (major) = 35.320 min, *t*<sub>2</sub> (minor) = 25.867 min

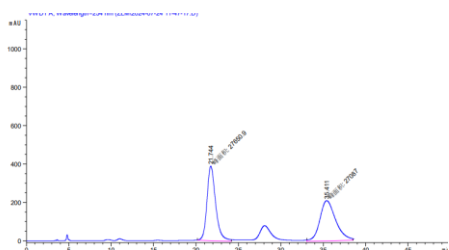

| Peak | RetTime | Area    | Height    | Area    |
|------|---------|---------|-----------|---------|
| 1    | 21.743  | 25996.6 | 382.59467 | 49.9607 |
| 2    | 35.411  | 26037.5 | 205.55771 | 50.0393 |

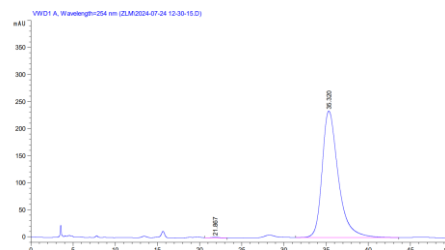

| Peak | RetTime | Area     | Height    | Area    |
|------|---------|----------|-----------|---------|
| 1    | 21.867  | 64.27583 | 1.03985   | 0.2067  |
| 2    | 35.320  | 31032.4  | 233.59198 | 99.7933 |

**2-(1<sup>4</sup>-(2,2-diphenylacetoxy)-1<sup>2</sup>,3<sup>2</sup>,5<sup>2</sup>,7<sup>2</sup>-tetrapropoxy-1,3,5,7(1,3)-  
tetrabenzenacyclooctaphane-1<sup>5</sup>-carboxamido)pyridine 1-oxide (3ai)**

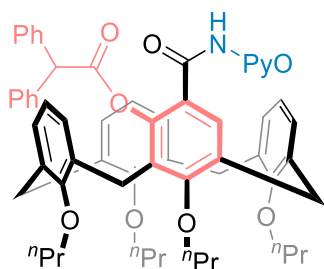

Yield: 66.6 mg (71%), White solid, mp: 132 °C.

<sup>1</sup>H NMR (600 MHz, CDCl<sub>3</sub>) δ 10.90 (s, 1H), 8.42 (d, *J* = 7.6 Hz, 1H), 8.22 (d, *J* = 6.1 Hz, 1H), 7.55 (s, 1H), 7.44 (d, *J* = 7.3 Hz, 2H), 7.35 (d, *J* = 7.4 Hz, 2H), 7.27 (dt, *J* = 30.1, 7.6 Hz, 4H), 7.17 (t, *J* = 7.3 Hz, 1H), 7.08 (dt, *J* = 25.0, 7.1 Hz, 3H), 7.00-6.85 (m, 3H), 6.78 (t, *J* = 7.3 Hz, 1H), 6.31 (ddt, *J* = 21.5, 15.5, 7.9 Hz, 5H), 6.11 (d, *J* = 7.3 Hz, 1H), 5.67 (s, 1H), 4.48-4.37 (m, 3H), 4.12-3.99 (m, 2H), 3.93 (dd, *J* = 15.1, 7.4 Hz, 3H), 3.81-3.59 (m, 3H), 3.53 (dd, *J* = 16.6, 7.2 Hz, 1H), 3.24 (d, *J* = 13.7 Hz, 1H), 3.15 (d, *J* = 12.9 Hz, 2H), 2.94 (d, *J* = 14.1 Hz, 1H), 2.00-1.83 (m, 6H), 1.88-1.69 (m, 2H), 1.26 (s, 1H), 1.03 (dt, *J* = 26.6, 7.4 Hz, 6H), 0.91 (t, *J* = 7.5 Hz, 6H). <sup>13</sup>C NMR (151 MHz, CDCl<sub>3</sub>) δ 171.1, 164.1, 162.3, 157.6, 155.5, 155.4, 145.7, 144.5, 138.1, 137.8, 136.9, 136.6, 136.3, 135.1, 134.0, 133.6, 132.5, 132.1, 131.3, 129.7, 128.9, 128.7, 128.67, 128.59, 128.2, 128.0, 127.9, 127.77, 127.72, 127.6, 127.4, 127.1, 122.4, 122.2, 121.9, 120.9, 118.4, 115.0, 76.9, 76.6, 76.5, 56.4, 31.0, 30.9, 30.7, 23.4, 23.2, 23.1, 23.0, 10.6, 10.5, 10.0, 9.9. HRMS (ESI): *m/z* [M+H]<sup>+</sup>calcd for [C<sub>60</sub>H<sub>63</sub>N<sub>2</sub>O<sub>8</sub>]<sup>+</sup> requires 939.4584, found 939.4585. [α]<sub>D</sub><sup>25</sup> = +39 (c = 0.1, CH<sub>2</sub>Cl<sub>2</sub>). The product was analyzed by HPLC to determine the enantiomeric excess: 99% ee (CHIRALPAK AD-H, hexane/*i*-PrOH = 95/5, detector: 254 nm, T = 25 °C, flow rate: 1 mL/min), *t*<sub>1</sub> (major) = 22.167 min, *t*<sub>2</sub> (minor) = 19.830 min.

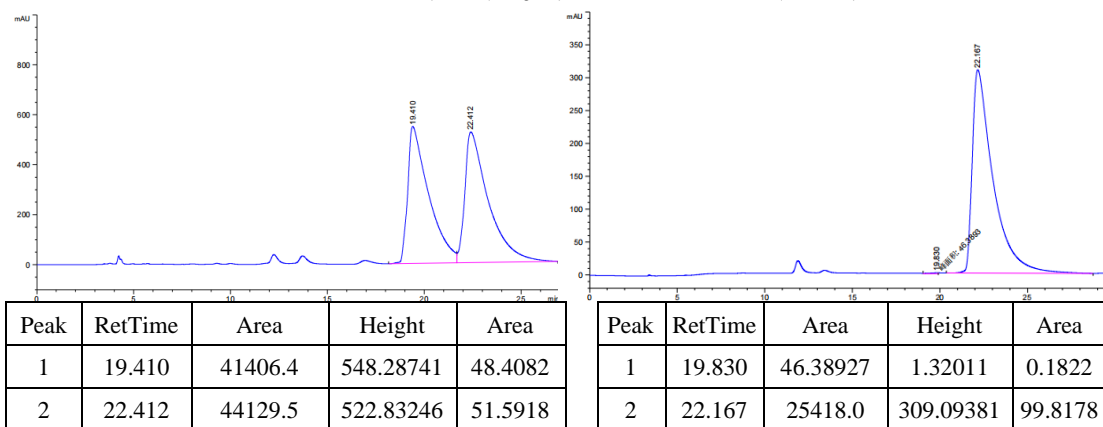

**2-(1<sup>4</sup>-(2,2-bis(4-chlorophenyl)acetoxy)-1<sup>2</sup>,3<sup>2</sup>,5<sup>2</sup>,7<sup>2</sup>-tetrapropoxy-1,3,5,7(1,3)-  
tetrabenzenacyclooctaphane-1<sup>5</sup>-carboxamido)pyridine 1-oxide (3aj)**

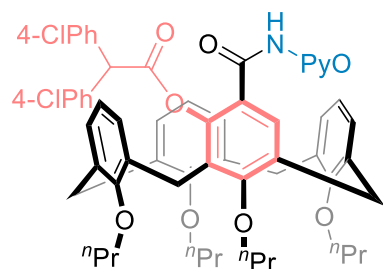

Yield: 73.5 mg (73%), White solid, mp: 140 °C.

<sup>1</sup>H NMR (600 MHz, CDCl<sub>3</sub>) δ 10.80 (s, 1H), 8.37 (d, *J* = 8.1 Hz, 1H), 8.18 (d, *J* = 6.3 Hz, 1H), 7.52 (s, 1H), 7.34 (dd, *J* = 15.5, 7.8 Hz, 3H), 7.27 (s, 1H), 7.22 (d, *J* = 8.2 Hz, 2H), 7.07 (d, *J* = 8.4 Hz, 2H), 7.01-6.92 (m, 2H), 6.90 (s, 1H), 6.77 (d, *J* = 6.9 Hz, 1H), 6.38 (t, *J* = 7.4 Hz, 1H), 6.31 (dd, *J* = 16.7, 8.0 Hz, 4H), 6.13 (d, *J* = 7.2 Hz, 1H), 5.57 (s, 1H), 4.50-4.38 (m, 3H), 4.03 (ddd, *J* = 31.6, 17.8, 8.0 Hz, 3H), 3.96-3.88 (m, 2H), 3.88-3.63 (m, 3H), 3.56 (dd, *J* = 16.5, 7.1 Hz, 1H), 3.24 (d, *J* = 13.7 Hz, 1H), 3.16 (dd, *J* = 13.5, 6.7 Hz, 2H), 2.89 (d, *J* = 14.1 Hz, 1H), 1.98-1.75 (m, 8H), 1.04 (dt, *J* = 17.8, 7.4 Hz, 6H), 0.92 (t, *J* = 7.4 Hz, 6H). <sup>13</sup>C NMR (151 MHz, CDCl<sub>3</sub>) δ 170.4, 163.9, 162.3, 157.4, 155.6, 145.3, 144.2, 136.9, 136.4, 136.2, 135.9, 135.2, 134.2, 134.0, 133.7, 133.3, 132.5, 131.9, 131.0, 130.1, 129.9, 129.8, 128.9, 128.7, 128.6, 128.1, 127.9, 127.6, 127.5, 122.4, 122.2, 122.0, 120.8, 118.5, 114.9, 76.7, 76.6, 55.0, 31.0, 30.9, 30.7, 23.4, 23.2, 23.10, 23.09, 10.63, 10.59, 10.0, 9.9. HRMS (ESI): *m/z* [M+H]<sup>+</sup> calcd for [C<sub>60</sub>H<sub>61</sub>Cl<sub>2</sub>N<sub>2</sub>O<sub>8</sub>]<sup>+</sup> requires 1007.3808, found 1007.3815. [α]<sub>D</sub><sup>25</sup> = +34 (c = 0.1, CH<sub>2</sub>Cl<sub>2</sub>). The product was analyzed by HPLC to determine the enantiomeric excess: >99% ee (CHIRALPAK IC-H, hexane/*i*-PrOH = 90/10, detector: 254 nm, T = 25 °C, flow rate: 1 mL/min), *t*<sub>1</sub> (major) = 12.265 min, *t*<sub>2</sub> (minor) = 10.591 min.

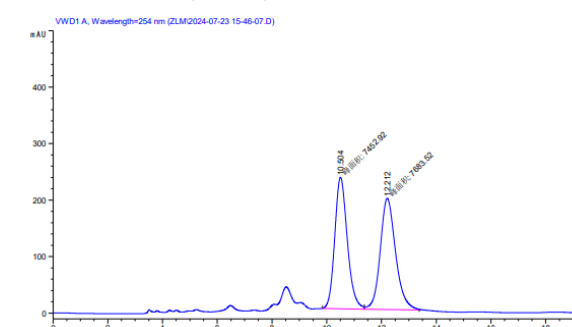

| Peak | RetTime | Area       | Height    | Area    |
|------|---------|------------|-----------|---------|
| 1    | 10.504  | 7452.92139 | 232.79915 | 49.2383 |
| 2    | 35.320  | 7683.51904 | 196.75146 | 50.7617 |

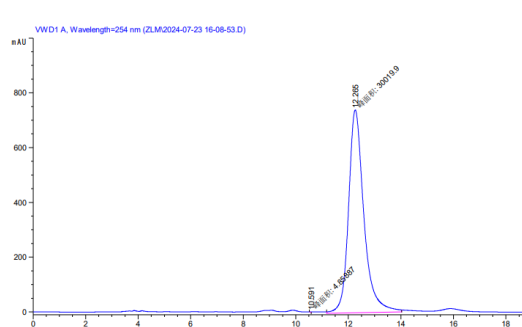

| Peak | RetTime | Area    | Height    | Area    |
|------|---------|---------|-----------|---------|
| 1    | 10.591  | 4.85887 | 1.68972   | 0.0162  |
| 2    | 12.265  | 30019.9 | 740.54327 | 99.9838 |

**(S)-2-(1<sup>4</sup>-((2-phenylpropanoyl)oxy)-1<sup>2</sup>,3<sup>2</sup>,5<sup>2</sup>,7<sup>2</sup>-tetrapropoxy-1,3,5,7(1,3)-  
tetrabenzenacyclooctaphane-1<sup>5</sup>-carboxamido)pyridine 1-oxide (3ak)**

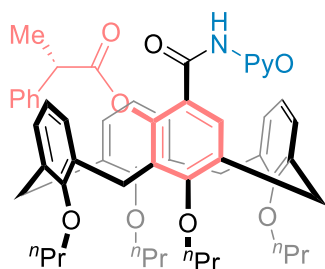

Yield: 56.1 mg (64%), White solid, mp: 123 °C.

<sup>1</sup>H NMR (600 MHz, CDCl<sub>3</sub>) δ 10.72 (s, 1H), 8.46 (d, *J* = 8.1 Hz, 1H), 8.27 (d, *J* = 6.2 Hz, 1H), 7.59 (s, 1H), 7.34 (dd, *J* = 10.9, 3.8 Hz, 3H), 7.18-6.96 (m, 6H), 6.85 (t, *J* = 7.4 Hz, 1H), 6.31 (dt, *J* = 11.1, 7.6 Hz, 2H), 6.19 (dd, *J* = 22.7, 6.8 Hz, 4H), 4.48-4.38 (m, 3H), 4.30 (d, *J* = 7.1 Hz, 1H), 4.05 (dt, *J* = 10.7, 5.3 Hz, 2H), 3.94 (dd, *J* = 16.5, 8.5 Hz, 3H), 3.74-3.58 (m, 3H), 3.53 (d, *J* = 8.6 Hz, 1H), 3.24 (d, *J* = 13.8 Hz, 1H), 3.15 (d, *J* = 13.5 Hz, 2H), 2.94 (d, *J* = 13.2 Hz, 1H), 2.00-1.75 (m, 8H), 1.60 (d, *J* = 7.1 Hz, 3H), 1.05 (dt, *J* = 19.9, 7.4 Hz, 6H), 0.89 (dd, *J* = 13.1, 7.4 Hz, 6H). <sup>13</sup>C NMR (151 MHz, CDCl<sub>3</sub>) δ 173.0, 164.2, 162.5, 157.8, 155.34, 155.32, 145.9, 144.6, 139.7, 137.0, 136.8, 136.6, 135.1, 133.7, 133.3, 132.3, 131.9, 131.4, 129.4, 128.9, 128.8, 128.3, 127.91, 127.89, 127.84, 127.80, 127.6, 127.4, 127.1, 122.45, 122.42, 121.9, 120.9, 118.4, 115.1, 77.0, 76.7, 76.6, 45.5, 31.0, 30.9, 30.7, 23.5, 23.3, 23.0, 18.5, 10.73, 10.67, 9.9, 9.8. HRMS (ESI): *m/z* [M+H]<sup>+</sup> calcd for [C<sub>55</sub>H<sub>61</sub>N<sub>2</sub>O<sub>8</sub>]<sup>+</sup> requires 877.4428, found 877.4426. [α]<sub>D</sub><sup>25</sup> = +89 (c = 0.1, CH<sub>2</sub>Cl<sub>2</sub>). The product was analyzed by HPLC to determine the enantiomeric excess: >99% de (CHIRALPAK AD-H, hexane/*i*-PrOH = 95/5, detector: 254 nm, T = 25 °C, flow rate: 1 mL/min), t<sub>1</sub> (major) = 19.351 min, t<sub>2</sub> (minor) = 13.577 min.

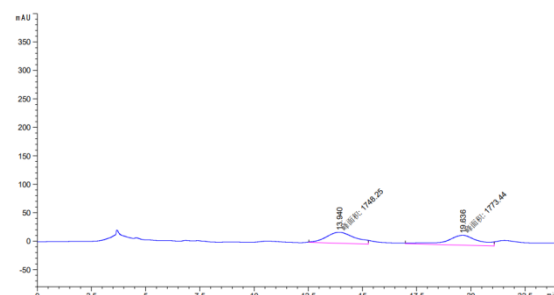

| Peak | RetTime | Area       | Height   | Area    |
|------|---------|------------|----------|---------|
| 1    | 13.940  | 1748.24609 | 19.17593 | 49.6423 |
| 2    | 19.636  | 1773.43933 | 17.45177 | 50.3577 |

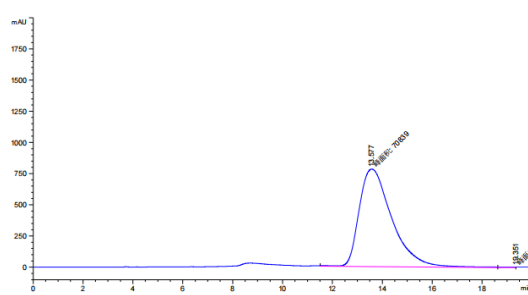

| Peak | RetTime | Area      | Height    | Area    |
|------|---------|-----------|-----------|---------|
| 1    | 13.577  | 70839.0   | 780.81744 | 99.7801 |
| 2    | 19.351  | 156.12155 | 3.82582   | 0.2199  |

**2-(1<sup>2</sup>,3<sup>2</sup>,5<sup>2</sup>,7<sup>2</sup>-tetrapropoxy-1<sup>4</sup>-(2-propylpentanoyl)oxy)-1,3,5,7(1,3)-  
tetrabenzenacyclooctaphane-1<sup>5</sup>-carboxamido)pyridine 1-oxide (3aI)**

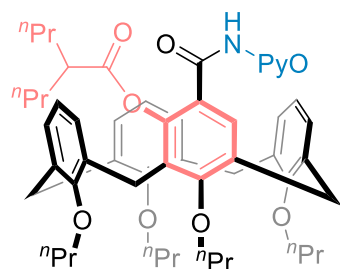

Yield: 67.9 mg (78%), White solid, mp: 116 °C.

<sup>1</sup>H NMR (600 MHz, CDCl<sub>3</sub>) δ 10.87 (s, 1H), 8.62 (dd, *J* = 8.5, 1.6 Hz, 1H), 8.29 (dd, *J* = 6.5, 0.9 Hz, 1H), 7.65 (s, 1H), 7.41-7.34 (m, 1H), 7.09 (d, *J* = 7.5 Hz, 2H), 7.04-6.98 (m, 1H), 6.91 (t, *J* = 7.4 Hz, 1H), 6.28 (t, *J* = 7.6 Hz, 2H), 6.21 (d, *J* = 7.2 Hz, 1H), 6.15 (t, *J* = 6.6 Hz, 3H), 4.50-4.40 (m, 3H), 4.21-4.06 (m, 3H), 4.03-3.96 (m, 2H), 3.75-3.59 (m, 4H), 3.39 (d, *J* = 14.0 Hz, 1H), 3.26 (d, *J* = 13.7 Hz, 1H), 3.16 (dd, *J* = 13.4, 2.3 Hz, 2H), 3.02-2.91 (m, 1H), 2.02-1.81 (m, 8H), 1.80-1.66 (m, 2H), 1.61-1.45 (m, 2H), 1.45-1.18 (m, 4H), 1.08 (dt, *J* = 16.4, 7.4 Hz, 6H), 0.94-0.85 (m, 6H), 0.82 (t, *J* = 7.3 Hz, 3H), 0.75 (t, *J* = 7.3 Hz, 3H). <sup>13</sup>C NMR (151 MHz, CDCl<sub>3</sub>) δ 174.8, 164.6, 162.5, 157.9, 155.2, 155.1, 146.0, 144.8, 137.1, 136.95, 136.90, 135.1, 133.5, 133.3, 132.0, 131.8, 131.7, 129.3, 128.9, 127.9, 127.8, 127.4, 127.3, 122.5, 122.4, 121.9, 121.3, 118.5, 115.0, 76.95, 76.93, 76.5, 44.7, 33.8, 33.5, 31.0, 30.9, 30.7, 23.9, 23.5, 23.4, 23.1, 23.0, 20.4, 20.3, 14.0, 13.98, 10.8, 10.7, 9.87, 9.80. HRMS (ESI): *m/z* [M+H]<sup>+</sup> calcd for [C<sub>54</sub>H<sub>67</sub>N<sub>2</sub>O<sub>8</sub>]<sup>+</sup> requires 871.4897, found 871.4893. [α]<sub>D</sub><sup>25</sup> = +42 (c = 0.1, CH<sub>2</sub>Cl<sub>2</sub>). The product was analyzed by HPLC to determine the enantiomeric excess: >99% ee (CHIRALPAK AD-H, hexane/*i*-PrOH = 95/5, detector: 254 nm, T = 25 °C, flow rate: 1 mL/min), *t*<sub>1</sub> (major) = 9.376 min, *t*<sub>2</sub> (minor) = 8.487 min.

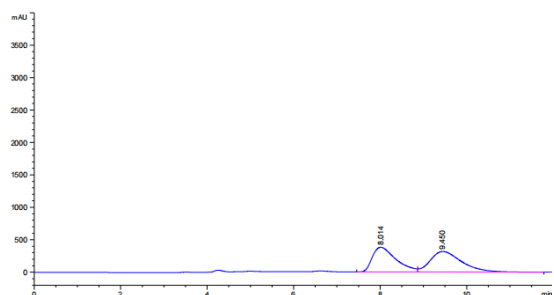

| Peak | RetTime | Area    | Height    | Area    |
|------|---------|---------|-----------|---------|
| 1    | 8.014   | 14455.6 | 379.66327 | 47.4317 |
| 2    | 9.450   | 16021.1 | 316.71589 | 52.5683 |

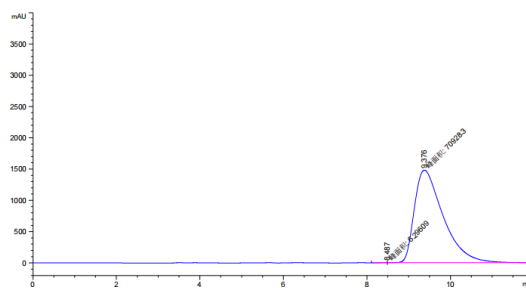

| Peak | RetTime | Area    | Height     | Area    |
|------|---------|---------|------------|---------|
| 1    | 8.487   | 6.29609 | 1.14416    | 0.0089  |
| 2    | 9.376   | 70928.3 | 1479.99548 | 99.9911 |

**2-(1<sup>4</sup>-((2-ethylbutanoyl)oxy)-1<sup>2</sup>,3<sup>2</sup>,5<sup>2</sup>,7<sup>2</sup>-tetrapropoxy-1,3,5,7(1,3)-  
tetraabenzenacyclooctaphane-1<sup>5</sup>-carboxamido)pyridine 1-oxide (3am)**

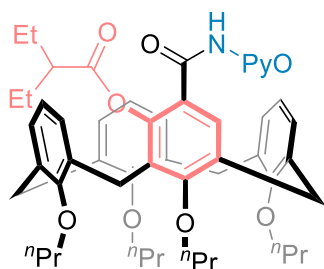

Yield: 57.3 mg (54%), White solid, mp: 112 °C.

<sup>1</sup>H NMR (600 MHz, CDCl<sub>3</sub>) δ 10.90 (s, 1H), 8.63 (dd, *J* = 8.5, 1.5 Hz, 1H), 8.34 (dd, *J* = 6.5, 0.8 Hz, 1H), 7.68 (s, 1H), 7.44-7.35 (m, 1H), 7.09 (d, *J* = 7.4 Hz, 2H), 7.08-6.98 (m, 1H), 6.91 (t, *J* = 7.5 Hz, 1H), 6.28 (td, *J* = 7.6, 2.4 Hz, 2H), 6.22 (d, *J* = 7.0 Hz, 1H), 6.16 (dd, *J* = 8.2, 3.8 Hz, 3H), 4.52-4.40 (m, 3H), 4.26-4.08 (m, 3H), 4.01 (dd, *J* = 15.0, 6.8 Hz, 2H), 3.85-3.50 (m, 4H), 3.41 (d, *J* = 14.0 Hz, 1H), 3.27 (d, *J* = 13.7 Hz, 1H), 3.16 (dd, *J* = 13.4, 4.1 Hz, 2H), 2.93-2.81 (m, 1H), 1.97 (dp, *J* = 15.3, 7.7 Hz, 4H), 1.92-1.84 m, 4H), 1.83-1.73 (m, 2H), 1.71-1.59 (m, 2H), 1.13-1.05 (m, 6 H), 0.97-0.87 (m, 9H), 0.84 (t, *J* = 7.5 Hz, 3H). <sup>13</sup>C NMR (151 MHz, CDCl<sub>3</sub>) δ 174.4, 164.5, 162.5, 157.8, 155.2, 155.1, 146.0, 144.7, 137.1, 136.84, 136.82, 135.0, 133.4, 133.3, 132.0, 131.8, 131.6, 129.4, 128.9, 128.2, 127.80, 127.77, 127.4, 127.3, 122.5, 122.3, 121.9, 121.0, 118.5, 115.0, 76.5, 47.7, 30.92, 30.90, 30.7, 29.5, 27.1, 24.1, 23.9, 23.7, 23.44, 23.37, 23.0, 22.9, 11.4, 11.3, 10.7, 10.7, 9.8, 9.7. HRMS (ESI): *m/z* [M+H]<sup>+</sup> calcd for [C<sub>52</sub>H<sub>63</sub>N<sub>2</sub>O<sub>8</sub>]<sup>+</sup> requires 843.4584, found 843.4602. [α]<sub>D</sub><sup>25</sup> = +23 (c = 0.1, CH<sub>2</sub>Cl<sub>2</sub>). The product was analyzed by HPLC to determine the enantiomeric excess: >99% ee (CHIRALPAK IC-H, hexane/*i*-PrOH = 90/10, detector: 254 nm, T = 25 °C, flow rate: 1 mL/min), *t*<sub>1</sub> (major) = 18.395 min, *t*<sub>2</sub> (minor) = 15.950 min.

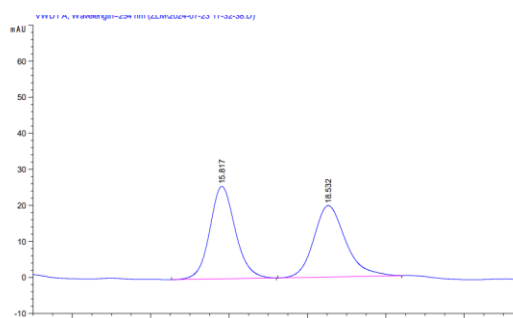

| Peak | RetTime | Area       | Height   | Area    |
|------|---------|------------|----------|---------|
| 1    | 15.817  | 1162.22095 | 25.67161 | 51.0181 |
| 2    | 18.532  | 1115.83569 | 19.79645 | 48.9819 |

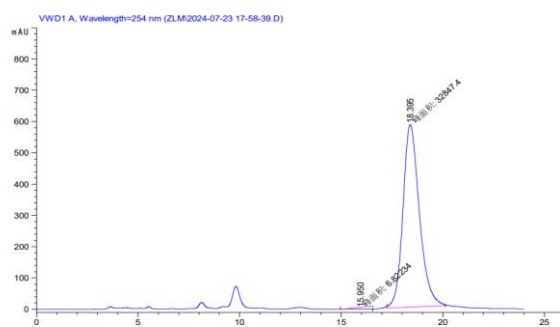

| Peak | RetTime | Area    | Height    | Area    |
|------|---------|---------|-----------|---------|
| 1    | 15.950  | 6.82234 | 4.84642   | 0.0208  |
| 2    | 18.395  | 32847.4 | 583.38098 | 99.9792 |

**2-(1<sup>4</sup>-((cyclobutanecarbonyl)oxy)-1<sup>2</sup>,3<sup>2</sup>,5<sup>2</sup>,7<sup>2</sup>-tetrapropoxy-1,3,5,7(1,3)-  
tetrabenzencyclooctaphane-1<sup>5</sup>-carboxamido)pyridine 1-oxide (3an)**

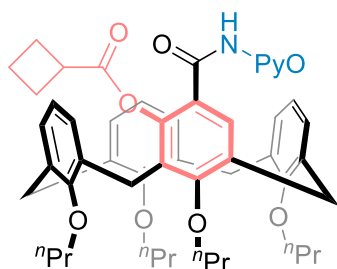

Yield: 44.6 mg (54%), White solid, mp: 118 °C.

<sup>1</sup>H NMR (600 MHz, CDCl<sub>3</sub>) δ 10.83 (s, 1H), 8.60 (d, *J* = 8.0 Hz, 1H), 8.28 (d, *J* = 6.3 Hz, 1H), 7.59 (s, 1H), 7.36 (t, *J* = 7.9 Hz, 1H), 7.06-6.90 (m, 3H), 6.81 (t, *J* = 7.4 Hz, 1H), 6.36 (dd, *J* = 15.2, 7.6 Hz, 2H), 6.31-6.22 (m, 4H), 4.51-4.39 (m, 3H), 4.19 (d, *J* = 13.9 Hz, 1H), 4.15-4.03 (m, 2H), 3.96 (dd, *J* = 8.9, 7.1 Hz, 2H), 3.78-3.63 (m, 4H), 3.34 (d, *J* = 14.0 Hz, 1H), 3.25 (d, *J* = 13.7 Hz, 1H), 3.16 (dd, *J* = 13.4, 5.2 Hz, 2H), 2.49-2.17 (m, 4H), 2.12-1.77 (m, 11H), 1.06 (dt, *J* = 11.6, 7.4 Hz, 6H), 0.93 (q, *J* = 7.4 Hz, 6H). <sup>13</sup>C NMR (151 MHz, CDCl<sub>3</sub>) δ 173.9, 164.3, 162.3, 157.5, 155.55, 155.52, 146.1, 144.8, 137.0, 136.5, 136.4, 134.7, 134.0, 133.9, 132.5, 132.1, 131.1, 129.6, 128.7, 128.1, 128.08, 127.9, 127.6, 122.38, 122.36, 122.0, 120.7, 118.5, 115.1, 76.8, 76.5, 38.1, 31.0, 30.98, 30.7, 25.5, 25.1, 23.5, 23.3, 23.2, 23.08, 18.5, 10.7, 10.6, 10.0, 9.9. HRMS (ESI): *m/z* [M+H]<sup>+</sup> calcd for [C<sub>51</sub>H<sub>59</sub>N<sub>2</sub>O<sub>8</sub>]<sup>+</sup> requires 827.4271, found 827.4281. [α]<sub>D</sub><sup>25</sup> = +18 (c = 0.1, CH<sub>2</sub>Cl<sub>2</sub>). The product was analyzed by HPLC to determine the enantiomeric excess: 99% ee (CHIRALPAK AD-H, hexane/*i*-PrOH = 95/5, detector: 254 nm, T = 25 °C, flow rate: 1 mL/min), *t*<sub>1</sub> (major) = 13.838 min, *t*<sub>2</sub> (minor) = 11.545 min.

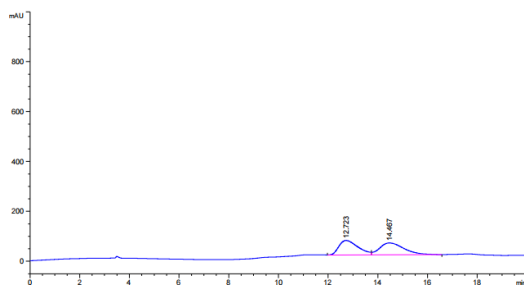

| Peak | RetTime | Area       | Height   | Area    |
|------|---------|------------|----------|---------|
| 1    | 12.723  | 3079.31274 | 57.93274 | 48.9534 |
| 2    | 14.467  | 3210.98706 | 47.29651 | 51.0466 |

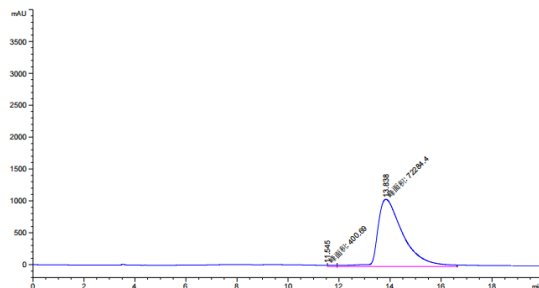

| Peak | RetTime | Area      | Height     | Area    |
|------|---------|-----------|------------|---------|
| 1    | 11.545  | 400.68967 | 17.87404   | 0.5513  |
| 2    | 13.838  | 72284.4   | 1052.42639 | 99.4487 |

**2-(1<sup>4</sup>-((3-methylbutanoyl)oxy)-1<sup>2</sup>,3<sup>2</sup>,5<sup>2</sup>,7<sup>2</sup>-tetrapropoxy-1,3,5,7(1,3)-  
tetrabenzenacyclooctaphane-1<sup>5</sup>-carboxamido)pyridine 1-oxide (3ao)**

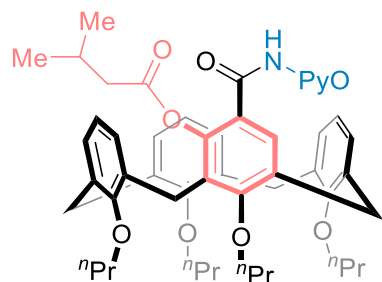

Yield: 43.8 mg (52%), White solid, mp: 113 °C.

<sup>1</sup>H NMR (600 MHz, CDCl<sub>3</sub>) δ 10.90 (s, 1H), 8.60 (d, *J* = 8.2 Hz, 1H), 8.29 (d, *J* = 6.0 Hz, 1H), 7.61 (s, 1H), 7.36 (t, *J* = 7.9 Hz, 1H), 7.08-6.91 (m, 3H), 6.81 (t, *J* = 7.5 Hz, 1H), 6.43-6.09 (m, 6H), 4.51-4.39 (m, 3H), 4.19 (d, *J* = 14.0 Hz, 1H), 4.15-4.03 (m, 2H), 3.96 (dd, *J* = 13.9, 6.0 Hz, 2H), 3.89-3.49 (m, 4H), 3.34 (d, *J* = 14.0 Hz, 1H), 3.26 (d, *J* = 13.6 Hz, 1H), 3.16 (dd, *J* = 13.5, 2.8 Hz, 2H), 2.81-2.60 (m, 2H), 2.25-2.15 (m, 1H), 2.01-1.80 (m, 8H), 1.10-1.02 (m, 6H), 1.00-0.89 (m, 12H). <sup>13</sup>C NMR (151 MHz, CDCl<sub>3</sub>) δ 171.6, 164.3, 162.4, 157.5, 155.53, 155.51, 146.2, 144.8, 137.0, 136.5, 136.4, 134.7, 134.0, 133.9, 132.5, 132.1, 131.1, 129.7, 128.8, 128.1, 128.0, 127.9, 127.6, 122.4, 122.3, 122.0, 120.6, 118.5, 115.0, 76.6, 42.9, 31.00, 30.98, 30.7, 29.4, 25.1, 24.7, 23.5, 23.3, 23.1, 23.08, 22.5, 22.3, 10.7, 10.6, 10.0, 9.9. HRMS (ESI): *m/z* [M+H]<sup>+</sup> calcd for [C<sub>51</sub>H<sub>61</sub>N<sub>2</sub>O<sub>8</sub>]<sup>+</sup> requires 829.4428, found 829.4430. [α]<sub>D</sub><sup>25</sup> = +34 (c = 0.1, CH<sub>2</sub>Cl<sub>2</sub>). The product was analyzed by HPLC to determine the enantiomeric excess: 97% ee (CHIRALPAK IC-H, hexane/*i*-PrOH = 90/10, detector: 254 nm, T = 25 °C, flow rate: 1 mL/min), *t*<sub>1</sub> (major) = 17.237 min, *t*<sub>2</sub> (minor) = 14.766 min.

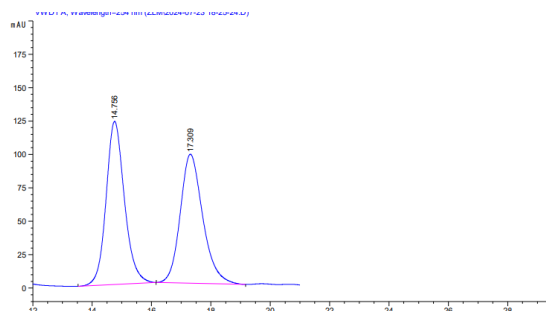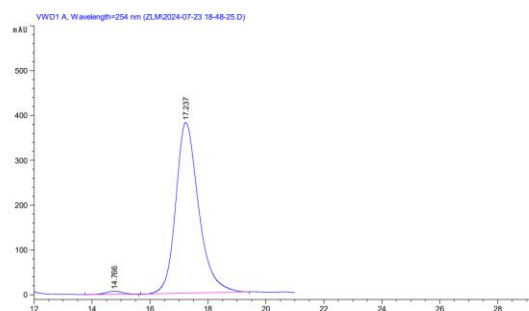

| Peak | RetTime | Area       | Height    | Area    |
|------|---------|------------|-----------|---------|
| 1    | 14.756  | 5249.07471 | 122.06635 | 50.7166 |
| 2    | 17.309  | 5100.74316 | 96.54317  | 49.2834 |

| Peak | RetTime | Area     | Height    | Area    |
|------|---------|----------|-----------|---------|
| 1    | 14.766  | 67.21010 | 6.95162   | 1.3322  |
| 2    | 17.237  | 20810.3  | 380.16534 | 98.6678 |



**2-(1<sup>4</sup>-((3,3-dimethylbutanoyl)oxy)-1<sup>2</sup>,3<sup>2</sup>,5<sup>2</sup>,7<sup>2</sup>-tetrapropoxy-1,3,5,7(1,3)-  
tetrabenzenacyclooctaphane-1<sup>5</sup>-carboxamido)pyridine 1-oxide (3ap)**

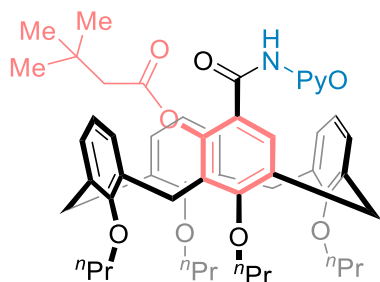

Yield: 52.2 mg (62%), White solid, mp: 116 °C.

<sup>1</sup>H NMR (600 MHz, CDCl<sub>3</sub>) δ 10.88 (s, 1H), 8.61 (d, *J* = 8.2 Hz, 1H), 8.29 (d, *J* = 6.2 Hz, 1H), 7.61 (s, 1H), 7.36 (t, *J* = 7.9 Hz, 1H), 6.99 (dd, *J* = 13.7, 6.6 Hz, 3H), 6.82 (t, *J* = 7.4 Hz, 1H), 6.40-6.18 (m, 6H), 4.51-4.39 (m, 3H), 4.19 (d, *J* = 14.0 Hz, 1H), 4.15-4.04 (m, 2H), 4.00-3.92 (m, 2H), 3.81-3.57 (m, 4H), 3.39 (d, *J* = 14.0 Hz, 1H), 3.25 (d, *J* = 13.7 Hz, 1H), 3.16 (dd, *J* = 13.4, 3.9 Hz, 2H), 2.72 (dd, *J* = 40.3, 16.0 Hz, 2H), 2.03-1.81 (m, 8H), 1.11 -0.99 (m, 16H), 0.97-0.87 (m, 6H). <sup>13</sup>C NMR (151 MHz, CDCl<sub>3</sub>) δ 170.6, 164.4, 162.4, 157.6, 155.5, 155.4, 146.1, 144.8, 137.0, 136.6, 136.5, 134.7, 133.9, 133.8, 132.4, 132.0, 131.2, 129.6, 128.8, 128.05, 128.02, 127.9, 127.6, 122.4, 122.0, 120.8, 118.5, 115.0, 76.9, 76.6, 46.9, 31.00, 30.98, 30.7, 30.5, 29.4, 24.7, 23.5, 23.3, 23.1, 23.07, 10.7, 10.6, 10.0, 9.9. HRMS (ESI): *m/z* [M+H]<sup>+</sup> calcd for [C<sub>52</sub>H<sub>63</sub>N<sub>2</sub>O<sub>8</sub>]<sup>+</sup> requires 843.4584, found 843.4593. [α]<sub>D</sub><sup>25</sup> = +28 (c = 0.1, CH<sub>2</sub>Cl<sub>2</sub>). The product was analyzed by HPLC to determine the enantiomeric excess: 99% ee (CHIRALPAK AD-H, hexane/*i*-PrOH = 97/3, detector: 254 nm, T = 25 °C, flow rate: 1 mL/min), *t*<sub>1</sub> (major) = 11.031 min, *t*<sub>2</sub> (minor) = 9.053 min.

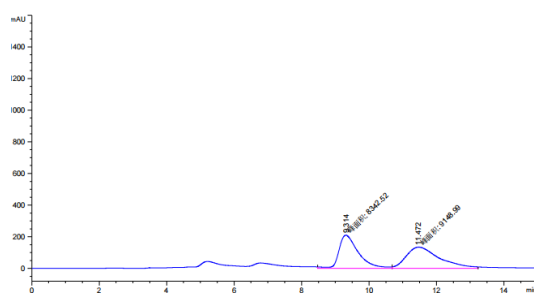

| Peak | RetTime | Area       | Height    | Area    |
|------|---------|------------|-----------|---------|
| 1    | 9.314   | 8342.52148 | 209.35483 | 47.6947 |
| 2    | 11.472  | 9148.99121 | 133.59216 | 52.3053 |

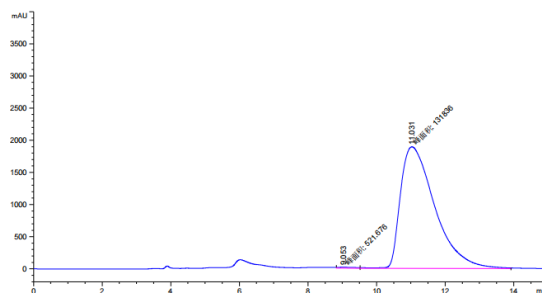

| Peak | RetTime | Area      | Height     | Area    |
|------|---------|-----------|------------|---------|
| 1    | 9.053   | 521.67603 | 14.43180   | 0.3941  |
| 2    | 11.031  | 131836    | 1889.42798 | 99.6059 |

**2-(14-(butyryloxy)-12,32,52,72-tetrapropoxy-1,3,5,7(1,3)-  
tetrabenzenacyclooctaphane-15-carboxamido)pyridine 1-oxide (3aq)**

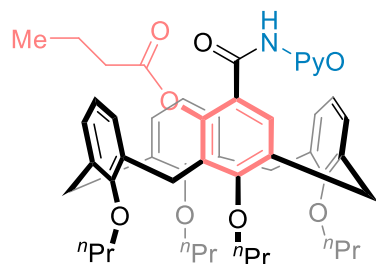

Yield: 25 mg (31%), Yellow solid, mp: 142 °C

**<sup>1</sup>H NMR** (600 MHz, CDCl<sub>3</sub>) δ 10.91 (s, 1H), 8.61 (dd, *J* = 8.5, 1.9 Hz, 1H), 8.29 (dd, *J* = 6.5, 1.5 Hz, 1H), 7.61 (s, 1H), 7.40–7.32 (m, 1H), 7.01–6.98 (m, 1H), 6.97–6.92 (m, 2H), 6.79 (t, *J* = 7.5 Hz, 1H), 6.40–6.35 (m, 2H), 6.33–6.27 (m, 4H), 4.49–4.42 (m, 3H), 4.20 (d, *J* = 14.0 Hz, 1H), 4.14–4.03 (m, 2H), 3.95 (t, *J* = 8.0 Hz, 2H), 3.78–3.70 (m, 4H), 3.32 (d, *J* = 14.0 Hz, 1H), 3.26 (d, *J* = 13.7 Hz, 1H), 3.17 (d, *J* = 3.8 Hz, 1H), 3.15 (d, *J* = 3.9 Hz, 1H), 2.85–2.72 (m, 2H), 1.97–1.92 (m, 4H), 1.90–1.85 (m, 4H), 1.78–1.72 (m, 2H), 1.08–1.03 (m, 6H), 0.9–0.91 (m, 9H). **<sup>13</sup>C NMR** (151 MHz, CDCl<sub>3</sub>) δ 172.2, 164.2, 162.4, 157.5, 155.6, 146.2, 144.8, 137.1, 136.4, 136.3, 134.7, 134.1, 134.0, 132.6, 132.1, 131.1, 129.8, 128.7, 128.7, 128.5, 128.1, 128.0, 127.7, 122.4, 122.3, 122.0, 120.5, 118.5, 115.1, 36.0, 31.0, 30.99, 30.7, 24.8, 23.4, 23.3, 23.2, 23.1, 18.0, 13.6, 10.6, 10.57, 10.0, 9.9. **HRMS** (ESI): *m/z* [M+K]<sup>+</sup> calcd for [C<sub>50</sub>H<sub>58</sub>N<sub>2</sub>O<sub>8</sub>K]<sup>+</sup> requires 853.3825, found 853.3832. [α]<sub>D</sub><sup>25</sup> = +22 (c = 0.1, CH<sub>2</sub>Cl<sub>2</sub>). The product was analyzed by HPLC to determine the enantiomeric excess: 96% ee (CHIRALPAK IC-H, hexane/*i*-PrOH = 90/10, detector: 254 nm, T = 25 °C, flow rate: 1 mL/min), *t*<sub>1</sub> (major) = 19.255 min, *t*<sub>2</sub> (minor) = 16.493 min.

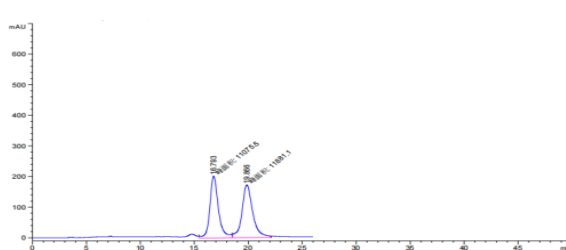

| Peak | RetTime | Area    | Height    | Area    |
|------|---------|---------|-----------|---------|
| 1    | 16.793  | 11075.5 | 201.88644 | 48.2453 |
| 2    | 19.866  | 11881.1 | 172.20108 | 51.7547 |

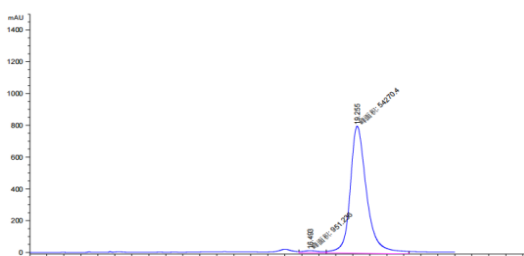

| Peak | RetTime | Area      | Height    | Area    |
|------|---------|-----------|-----------|---------|
| 1    | 16.493  | 951.23639 | 13.37805  | 1.7226  |
| 2    | 19.255  | 54270.4   | 799.63397 | 98.2774 |

**2-(1<sup>4</sup>-(benzyloxy)-1<sup>2</sup>,3<sup>2</sup>,5<sup>2</sup>,7<sup>2</sup>-tetrapropoxy-1,3,5,7(1,3)-tetrabenzenacyclooctaphane-1<sup>5</sup>-carboxamido)pyridine 1-oxide (3ar)**

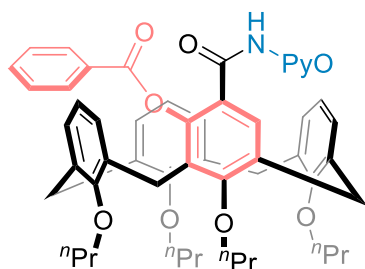

Yield: 85.6 mg (72%), grey solid, mp: 121 °C. <sup>1</sup>H NMR (600 MHz, CDCl<sub>3</sub>) δ 10.58 (s, 1H), 8.43 (dd, *J* = 8.5, 1.5 Hz, 1H), 8.25-8.16 (m, 3H), 7.61 (t, *J* = 7.4 Hz, 1H), 7.49 (t, *J* = 7.8 Hz, 2H), 7.42 (s, 1H), 7.27-7.20 (m, 1H), 6.95-6.81 (m, 3H), 6.73 (t, *J* = 7.4 Hz, 1H), 6.60-6.24 (m, 6H), 4.56-4.40 (m, 3H), 4.25 (d, *J* = 13.9 Hz, 1H), 4.13-3.97 (m, 2H), 3.92 (dd, *J* = 8.3, 7.2 Hz, 2H), 3.88-3.67 (m, 4H), 3.38 (d, *J* = 14.0 Hz, 1H), 3.27 (d, *J* = 13.6 Hz, 1H), 3.18 (t, *J* = 13.0 Hz, 2H), 2.00-1.81 (m, 8H), 1.05 (t, *J* = 7.4 Hz, 3H), 0.97 (ddd, *J* = 20.0, 10.0, 4.4 Hz, 9H). <sup>13</sup>C NMR (151 MHz, CDCl<sub>3</sub>) δ 165.0, 164.4, 161.8, 157.2, 155.9, 155.88, 146.4, 144.6, 136.9, 136.0, 135.8, 134.6, 134.4, 133.6, 133.0, 132.4, 131.0, 130.8, 129.0, 128.96, 128.6, 128.5, 128.48, 128.33, 128.30, 127.9, 127.6, 122.4, 122.2, 122.1, 121.5, 118.3, 114.9, 77.2, 76.7, 76.6, 31.1, 31.0, 30.7, 25.3, 23.4, 23.2, 23.17, 23.14, 10.5, 10.4, 10.1, 10.0. HRMS (ESI): *m/z* [M+H]<sup>+</sup> calcd for [C<sub>53</sub>H<sub>57</sub>N<sub>2</sub>O<sub>8</sub>]<sup>+</sup> requires 849.4115, found 849.4122. [α]<sub>D</sub><sup>25</sup> = +32 (c = 0.1, CH<sub>2</sub>Cl<sub>2</sub>). The product was analyzed by HPLC to determine the enantiomeric excess: 95% ee (CHIRALPAK IB-H, hexane/*i*-PrOH = 90/10, detector: 254 nm, T = 25 °C, flow rate: 1 mL/min), *t*<sub>1</sub> (major) = 18.013 min, *t*<sub>2</sub> (minor) = 15.945 min.

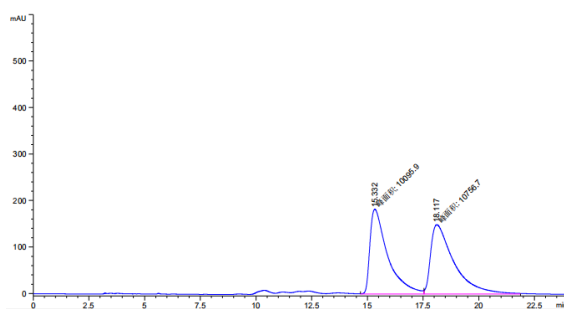

| Peak | RetTime | Area    | Height    | Area    |
|------|---------|---------|-----------|---------|
| 1    | 15.332  | 10095.9 | 182.10905 | 48.4155 |
| 2    | 18.117  | 10756.7 | 148.70924 | 51.5845 |

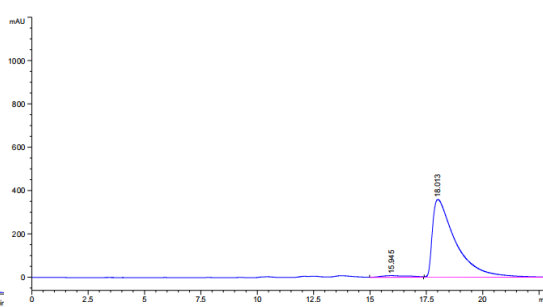

| Peak | RetTime | Area      | Height    | Area    |
|------|---------|-----------|-----------|---------|
| 1    | 15.945  | 682.77399 | 7.81819   | 2.6288  |
| 2    | 18.013  | 25289.6   | 357.24292 | 97.3712 |

**2-(1<sup>4</sup>-((4-methylbenzoyl)oxy)-1<sup>2</sup>,3<sup>2</sup>,5<sup>2</sup>,7<sup>2</sup>-tetrapropoxy-1,3,5,7(1,3)-  
tetrabenzenacyclooctaphane-1<sup>5</sup>-carboxamido)pyridine 1-oxide (3as)**

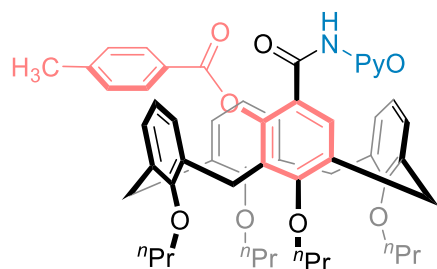

Yield: 73.7 mg (61%), white solid, mp: 122 °C. <sup>1</sup>H NMR (600 MHz, CDCl<sub>3</sub>) δ 10.61 (s, 1H), 8.45 (dd, *J* = 8.5, 1.4 Hz, 1H), 8.19 (d, *J* = 5.9 Hz, 1H), 8.12 (d, *J* = 8.1 Hz, 2H), 7.45 (s, 1H), 7.29 (d, *J* = 8.1 Hz, 2H), 7.23 (dd, *J* = 12.3, 4.7 Hz, 1H), 6.95-6.82 (m, 3H), 6.75 (t, *J* = 7.4 Hz, 1H), 6.58-6.29 (m, 6H), 4.56-4.40 (m, 3H), 4.24 (d, *J* = 13.9 Hz, 1H), 4.07 (dtd, *J* = 18.6, 10.3, 8.1 Hz, 2H), 3.93 (dd, *J* = 8.3, 7.2 Hz, 2H), 3.86-3.67 (m, 4H), 3.38 (d, *J* = 13.9 Hz, 1H), 3.28 (d, *J* = 13.6 Hz, 1H), 3.18 (t, *J* = 12.8 Hz, 2H), 2.43 (s, 3H), 2.01-1.81 (m, 8H), 1.06 (t, *J* = 7.4 Hz, 3H), 1.02-0.93 (m, 9H). <sup>13</sup>C NMR (151 MHz, CDCl<sub>3</sub>) δ 165.1, 164.4, 161.9, 157.2, 155.9, 155.8, 146.5, 144.6, 144.5, 136.9, 136.1, 135.9, 134.6, 134.4, 134.36, 133.0, 132.4, 131.0, 130.8, 129.2, 129.1, 128.6, 128.5, 128.3, 128.28, 127.9, 127.6, 126.2, 122.4, 122.3, 122.1, 121.5, 118.3, 115.0, 77.2, 76.7, 76.6, 31.07, 31.03, 30.7, 25.3, 23.4, 23.2, 23.16, 21.8, 10.6, 10.4, 10.1, 10.0. **HRMS** (ESI): *m/z* [M+H]<sup>+</sup> calcd for [C<sub>53</sub>H<sub>57</sub>N<sub>2</sub>O<sub>8</sub>]<sup>+</sup> requires 863.4271, found 863.4275. [α]<sub>D</sub><sup>25</sup> = +26 (*c* = 0.1, CH<sub>2</sub>Cl<sub>2</sub>). The product was analyzed by HPLC to determine the enantiomeric excess: 98% ee (CHIRALPAK IB-H, hexane/*i*-PrOH = 90/10, detector: 254 nm, T = 25 °C, flow rate: 1 mL/min), *t*<sub>1</sub> (major) = 16.369 min, *t*<sub>2</sub> (minor) = 15.371 min.

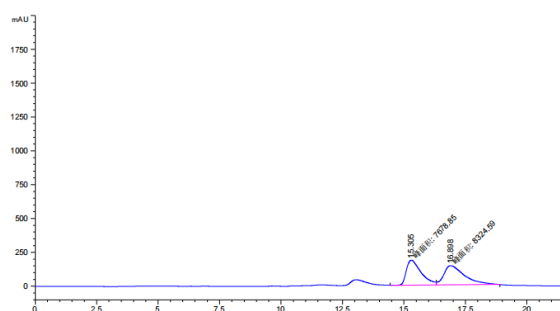

| Peak | RetTime | Area       | Height    | Area    |
|------|---------|------------|-----------|---------|
| 1    | 15.305  | 7678.85352 | 184.89508 | 47.9825 |
| 2    | 16.898  | 8324.58594 | 141.65874 | 52.0175 |

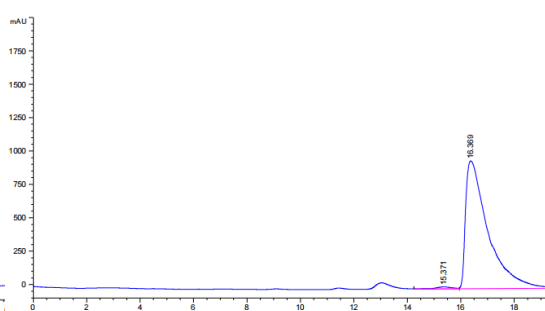

| Peak | RetTime | Area      | Height    | Area    |
|------|---------|-----------|-----------|---------|
| 1    | 15.371  | 655.08588 | 14.85541  | 1.1636  |
| 2    | 16.369  | 55643.4   | 957.31390 | 98.8364 |

**2-(1<sup>2</sup>,3<sup>2</sup>,5<sup>2</sup>,7<sup>2</sup>-tetrapropoxy-1<sup>4</sup>-(4-(trifluoromethyl)benzoyl)oxy)-1,3,5,7(1,3)-  
tetraabenzenacyclooctaphane-1<sup>5</sup>-carboxamido)pyridine 1-oxide (3at)**

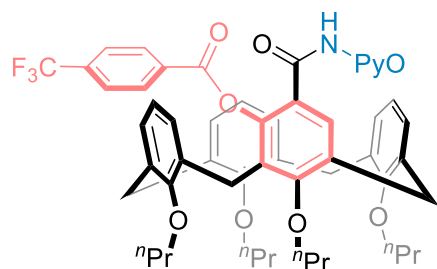

Yield: 66.7 mg (52%). White solid, mp: 126 °C.

<sup>1</sup>H NMR (600 MHz, CDCl<sub>3</sub>) δ 10.48 (s, 1H), 8.38 (dd, *J* = 8.5, 1.6 Hz, 1H), 8.29 (d, *J* = 8.2 Hz, 2H), 8.20 (dd, *J* = 6.5, 0.9 Hz, 1H), 7.75 (d, *J* = 8.3 Hz, 2H), 7.33 (s, 1H), 7.26-7.20 (m, 1H), 6.95-6.89 (m, 1H), 6.78 (dd, *J* = 15.8, 7.1 Hz, 2H), 6.67 (t, *J* = 7.4 Hz, 1H), 6.62-6.47 (m, 4H), 6.44-6.30 (m, 2H), 4.56-4.41 (m, 3H), 4.29 (d, *J* = 14.0 Hz, 1H), 4.13-3.95 (m, 2H), 3.89 (dd, *J* = 16.8, 9.4 Hz, 3H), 3.78 (tt, *J* = 17.5, 8.7 Hz, 3H), 3.33 (d, *J* = 14.0 Hz, 1H), 3.27 (d, *J* = 13.6 Hz, 1H), 3.19 (t, *J* = 13.1 Hz, 2H), 2.23-1.70 (m, 8H), 0.99 (ddt, *J* = 22.4, 9.9, 7.4 Hz, 12H). <sup>13</sup>C NMR (151 MHz, CDCl<sub>3</sub>) δ 164.2, 163.8, 161.6, 156.9, 156.2, 156.1, 146.1, 144.4, 136.9, 135.7, 135.4, 135.1, 135.0, 134.97, 134.8, 134.4, 133.2, 132.4, 132.37, 131.1, 130.6, 128.8, 128.6, 128.57, 128.48, 128.37, 127.9, 127.7, 125.5, 125.48, 124.5, 122.7, 122.5, 122.15, 122.1, 121.2, 118.4, 114.8, 76.6, 76.6, 31.1, 31.0, 30.7, 25.8, 23.4, 23.3, 23.2, 23.0, 10.4, 10.3, 10.2, 10.1. <sup>19</sup>F NMR (565 MHz, CDCl<sub>3</sub>) δ -63.1. HRMS (ESI): *m/z* [M+H]<sup>+</sup> calcd for [C<sub>54</sub>H<sub>56</sub>F<sub>3</sub>N<sub>2</sub>O<sub>8</sub>]<sup>+</sup> requires 917.3989, found 917.3992. [α]<sub>D</sub><sup>25</sup> = +37 (c = 0.1, CH<sub>2</sub>Cl<sub>2</sub>). The product was analyzed by HPLC to determine the enantiomeric excess: 98% ee (CHIRALPAK IB-H, hexane/*i*-PrOH = 90/10, detector: 254 nm, T = 25 °C, flow rate: 1 mL/min), *t*<sub>1</sub> (major) = 13.782 min, *t*<sub>2</sub> (minor) = 11.124 min.

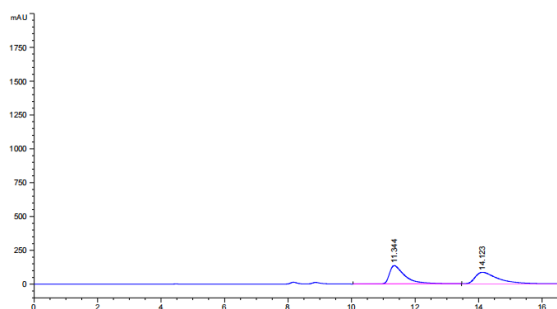

| Peak | RetTime | Area       | Height    | Area    |
|------|---------|------------|-----------|---------|
| 1    | 11.344  | 4534.72559 | 135.12341 | 51.2788 |
| 2    | 14.123  | 4308.55127 | 84.81761  | 48.7212 |

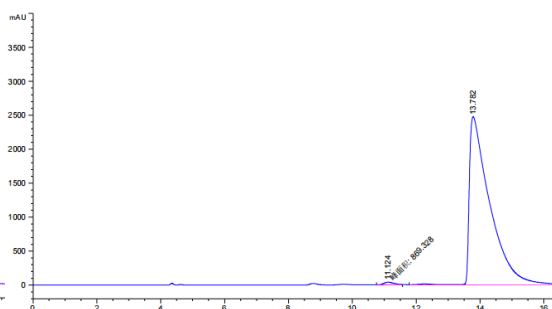

| Peak | RetTime | Area      | Height     | Area    |
|------|---------|-----------|------------|---------|
| 1    | 11.124  | 869.32764 | 39.08958   | 0.7849  |
| 2    | 13.782  | 109889    | 2471.35986 | 99.2151 |

**2-(1<sup>4</sup>-((4-chlorobenzoyl)oxy)-1<sup>2</sup>,3<sup>2</sup>,5<sup>2</sup>,7<sup>2</sup>-tetrapropoxy-1,3,5,7(1,3)-  
tetrabenzenacyclooctaphane-1<sup>5</sup>-carboxamido)pyridine 1-oxide (3au)**

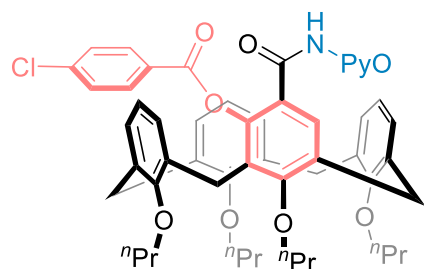

Yield: 69.2 mg (56%). White solid, mp: 126 °C.

<sup>1</sup>H NMR (600 MHz, CDCl<sub>3</sub>) δ 10.52 (s, 1H), 8.41 (d, *J* = 8.4 Hz, 1H), 8.20 (d, *J* = 6.3 Hz, 1H), 8.13 (d, *J* = 8.5 Hz, 2H), 7.46 (d, *J* = 8.5 Hz, 2H), 7.37 (s, 1H), 7.23 (d, *J* = 7.8 Hz, 1H), 6.92 (dd, *J* = 10.1, 3.9 Hz, 1H), 6.80 (s, 2H), 6.69 (t, *J* = 7.3 Hz, 1H), 6.53 (d, *J* = 32.3 Hz, 4H), 6.42 (s, 2H), 4.58-4.40 (m, 3H), 4.28 (d, *J* = 14.0 Hz, 1H), 4.04 (qd, *J* = 17.5, 9.2 Hz, 2H), 3.89 (dt, *J* = 16.9, 7.4 Hz, 3H), 3.77 (tt, *J* = 17.5, 8.7 Hz, 3H), 3.34 (d, *J* = 13.9 Hz, 1H), 3.27 (d, *J* = 13.6 Hz, 1H), 3.19 (dd, *J* = 13.2, 10.9 Hz, 2H), 1.92 (dddd, *J* = 50.9, 28.9, 14.8, 7.4 Hz, 8H), 1.07-0.94 (m, 12H). <sup>13</sup>C NMR (151 MHz, CDCl<sub>3</sub>) δ 164.2, 164.18, 161.7, 157.0, 156.1, 156.0, 146.2, 144.5, 140.2, 136.9, 135.8, 135.6, 134.9, 134.8, 134.4, 133.2, 132.5, 132.2, 130.7, 128.9, 128.8, 128.56, 128.5, 128.4, 127.9, 127.7, 127.5, 122.5, 122.1, 121.3, 118.4, 114.9, 77.2, 76.7, 76.6, 31.1, 31.0, 30.7, 25.6, 23.4, 23.3, 23.2, 23.1, 10.5, 10.3, 10.2, 10.1. HRMS (ESI): *m/z* [M+H]<sup>+</sup> calcd for [C<sub>53</sub>H<sub>56</sub>ClN<sub>2</sub>O<sub>8</sub>]<sup>+</sup> requires 883.3725, found 883.3734. [α]<sub>D</sub><sup>25</sup> = +22 (c = 0.1, CH<sub>2</sub>Cl<sub>2</sub>). The product was analyzed by HPLC to determine the enantiomeric excess: 98% ee (CHIRALPAK IB-H, hexane/*i*-PrOH = 90/10, detector: 254 nm, T = 25 °C, flow rate: 1 mL/min), *t*<sub>1</sub> (major) = 15.915 min, *t*<sub>2</sub> (minor) = 14.198 min.

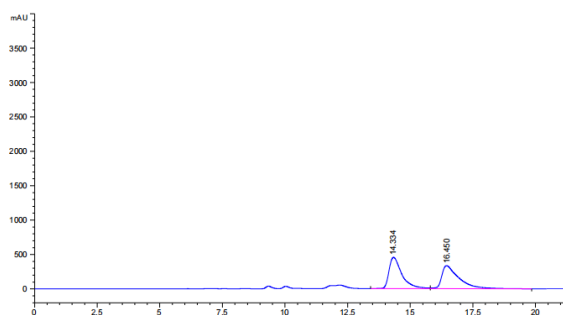

| Peak | RetTime | Area    | Height    | Area    |
|------|---------|---------|-----------|---------|
| 1    | 14.334  | 16424.6 | 455.62845 | 50.6299 |
| 2    | 16.450  | 16016.0 | 334.29611 | 49.3701 |

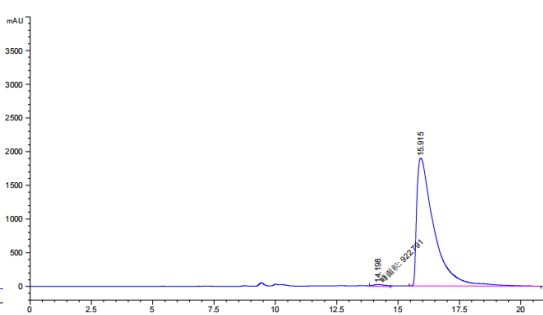

| Peak | RetTime | Area      | Height     | Area    |
|------|---------|-----------|------------|---------|
| 1    | 14.198  | 922.79138 | 27.01377   | 0.9853  |
| 2    | 15.915  | 92730.6   | 1897.02051 | 99.0147 |

**2-(1<sup>4</sup>-((4-(methoxycarbonyl)benzoyl)oxy)-1<sup>2</sup>,3<sup>2</sup>,5<sup>2</sup>,7<sup>2</sup>-tetrapropoxy-1,3,5,7(1,3)-  
tetrabenzenacyclooctaphane-1<sup>5</sup>-carboxamido)pyridine 1-oxide (3av)**

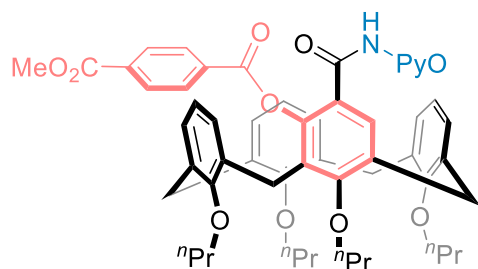

Yield: 77.4 mg (61%). White solid, mp: 128 °C.

<sup>1</sup>H NMR (600 MHz, CDCl<sub>3</sub>) δ 10.49 (s, 1H), 8.39 (dd, *J* = 8.5, 1.3 Hz, 1H), 8.25 (d, *J* = 8.4 Hz, 2H), 8.22-8.17 (m, 1H), 8.15 (d, *J* = 8.5 Hz, 2H), 7.34 (s, 1H), 7.22 (dd, *J* = 12.3, 4.7 Hz, 1H), 6.95-6.87 (m, 1H), 6.79 (dd, *J* = 13.0, 7.2 Hz, 2H), 6.68 (t, *J* = 7.4 Hz, 1H), 6.65-6.44 (m, 4H), 6.44-6.30 (m, 2H), 4.56-4.41 (m, 3H), 4.28 (d, *J* = 14.0 Hz, 1H), 4.03 (dtd, *J* = 18.2, 9.9, 8.2 Hz, 2H), 3.96 (s, 3H), 3.92-3.84 (m, 3H), 3.83-3.72 (m, 3H), 3.35 (d, *J* = 14.0 Hz, 1H), 3.27 (d, *J* = 13.6 Hz, 1H), 3.18 (t, *J* = 13.5 Hz, 2H), 2.00-1.81 (m, 8H), 1.60-0.93 (m, 12H). <sup>13</sup>C NMR (151 MHz, CDCl<sub>3</sub>) δ 166.3, 164.2, 161.7, 156.9, 156.2, 156.1, 146.2, 144.5, 136.9, 135.7, 135.5, 135.0, 134.8, 134.4, 134.3, 133.2, 132.9, 132.4, 130.7, 129.6, 128.8, 128.6, 128.5, 128.48, 128.41, 127.9, 127.7, 122.4, 122.1, 121.2, 118.4, 114.8, 76.6, 52.5, 31.1, 31.0, 30.6, 23.4, 23.3, 23.2, 23.1, 10.5, 10.3, 10.2, 10.1. HRMS (ESI): *m/z* [M+H]<sup>+</sup> calcd for [C<sub>55</sub>H<sub>59</sub>ClN<sub>2</sub>O<sub>10</sub>]<sup>+</sup> requires 907.4169, found 907.4171. [α]<sub>D</sub><sup>25</sup> = +34 (c = 0.1, CH<sub>2</sub>Cl<sub>2</sub>). The product was analyzed by HPLC to determine the enantiomeric excess: 99% ee (CHIRALPAK AD-H, hexane/*i*-PrOH = 95/5, detector: 254 nm, T = 25 °C, flow rate: 1 mL/min), *t*<sub>1</sub> (major) = 28.451 min, *t*<sub>2</sub> (minor) = 37.742 min.

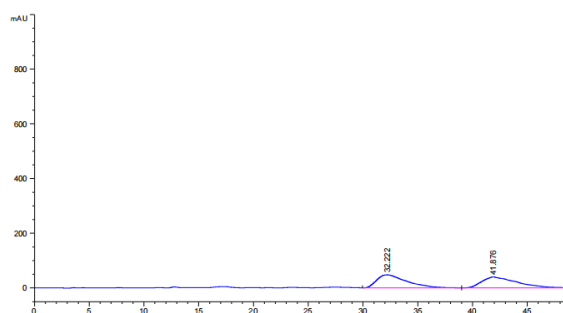

| Peak | RetTime | Area       | Height   | Area    |
|------|---------|------------|----------|---------|
| 1    | 32.222  | 8986.64648 | 47.40490 | 50.2234 |
| 2    | 41.876  | 8906.68164 | 39.96460 | 49.7766 |

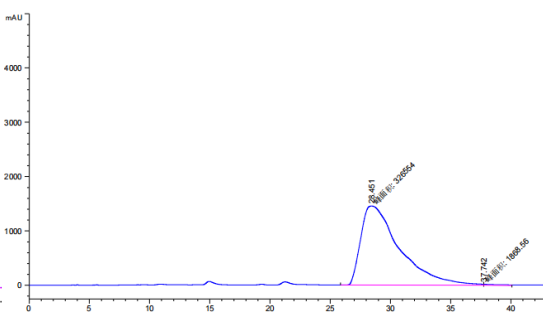

| Peak | RetTime | Area       | Height     | Area    |
|------|---------|------------|------------|---------|
| 1    | 28.451  | 326554     | 1455.48901 | 99.4311 |
| 2    | 37.742  | 1868.55835 | 20.38922   | 0.5689  |

**2-(1<sup>4</sup>-((3-fluorobenzoyl)oxy)-1<sup>2</sup>,3<sup>2</sup>,5<sup>2</sup>,7<sup>2</sup>-tetrapropoxy-1,3,5,7(1,3)-  
tetraabenzenacyclooctaphane-1<sup>5</sup>-carboxamido)pyridine 1-oxide (3aw)**

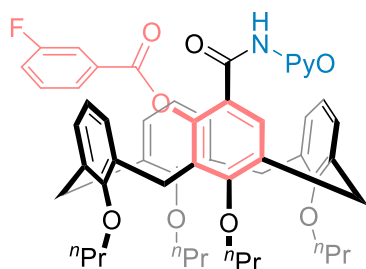

Yield: 69.1 mg (57%). White solid, mp: 122 °C.

**<sup>1</sup>H NMR** (600 MHz, CDCl<sub>3</sub>) δ 10.49 (s, 1H), 8.41 (dd, *J* = 8.5, 1.4 Hz, 1H), 8.24-8.19 (m, 1H), 8.00 (d, *J* = 7.8 Hz, 1H), 7.86 (d, *J* = 9.0 Hz, 1H), 7.47 (td, *J* = 8.0, 5.5 Hz, 1H), 7.34 (s, 1 H), 7.33-7.28 (m, 1H), 7.24 (dd, *J* = 12.4, 4.9 Hz, 1H), 6.97-6.89 (m, 1H), 6.81 (dd, *J* = 13.1, 7.4 Hz, 2H), 6.69 (t, *J* = 7.4 Hz, 1H), 6.52 (dd, *J* = 32.1, 6.9 Hz, 4H), 6.45-6.35 (m, 2H), 4.56-4.41 (m, 3H), 4.27 (d, *J* = 14.0 Hz, 1H), 4.04 (dtd, *J* = 18.4, 10.1, 8.1 Hz, 2H), 3.88 (dt, *J* = 17.0, 7.4 Hz, 3H), 3.82 -3.71 (m, 3H), 3.35 (d, *J* = 14.0 Hz, 1H), 3.27 (d, *J* = 13.6 Hz, 1H), 3.18 (t, *J* = 13.0 Hz, 2H), 2.00-1.89 (m, 6H), 1.87-1.82 (m, 2 H), 1.08-1.01 (m, 3 H), 1.00-0.92 (m, 9H). **<sup>13</sup>C NMR** (151 MHz, CDCl<sub>3</sub>) δ 164.2, 163.9, 163.3, 161.7, 157.0, 156.1, 156.0, 146.2, 144.5, 136.9, 135.8, 135.6, 134.9, 134.8, 134.4, 133.1, 132.4, 131.2, 130.7, 130.10, 130.05, 128.7, 128.5, 128.5, 128.4, 127.9, 127.6, 126.4, 122.4, 122.1, 121.2, 120.7, 120.6, 118.4, 117.6, 117.5, 114.8, 76.7, 76.6, 31.1, 31.0, 30.7, 23.4, 23.3, 23.2, 23.1 10.5, 10.3, 10.2, 10.1. **<sup>19</sup>F NMR** (565 MHz, CDCl<sub>3</sub>) δ -112.1. **HRMS** (ESI): *m/z* [M+H]<sup>+</sup> calcd for [C<sub>53</sub>H<sub>56</sub>FN<sub>2</sub>O<sub>8</sub>]<sup>+</sup> requires 867.4020, found 867.4032. [α]<sub>D</sub><sup>25</sup> = +21 (c = 0.1, CH<sub>2</sub>Cl<sub>2</sub>). The product was analyzed by HPLC to determine the enantiomeric excess: >99% ee (CHIRALPAK IC-H, hexane/*i*-PrOH = 90/10, detector: 254 nm, T = 25 °C, flow rate: 1 mL/min), *t*<sub>1</sub> (major) = 29.033 min, *t*<sub>2</sub> (minor) = 21.345 min.

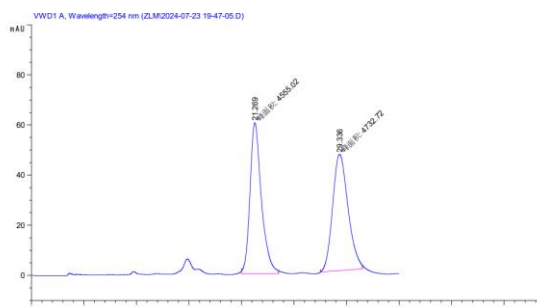

| Peak | RetTime | Area       | Height   | Area    |
|------|---------|------------|----------|---------|
| 1    | 21.269  | 4555.01611 | 60.24934 | 49.0742 |
| 2    | 29.336  | 4726.88574 | 46.57448 | 50.9258 |

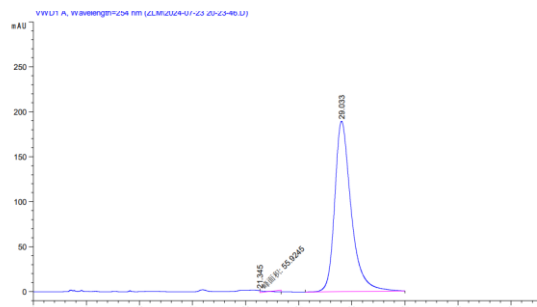

| Peak | RetTime | Area     | Height    | Area    |
|------|---------|----------|-----------|---------|
| 1    | 21.345  | 55.92454 | 2.03804   | 0.2739  |
| 2    | 29.033  | 20365.1  | 189.51302 | 99.7261 |



**2-(1<sup>4</sup>-((2-methylbenzoyl)oxy)-1<sup>2</sup>,3<sup>2</sup>,5<sup>2</sup>,7<sup>2</sup>-tetrapropoxy-1,3,5,7(1,3)-  
tetrabenzenacyclooctaphane-1<sup>5</sup>-carboxamido)pyridine 1-oxide (3ax)**

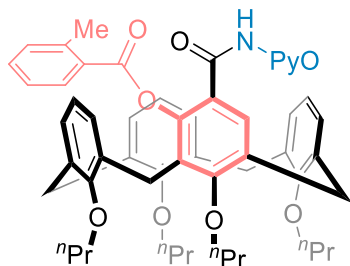

Yield: 82.1 mg (68%). White solid, mp: 122 °C.

<sup>1</sup>H NMR (600 MHz, CDCl<sub>3</sub>) δ 10.55 (s, 1H), 8.46 (dd, *J* = 8.5, 1.5 Hz, 1H), 8.25 (d, *J* = 7.7 Hz, 1H), 8.21 (d, *J* = 6.5 Hz, 1H), 7.50-7.41 (m, 2H), 7.31 (t, *J* = 7.6 Hz, 1H), 7.28-7.24 (m, 2H), 6.97-6.86 (m, 3H), 6.78 (t, *J* = 7.4 Hz, 1H), 6.50-6.44 (m, 1H), 6.41 (d, *J* = 7.3 Hz, 2H), 6.35 (dt, *J* = 20.3, 7.2 Hz, 3H), 4.55-4.40 (m, 3H), 4.23 (d, *J* = 13.9 Hz, 1H), 4.08 (ddd, *J* = 15.6, 10.4, 2.5 Hz, 2H), 3.98-3.90 (m, 2H), 3.82-3.68 (m, 4H), 3.44 (d, *J* = 14.0 Hz, 1H), 3.27 (d, *J* = 13.6 Hz, 1H), 3.17 (dd, *J* = 16.0, 13.7 Hz, 2H), 2.62 (s, 3H), 2.15-1.66 (m, 8H), 1.06 (t, *J* = 7.4 Hz, 3H), 1.02-0.91 (m, 9H). <sup>13</sup>C NMR (151 MHz, CDCl<sub>3</sub>) δ 165.3, 164.5, 162.0, 157.3, 155.7, 146.6, 144.6, 141.7, 136.9, 136.2, 136.1, 134.4, 134.2, 132.8, 132.7, 132.3, 131.9, 131.7, 128.64, 128.61, 128.59, 128.3, 128.2, 128.1, 127.8, 127.7, 125.9, 122.4, 122.3, 122.0, 121.5, 118.3, 114.8, 77.1, 76.7, 76.6, 31.02, 30.97, 30.7, 23.4, 23.2, 23.1, 22.0, 10.6, 10.5, 10.1, 10.0.

**HRMS (ESI):** *m/z* [M+H]<sup>+</sup> calcd for [C<sub>54</sub>H<sub>59</sub>N<sub>2</sub>O<sub>8</sub>]<sup>+</sup> requires 863.4271, found 863.4278 [ $\alpha$ ]<sub>D</sub><sup>25</sup> = +22 (*c* = 0.1, CH<sub>2</sub>Cl<sub>2</sub>). The product was analyzed by HPLC to determine the enantiomeric excess: 96% ee (CHIRALPAK IC-H, hexane/*i*-PrOH = 90/10, detector: 254 nm, T = 25 °C, flow rate: 1 mL/min), *t*<sub>1</sub> (major) = 30.313 min, *t*<sub>2</sub> (minor) = 22.601 min.

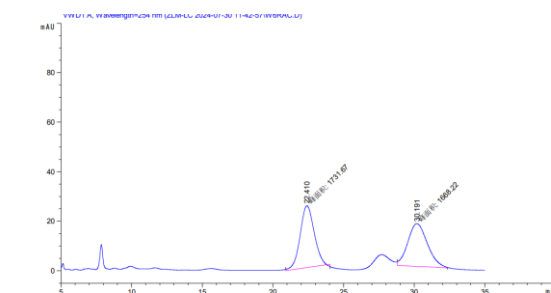

| Peak | RetTime | Area       | Height   | Area    |
|------|---------|------------|----------|---------|
| 1    | 22.410  | 1731.66602 | 25.00605 | 50.9331 |
| 2    | 30.191  | 1668.21912 | 17.30567 | 49.0669 |

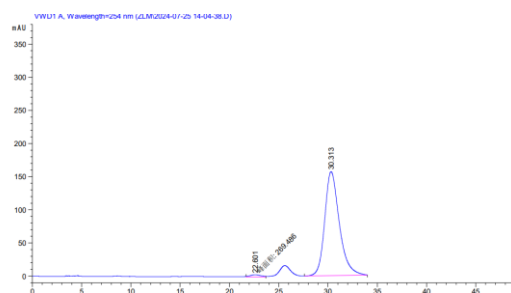

| Peak | RetTime | Area      | Height    | Area    |
|------|---------|-----------|-----------|---------|
| 1    | 22.601  | 269.48618 | 3.41499   | 1.6424  |
| 2    | 30.313  | 16138.4   | 156.92009 | 98.3576 |

**2-(1<sup>4</sup>-((3,5-dimethoxybenzoyl)oxy)-1<sup>2</sup>,3<sup>2</sup>,5<sup>2</sup>,7<sup>2</sup>-tetrapropoxy-1,3,5,7(1,3)-  
tetrabenzenacyclooctaphane-1<sup>5</sup>-carboxamido)pyridine 1-oxide (3ay)**

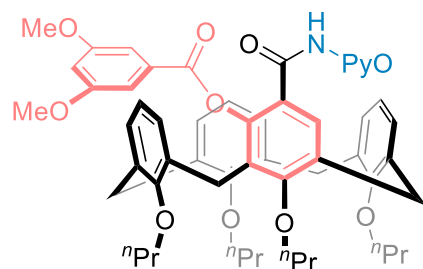

Yield: 76.3 mg (60%). White solid, mp: 129 °C.

<sup>1</sup>H NMR (600 MHz, CDCl<sub>3</sub>) δ 10.52 (s, 1H), 8.43 (dd, *J* = 8.5, 1.5 Hz, 1H), 8.23-8.17 (m, 1H), 7.36 (t, *J* = 7.3 Hz, 3H), 7.26-7.22 (m, 1H), 6.96-6.89 (m, 1H), 6.83 (d, *J* = 7.3 Hz, 2H), 6.77-6.67 (m, 2H), 6.57-6.49 (m, 3H), 6.48-6.39 (m, 3H), 4.55-4.41 (m, 3H), 4.26 (d, *J* = 14.0 Hz, 1H), 4.05 (ddd, *J* = 18.5, 10.5, 5.1 Hz, 2H), 3.94-3.89 (m, 2H), 3.86 (s, 6H), 3.83-3.70 (m, 4H), 3.36 (d, *J* = 14.0 Hz, 1H), 3.27 (d, *J* = 13.6 Hz, 1H), 3.23-3.13 (m, 2H), 2.03-1.79 (m, 8H), 1.05 (t, *J* = 7.4 Hz, 3H), 1.01-0.93 (m, 9H). <sup>13</sup>C NMR (151 MHz, CDCl<sub>3</sub>) δ 164.8, 164.3, 161.7, 160.6, 157.0, 156.0, 155.9, 146.3, 144.5, 136.9, 135.9, 135.6, 134.7, 134.5, 134.3, 133.1, 132.4, 130.9, 130.7, 128.8, 128.5, 128.39, 128.35, 128.3, 127.9, 127.6, 122.4, 122.2, 122.1, 121.5, 118.3, 114.9, 108.0, 107.0, 77.1, 76.6, 76.6, 55.6, 31.1, 31.0, 30.7, 23.4, 23.2, 23.19, 23.11, 10.5, 10.4, 10.2, 10.1. HRMS (ESI): *m/z* [M+H]<sup>+</sup> calcd for [C<sub>55</sub>H<sub>61</sub>N<sub>2</sub>O<sub>10</sub>]<sup>+</sup> requires 909.4326, found 909.4330. [α]<sub>D</sub><sup>25</sup> = +34 (c = 0.1, CH<sub>2</sub>Cl<sub>2</sub>). The product was analyzed by HPLC to determine the enantiomeric excess: 94% ee (CHIRALPAK AS-H, hexane/*i*-PrOH = 95/5, detector: 254 nm, T = 25 °C, flow rate: 1 mL/min), *t*<sub>1</sub> (major) = 16.500 min, *t*<sub>2</sub> (minor) = 27.006 min.

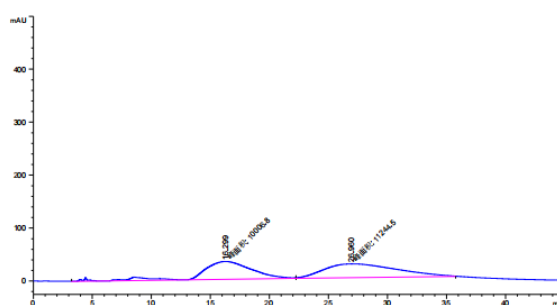

| Peak | RetTime | Area    | Height   | Area    |
|------|---------|---------|----------|---------|
| 1    | 16.299  | 10006.8 | 33.81359 | 47.0880 |
| 2    | 26.960  | 11244.5 | 26.27214 | 52.9120 |

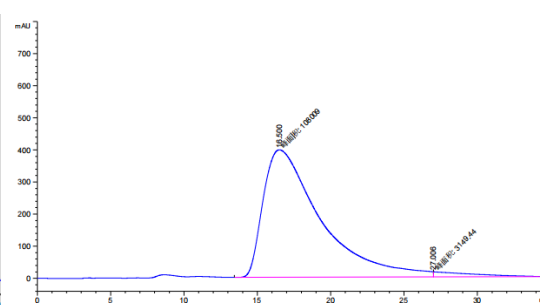

| Peak | RetTime | Area       | Height    | Area    |
|------|---------|------------|-----------|---------|
| 1    | 16.500  | 108009     | 397.15347 | 97.1667 |
| 2    | 27.006  | 3149.44019 | 16.17056  | 2.8333  |

**2-(1<sup>4</sup>-((2-naphthoyl)oxy)-1<sup>2</sup>,3<sup>2</sup>,5<sup>2</sup>,7<sup>2</sup>-tetrapropoxy-1,3,5,7(1,3)-  
tetrabenzenacyclooctaphane-1<sup>5</sup>-carboxamido)pyridine 1-oxide (3az)**

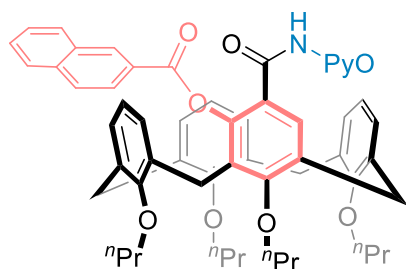

Yield: 78.0 mg (62%). White solid, mp: 167 °C.

<sup>1</sup>H NMR (600 MHz, CDCl<sub>3</sub>) δ 10.59 (s, 1H), 8.84 (s, 1H), 8.40 (d, *J* = 8.3 Hz, 1H), 8.19 (d, *J* = 8.6 Hz, 1H), 8.15 (d, *J* = 6.3 Hz, 1H), 8.05 (d, *J* = 8.1 Hz, 1H), 7.91 (dd, *J* = 16.3, 8.4 Hz, 2H), 7.62 (t, *J* = 7.4 Hz, 1H), 7.56 (t, *J* = 7.4 Hz, 1H), 7.39 (s, 1H), 7.18 (t, *J* = 8.0 Hz, 1H), 6.92-6.76 (m, 3H), 6.71 (t, *J* = 7.4 Hz, 1H), 6.63-6.47 (m, 5H), 6.42 (t, *J* = 7.3 Hz, 1H), 4.59-4.42 (m, 3H), 4.30 (d, *J* = 14.0 Hz, 1H), 4.07 (dtd, *J* = 18.0, 10.0, 8.0 Hz, 2H), 3.90 (dt, *J* = 16.8, 7.4 Hz, 3H), 3.85-3.70 (m, 3H), 3.43 (d, *J* = 14.0 Hz, 1H), 3.29 (d, *J* = 13.5 Hz, 1H), 3.20 (dd, *J* = 13.5, 9.2 Hz, 2H), 2.05-1.81 (m, 8H), 1.05 (t, *J* = 7.4 Hz, 3H), 1.03-0.92 (m, 9H). <sup>13</sup>C NMR (151 MHz, CDCl<sub>3</sub>) δ 165.1, 164.4, 161.7, 157.0, 156.1, 156.07, 146.4, 144.5, 136.9, 135.9, 135.87, 135.6, 134.9, 134.7, 134.3, 133.3, 132.9, 132.6, 132.5, 130.9, 129.8, 129.0, 128.6, 128.5, 128.48, 128.43, 128.2, 128.0, 127.7, 127.6, 126.6, 126.1, 125.9, 122.5, 122.2, 122.1, 121.6, 118.3, 114.9, 77.2, 76.7, 76.6, 31.1, 31.0, 30.7, 23.4, 23.3, 23.2, 23.1, 10.5, 10.3, 10.2, 10.1.

**HRMS** (ESI): *m/z* [M+H]<sup>+</sup> calcd for [C<sub>57</sub>H<sub>59</sub>N<sub>2</sub>O<sub>8</sub>]<sup>+</sup> requires 899.4271, found 899.4271. [α]<sub>D</sub><sup>25</sup> = 113 (c = 0.1, CH<sub>2</sub>Cl<sub>2</sub>). The product was analyzed by HPLC to determine the enantiomeric excess: 99% ee (CHIRALPAK IB-H, hexane/*i*-PrOH = 90/10, detector: 254 nm, T = 25 °C, flow rate: 1 mL/min), *t*<sub>1</sub> (major) = 23.509 min, *t*<sub>2</sub> (minor) = 12.187 min.

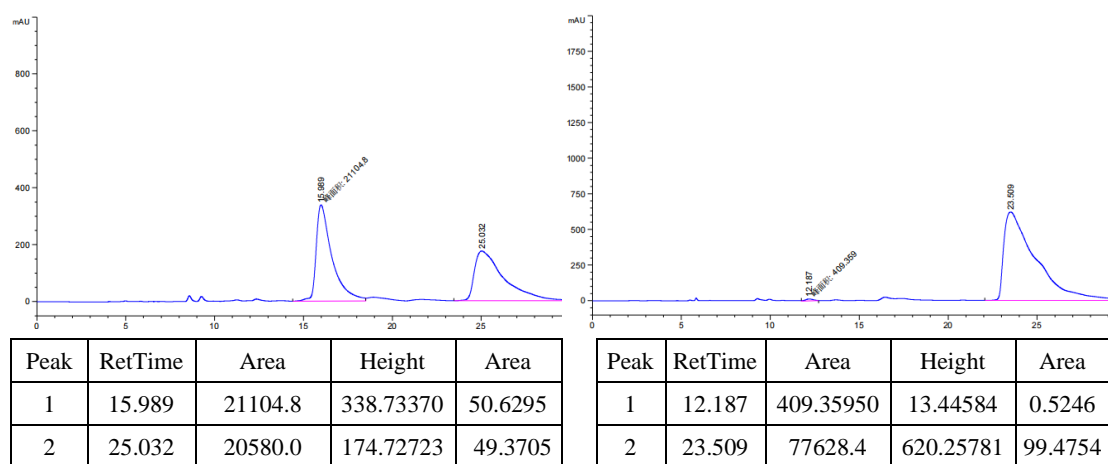

**2-(1<sup>2</sup>,3<sup>2</sup>,5<sup>2</sup>,7<sup>2</sup>-tetraethoxy-1<sup>4</sup>-(pivaloyloxy)-1,3,5,7(1,3)-tetrabenzenacyclooctaphane-1<sup>5</sup>-carboxamido)pyridine 1-oxide (3ba)**

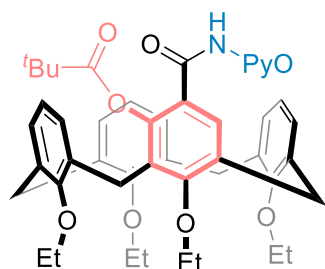

Yield: 60.2 mg (78%). White solid, mp: 112 °C.

<sup>1</sup>H NMR (600 MHz, CDCl<sub>3</sub>) δ 10.54 (s, 1H), 8.58 (dd, *J* = 8.4, 1.3 Hz, 1H), 8.29 (d, *J* = 6.3 Hz, 1H), 7.58 (s, 1H), 7.38 (t, *J* = 7.8 Hz, 1H), 7.17-7.09 (m, 2H), 7.06-6.98 (m, 1H), 6.93 (t, *J* = 7.4 Hz, 1H), 6.30 (dt, *J* = 22.0, 7.5 Hz, 3H), 6.26-6.15 (m, 3H), 4.51-4.39 (m, 3H), 4.31 (tdd, *J* = 11.0, 7.1, 3.9 Hz, 2H), 4.17 (dt, *J* = 20.4, 10.3 Hz, 3H), 3.85-3.74 (m, 4H), 3.39 (d, *J* = 13.7 Hz, 1H), 3.24 (d, *J* = 13.5 Hz, 1H), 3.15 (dd, *J* = 13.2, 3.9 Hz, 2H), 1.51-1.43 (m, 12H), 1.37 (s, 9H). <sup>13</sup>C NMR (151 MHz, CDCl<sub>3</sub>) δ 176.9, 164.8, 161.9, 157.4, 154.9, 154.8, 146.4, 144.7, 137.2, 137.19, 137.12, 135.3, 133.5, 133.47, 132.1, 132.06, 131.9, 128.9, 128.8, 128.2, 128.1, 127.9, 127.8, 127.5, 127.3, 122.7, 122.4, 122.1, 121.9, 118.5, 114.9, 70.6, 70.57, 70.53, 69.8, 39.3, 31.0, 30.8, 27.2, 23.6, 15.72, 15.70 15.65. HRMS (ESI): *m/z* [M+H]<sup>+</sup>calcd for [C<sub>47</sub>H<sub>53</sub>N<sub>2</sub>O<sub>8</sub>]<sup>+</sup> requires 773.3802 found 773.3807. [α]<sub>D</sub><sup>25</sup> = +40 (c = 0.1, CH<sub>2</sub>Cl<sub>2</sub>). The product was analyzed by HPLC to determine the enantiomeric excess: 98% ee (CHIRALPAK IB-H, hexane/*i*-PrOH = 95/5, detector: 254 nm, T = 25 °C, flow rate: 1 mL/min), *t*<sub>1</sub> (major) = 26.642 min, *t*<sub>2</sub> (minor) = 21.624 min.

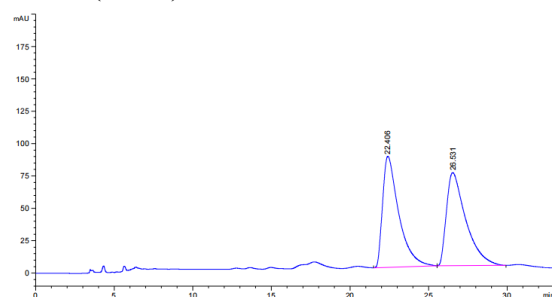

| Peak | RetTime | Area       | Height   | Area    |
|------|---------|------------|----------|---------|
| 1    | 22.406  | 6136.39697 | 85.81712 | 49.9065 |
| 2    | 26.531  | 6159.38037 | 71.86004 | 50.0935 |

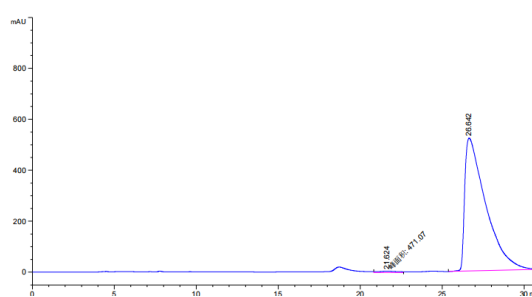

| Peak | RetTime | Area      | Height    | Area    |
|------|---------|-----------|-----------|---------|
| 1    | 21.624  | 471.07001 | 5.58379   | 1.0060  |
| 2    | 26.642  | 46355.5   | 521.71954 | 98.9940 |

**2-(1<sup>2,3,5,7</sup>-tetrabutoxy-1<sup>4</sup>-(pivaloyloxy)-1,3,5,7(1,3)-tetrabenzenacyclooctaphane-1<sup>5</sup>-carboxamido)pyridine 1-oxide (3ca)**

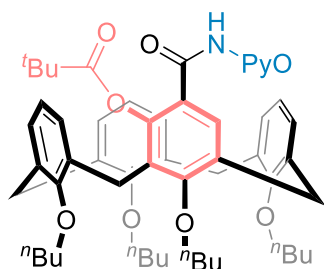

Yield: 83.1 mg (94%). White solid, mp: 122 °C.

<sup>1</sup>H NMR (600 MHz, CDCl<sub>3</sub>) δ 10.53 (s, 1H), 8.61-8.55 (m, 1H), 8.29 (d, *J* = 6.4 Hz, 1H), 7.57 (s, 1H), 7.38 (t, *J* = 8.0 Hz, 1H), 7.12 (dd, *J* = 7.4, 2.4 Hz, 2H), 7.05-6.97 (m, 1H), 6.93 (t, *J* = 7.4 Hz, 1H), 6.27 (ddd, *J* = 29.8, 14.9, 7.4 Hz, 3H), 6.19-6.09 (m, 3H), 4.51-4.39 (m, 3H), 4.26-4.11 (m, 3H), 4.06 (dd, *J* = 10.2, 6.3 Hz, 2H), 3.71 (dt, *J* = 9.6, 6.5 Hz, 4H), 3.40 (d, *J* = 13.9 Hz, 1H), 3.25 (d, *J* = 13.7 Hz, 1H), 3.16 (dd, *J* = 13.4, 5.0 Hz, 2H), 1.95 (dd, *J* = 16.1, 7.9 Hz, 4H), 1.85 (dd, *J* = 14.6, 6.7 Hz, 4H), 1.60 (ddd, *J* = 15.2, 11.0, 7.6 Hz, 4H), 1.35 (d, *J* = 19.0 Hz, 9H), 1.31 (ddd, *J* = 15.5, 10.1, 7.7 Hz, 4H), 1.05-0.94 (m, 12H). <sup>13</sup>C NMR (151 MHz, CDCl<sub>3</sub>) δ 176.9, 164.8, 162.3, 157.8, 155.2, 155.1, 146.5, 144.7, 137.1, 137.0, 136.9, 134.9, 133.4, 133.3, 131.9, 131.8, 129.0, 128.9, 128.3, 128.0, 127.9, 127.8, 127.4, 127.2, 122.7, 122.4, 121.9, 121.7, 118.5, 114.9, 75.3, 75.1, 75.0, 74.8, 39.3, 32.6, 32.5, 32.1, 32.0, 30.9, 30.7, 27.2, 23.4, 19.7, 19.6, 19.1, 18.9, 14.2, 14.1, 14.0. HRMS (ESI): *m/z* [M+H]<sup>+</sup> calcd for [C<sub>55</sub>H<sub>69</sub>N<sub>2</sub>O<sub>8</sub>]<sup>+</sup> requires 885.5054 found 885.5064. [α]<sub>D</sub><sup>25</sup> = +28 (c = 0.1, CH<sub>2</sub>Cl<sub>2</sub>). The product was analyzed by HPLC to determine the enantiomeric excess: 98% ee (CHIRALPAK IB-H, hexane/*i*-PrOH = 96/4, detector: 254 nm, T = 25 °C, flow rate: 0.5 mL/min), *t*<sub>1</sub> (major) = 40.779 min, *t*<sub>2</sub> (minor) = 39.329 min.

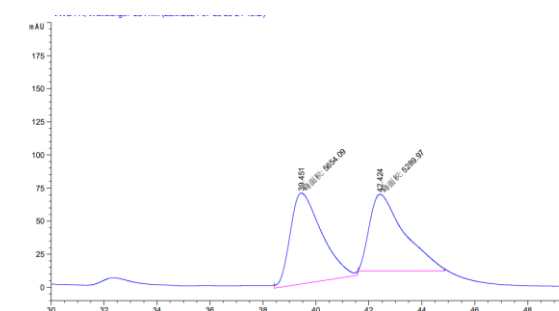

| Peak | RetTime | Area       | Height   | Area    |
|------|---------|------------|----------|---------|
| 1    | 39.451  | 5654.09082 | 68.64409 | 51.6636 |
| 2    | 42.424  | 5289.96924 | 57.83927 | 48.3364 |

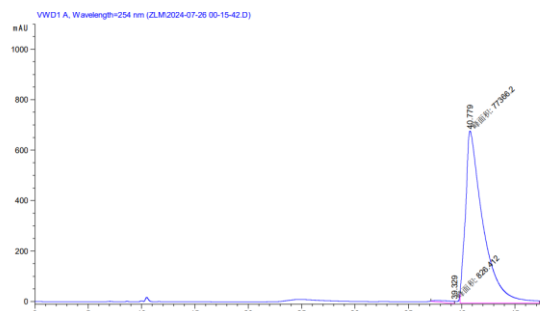

| Peak | RetTime | Area      | Height    | Area    |
|------|---------|-----------|-----------|---------|
| 1    | 39.329  | 826.41180 | 9.16060   | 1.0569  |
| 2    | 40.779  | 77366.2   | 681.06677 | 98.9431 |

**2-(1<sup>2</sup>,3<sup>2</sup>,5<sup>2</sup>,7<sup>2</sup>-tetrabutoxy-1<sup>4</sup>-hydroxy-1,3,5,7(1,3)-tetrabenzenacyclooctaphane-1<sup>5</sup>-carboxamido)pyridine 1-oxide (4)**

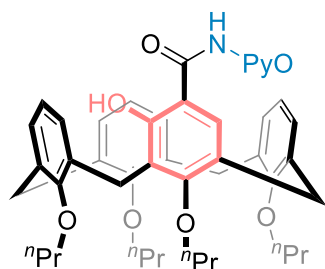

Yield: 70.0 mg (94%). White solid, mp: 145 °C.

<sup>1</sup>H NMR (600 MHz, CDCl<sub>3</sub>) δ 11.94 (s, 1H), 10.97 (s, 1H), 8.56 (s, 1H), 8.32 (s, 1H), 7.50-7.30 (m, 2H), 7.19-6.95 (m, 3H), 6.80 (t, *J* = 7.4 Hz, 1H), 6.41 (d, *J* = 7.1 Hz, 1H), 6.33 (dt, *J* = 13.4, 6.7 Hz, 2H), 6.24 (t, *J* = 6.8 Hz, 3H), 4.50-4.38 (m, 3H), 4.21-3.87 (m, 6H), 3.87-3.60 (m, 4H), 3.18 (dd, *J* = 28.3, 13.5 Hz, 3H), 2.04-1.93 (m, 4H), 1.92-1.83 (m, 4H), 1.08 (dt, *J* = 12.3, 7.4 Hz, 6H), 0.93 (dt, *J* = 14.8, 7.5 Hz, 6H). <sup>13</sup>C NMR (151 MHz, CDCl<sub>3</sub>) δ 169.2, 164.7, 160.7, 157.6, 155.5, 155.4, 136.7, 136.5, 133.9, 133.4, 133.2, 132.7, 128.75, 128.72, 128.5, 127.9, 127.64, 127.61, 127.4, 126.2, 125.6, 122.25, 122.20, 121.8, 107.9, 76.9, 76.5, 31.0, 30.9, 30.6, 23.5, 23.4, 23.3, 23.0, 22.5, 10.73, 10.71, 10.0, 9.9. HRMS (ESI): *m/z* [M+H]<sup>+</sup> calcd for [C<sub>46</sub>H<sub>53</sub>N<sub>2</sub>O<sub>7</sub>]<sup>+</sup> requires 745.3863 found 745.3863. [α]<sub>D</sub><sup>25</sup> = +26 (c = 0.1, CH<sub>2</sub>Cl<sub>2</sub>). The product was analyzed by HPLC to determine the enantiomeric excess: >99% ee (CHIRALPAK IB-H, hexane/*i*-PrOH = 95/5, detector: 254 nm, T = 25 °C, flow rate: 1 mL/min), *t*<sub>1</sub> (major) = 21.407 min, *t*<sub>2</sub> (minor) = 26.790 min.

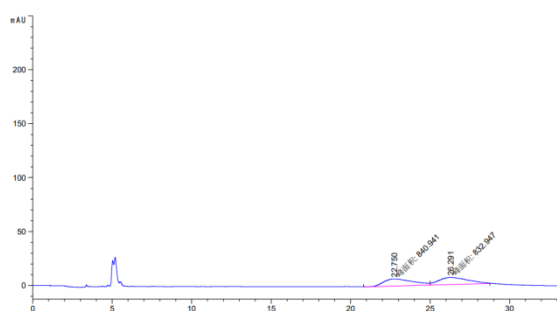

| Peak | RetTime | Area      | Height  | Area    |
|------|---------|-----------|---------|---------|
| 1    | 22.750  | 840.94098 | 6.48589 | 50.2388 |
| 2    | 26.291  | 832.94678 | 6.51230 | 49.7612 |

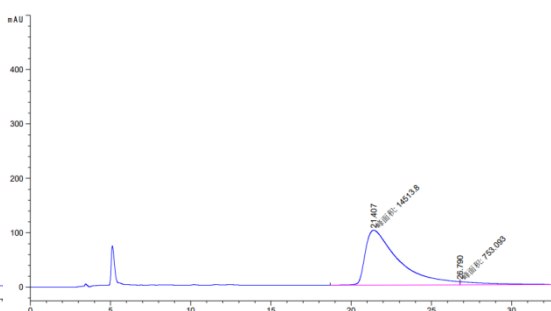

| Peak | RetTime | Area      | Height    | Area    |
|------|---------|-----------|-----------|---------|
| 1    | 21.407  | 14513.8   | 100.68847 | 95.0671 |
| 2    | 26.790  | 753.09338 | 5.70805   | 4.9329  |

**2-(1<sup>5</sup>-oxo-1<sup>8</sup>,3<sup>2</sup>,5<sup>2</sup>,7<sup>2</sup>-tetrapropoxy-1<sup>2</sup>,1<sup>3</sup>,1<sup>4</sup>,1<sup>5</sup>-tetrahydro-1(7,9)-benzo[f][1,4]oxazepina-3,5,7(1,3)-tribenzenacyclooctaphane-1<sup>4</sup>-yl)pyridine 1-oxide (6)**

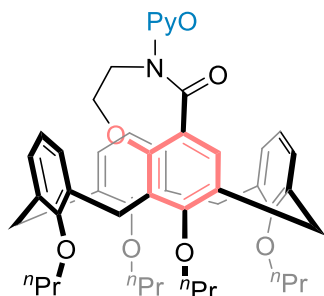

Yield: 65.5 mg (85%). White solid, mp: 136 °C. <sup>1</sup>H NMR (600 MHz, CDCl<sub>3</sub>) δ 8.25 (d, *J* = 6.5 Hz, 1H), 7.48 (dd, *J* = 8.1, 1.6 Hz, 1H), 7.29 (dd, *J* = 11.3, 4.4 Hz, 1H), 7.21 – 7.15 (m, 1H), 7.01 (s, 1H), 6.90 – 6.78 (m, 3H), 6.78 – 6.69 (m, 2H), 6.63 (m, 3H), 6.45 (d, *J* = 6.4 Hz, 1H), 4.49 (d, *J* = 13.3 Hz, 2H), 4.42 (d, *J* = 13.2 Hz, 1H), 4.26 (d, *J* = 13.4 Hz, 1H), 4.10 – 3.88 (m, 5H), 3.87 – 3.71 (m, 4H), 3.66 (d, *J* = 16.1 Hz, 1H), 3.54 (d, *J* = 13.4 Hz, 1H), 3.45 – 3.32 (m, 1H), 3.20 (m, 3H), 3.07 (s, 1H), 1.97 – 1.88 (m, 8H), 1.03 (m, 6H), 0.95 (m, 6H). <sup>13</sup>C NMR (151 MHz, CDCl<sub>3</sub>) δ 170.2, 161.0, 157.1, 156.7, 156.3, 150.6, 145.7, 140.4, 136.1, 135.4, 134.9, 134.8, 134.7, 134.5, 131.0, 129.9, 129.6, 128.7, 128.41, 128.35, 128.3, 127.9, 127.5, 126.9, 126.0, 123.8, 122.6, 122.4, 122.0, 121.9, 77.2, 76.9, 76.3, 71.8, 45.3, 31.4, 31.0, 30.6, 23.3, 23.3, 23.2, 22.6, 10.5, 10.4, 10.2, 10.0. HRMS (ESI): *m/z* [M+H]<sup>+</sup>calcd for [C<sub>48</sub>H<sub>55</sub>N<sub>2</sub>O<sub>7</sub>]<sup>+</sup> requires 771.4004 found 771.4012. [α]<sub>D</sub><sup>25</sup> = +42 (c = 0.1, CH<sub>2</sub>Cl<sub>2</sub>). The product was analyzed by HPLC to determine the enantiomeric excess: 99% ee (CHIRALPAK AD-H, hexane/*i*-PrOH = 90/10, detector: 254 nm, T = 25 °C, flow rate: 1 mL/min), t<sub>1</sub> (major) = 10.447 min, t<sub>2</sub> (minor) = 7.427 min.

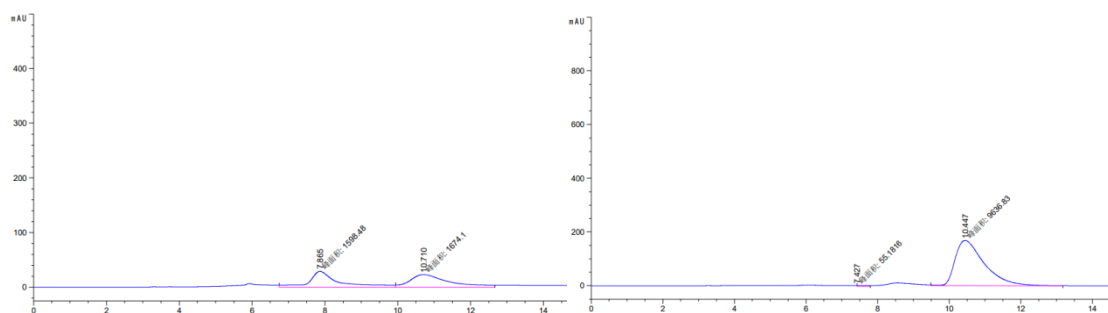

| Peak | RetTime | Area       | Height   | Area    |
|------|---------|------------|----------|---------|
| 1    | 7.865   | 1598.48083 | 28.66329 | 48.8446 |
| 2    | 10.710  | 1674.10315 | 22.89644 | 51.1554 |

| Peak | RetTime | Area       | Height    | Area    |
|------|---------|------------|-----------|---------|
| 1    | 7.427   | 55.18159   | 2.72039   | 0.5694  |
| 2    | 10.447  | 9636.82617 | 168.70889 | 99.4306 |

## 8. Copies of NMR spectra of the acyloxylated inherently chiral calix[4]arenes

$^1\text{H}$  NMR (600 MHz,  $\text{CDCl}_3$ ), **3aa**

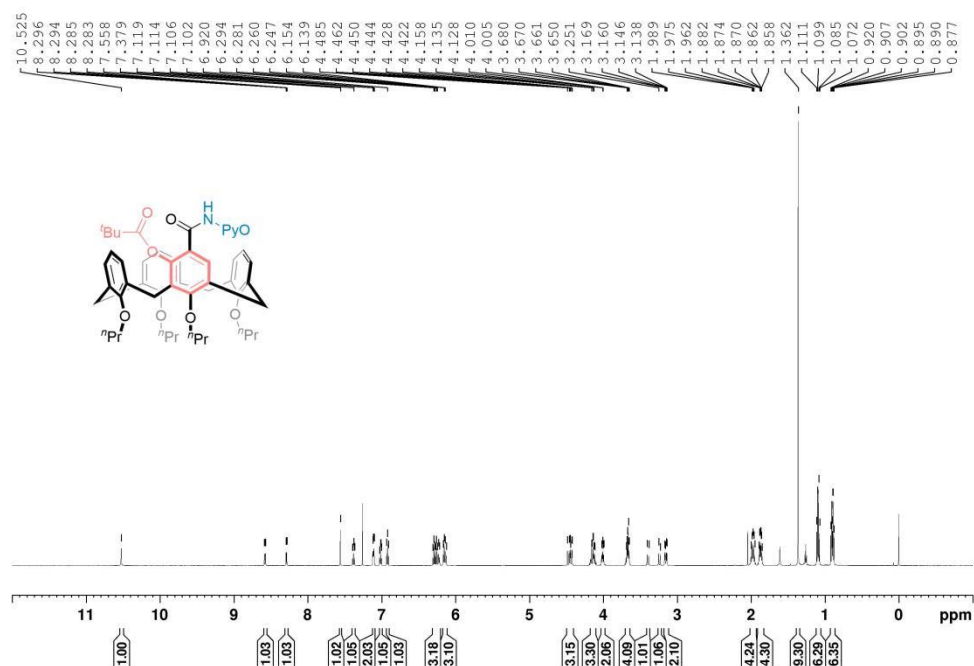

$^{13}\text{C}$  NMR (151 MHz,  $\text{CDCl}_3$ ), **3aa**

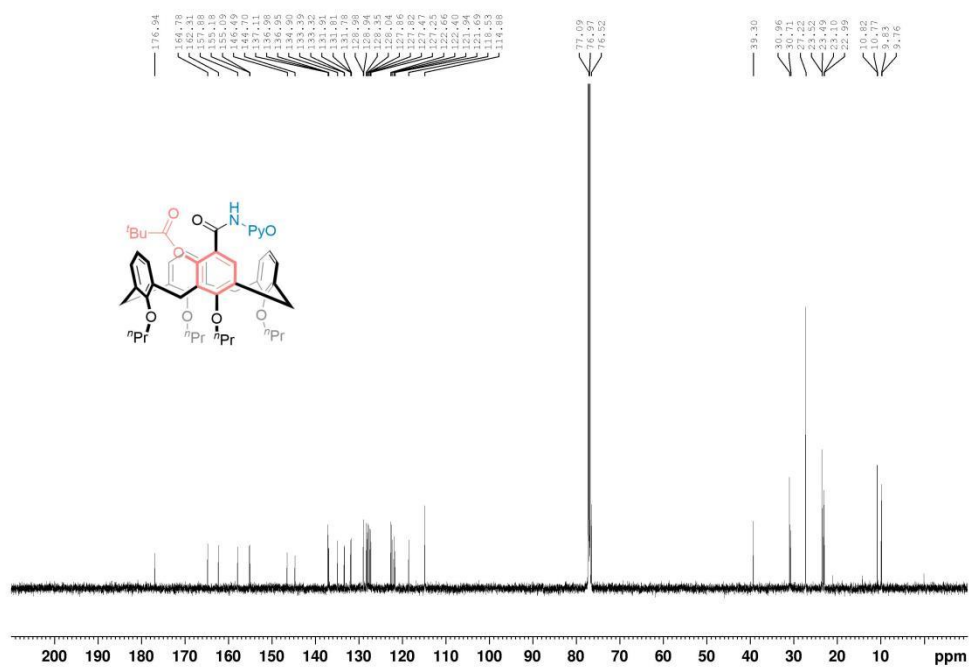



$^1\text{H}$  NMR (600 MHz,  $\text{CDCl}_3$ ), **3ab**

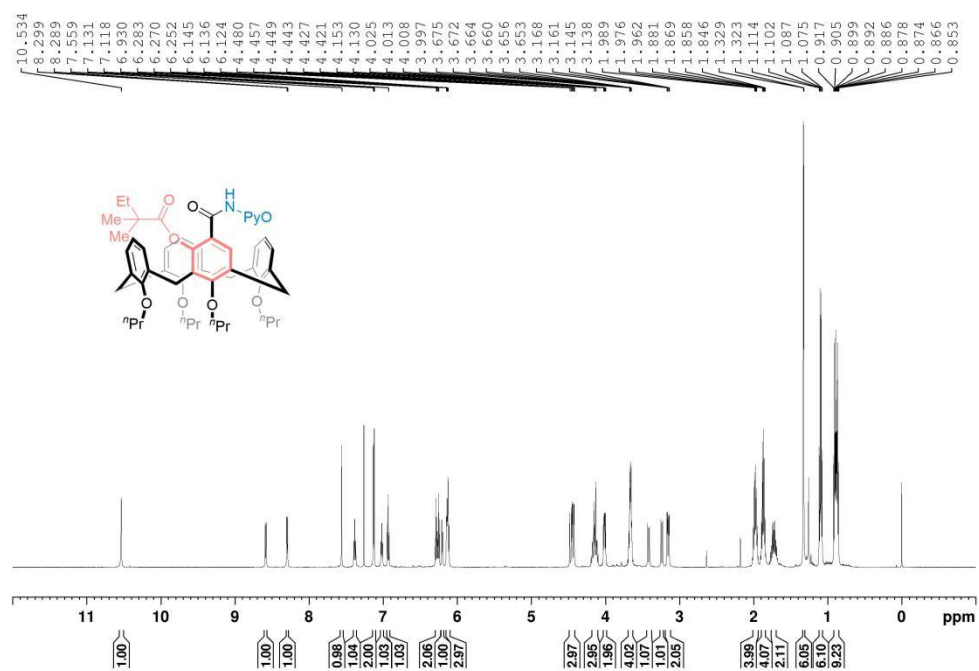

$^{13}\text{C}$  NMR (151 MHz,  $\text{CDCl}_3$ ), **3ab**

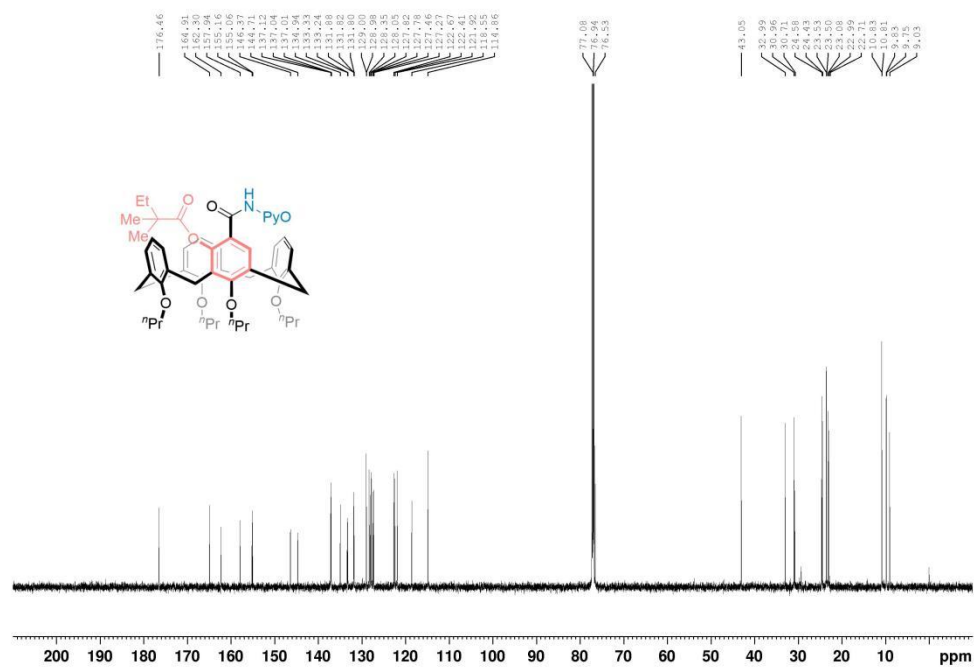



$^1\text{H}$  NMR (600 MHz,  $\text{CDCl}_3$ ), **3ad**

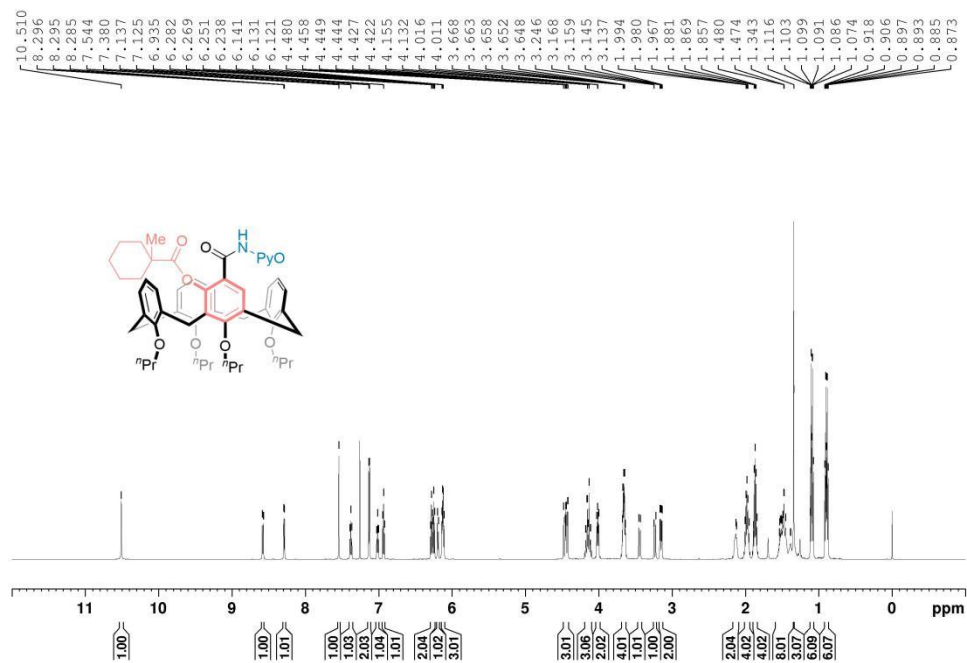

$^{13}\text{C}$  NMR (151 MHz,  $\text{CDCl}_3$ ), **3ad**

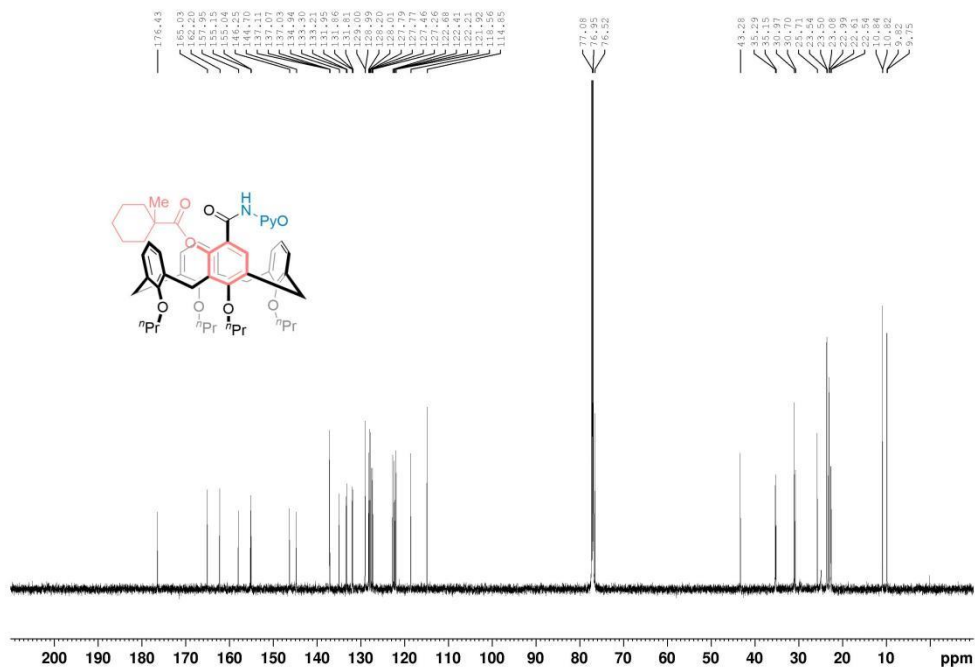

$^1\text{H}$  NMR (600 MHz,  $\text{CDCl}_3$ ), **3ae**

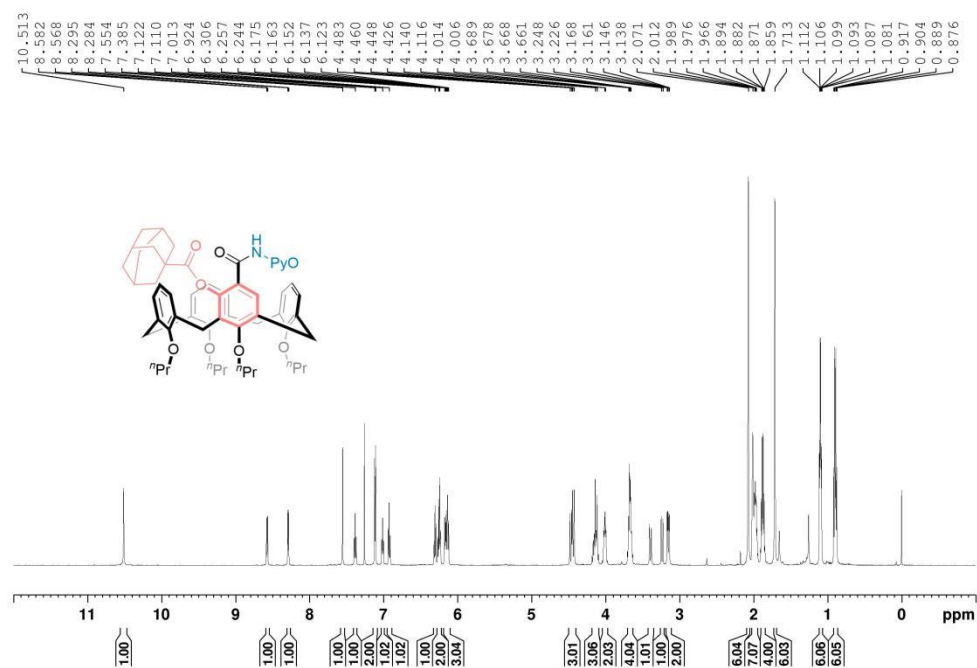

$^{13}\text{C}$  NMR (151 MHz,  $\text{CDCl}_3$ ), **3ae**

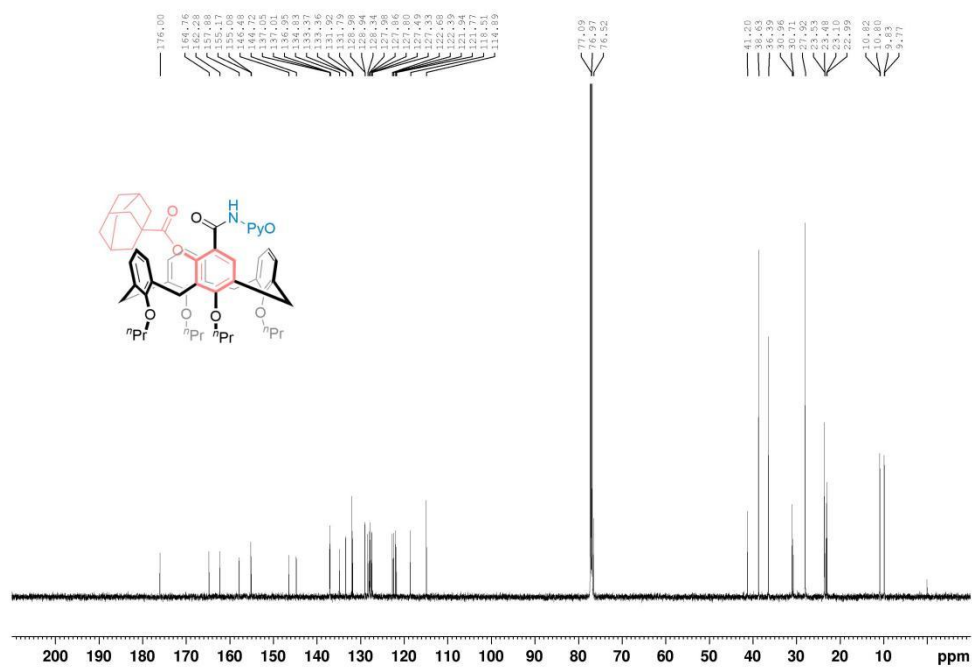

$^1\text{H}$  NMR (600 MHz,  $\text{CDCl}_3$ ), **3af**

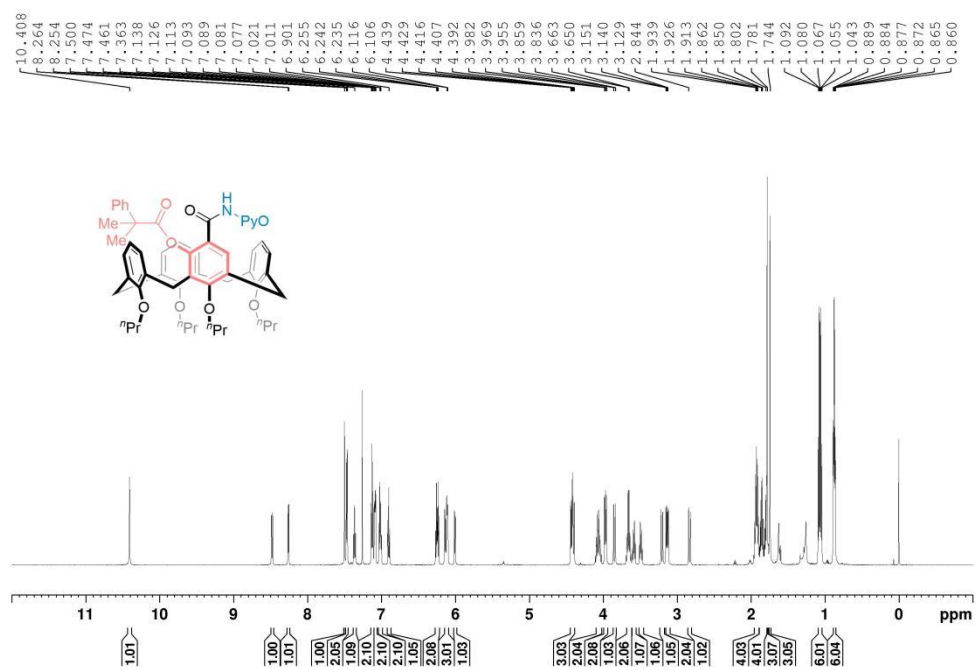

$^{13}\text{C}$  NMR (151 MHz,  $\text{CDCl}_3$ ), **3af**

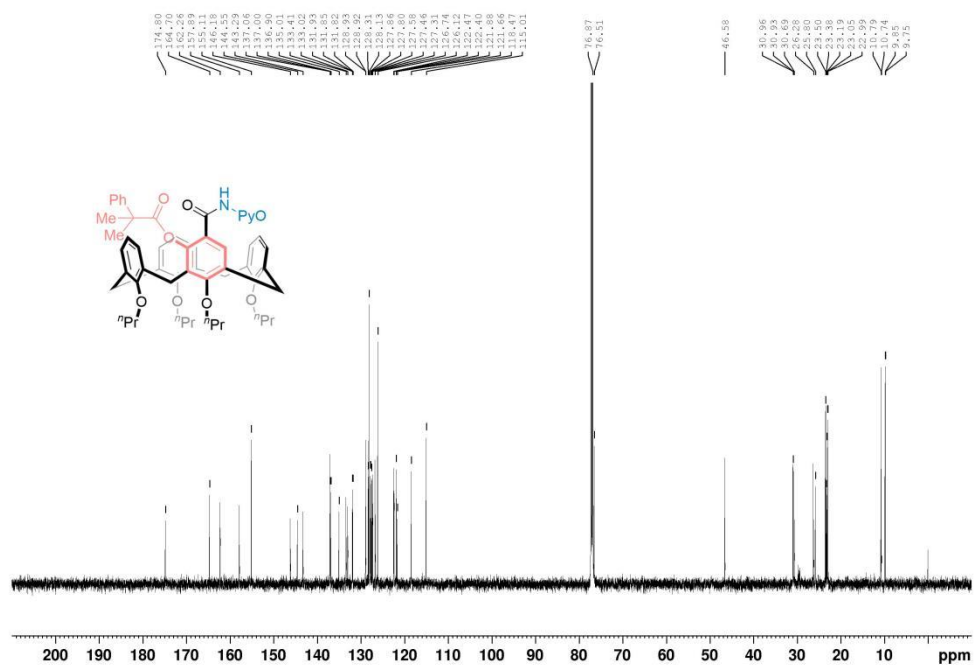

$^1\text{H}$  NMR (600 MHz,  $\text{CDCl}_3$ ), **3ag**

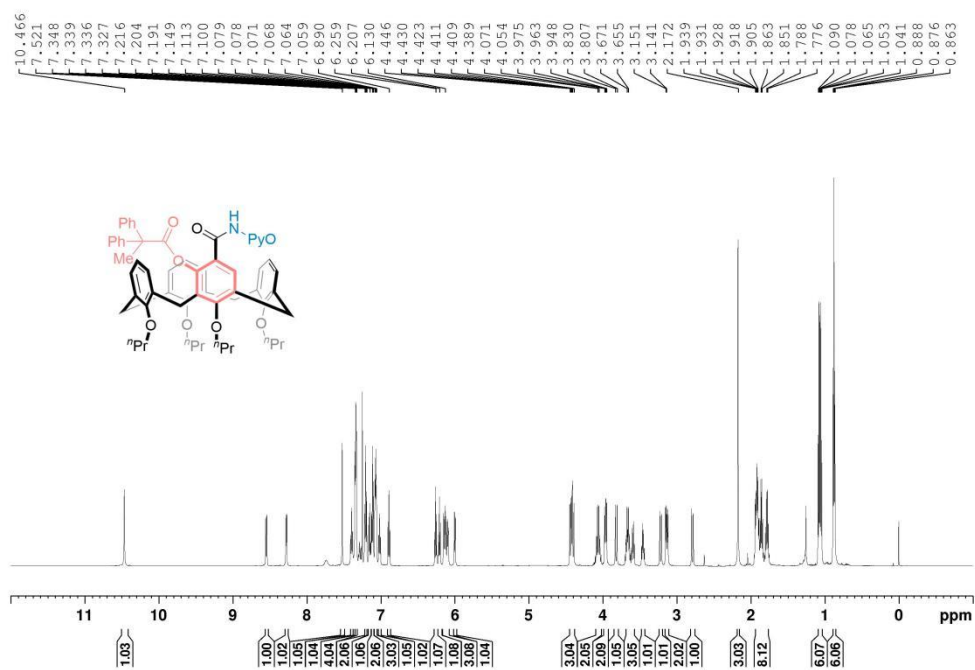

$^{13}\text{C}$  NMR (151 MHz,  $\text{CDCl}_3$ ), **3ag**

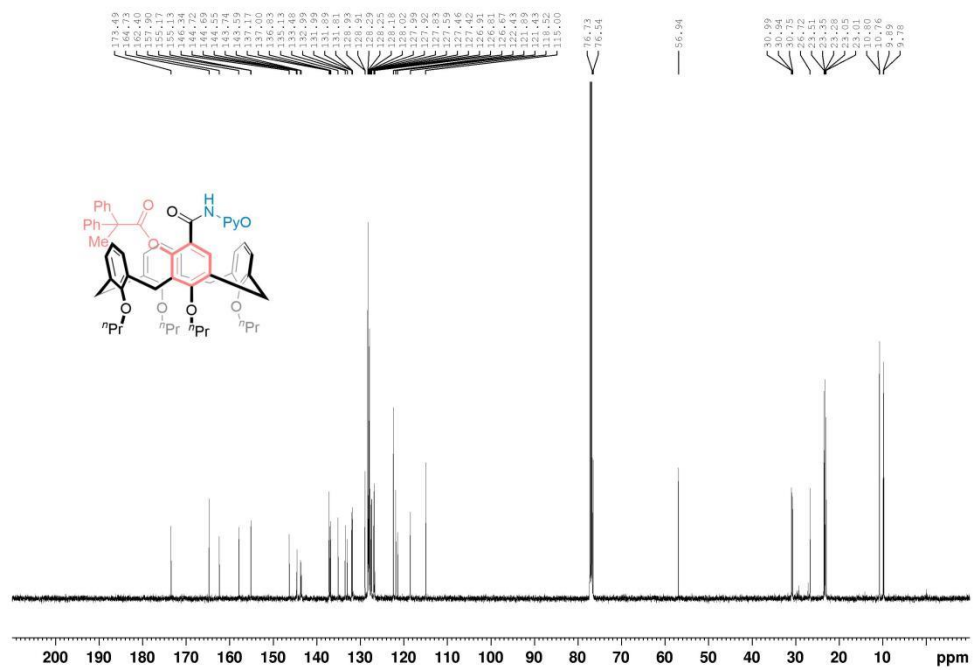

$^1\text{H}$  NMR (600 MHz,  $\text{CDCl}_3$ ), **3ah**

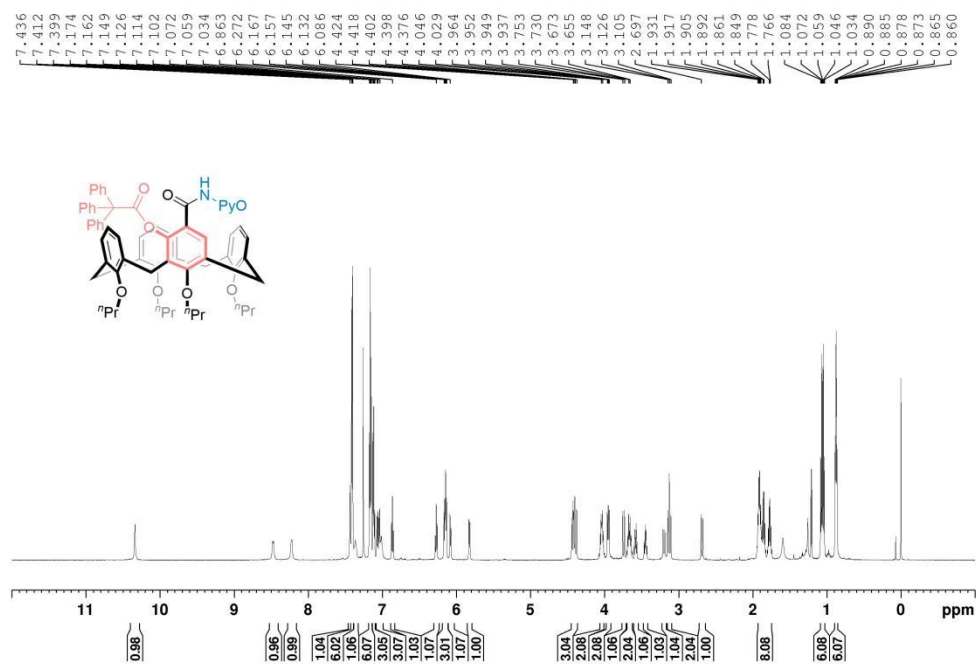

$^{13}\text{C}$  NMR (151 MHz,  $\text{CDCl}_3$ ), **3ah**

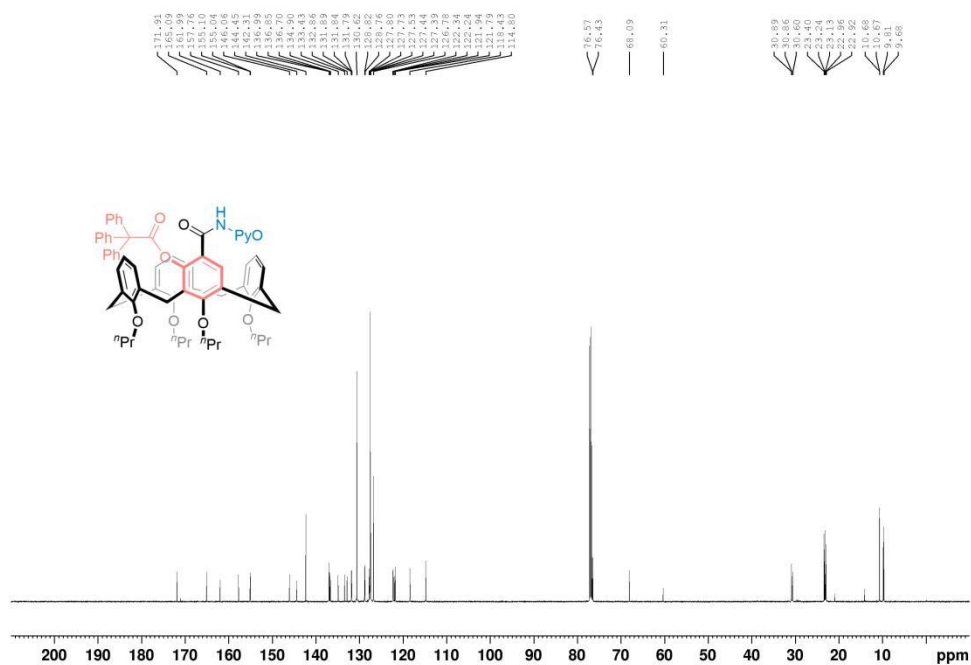

$^1\text{H}$  NMR (600 MHz,  $\text{CDCl}_3$ ), **3ai**

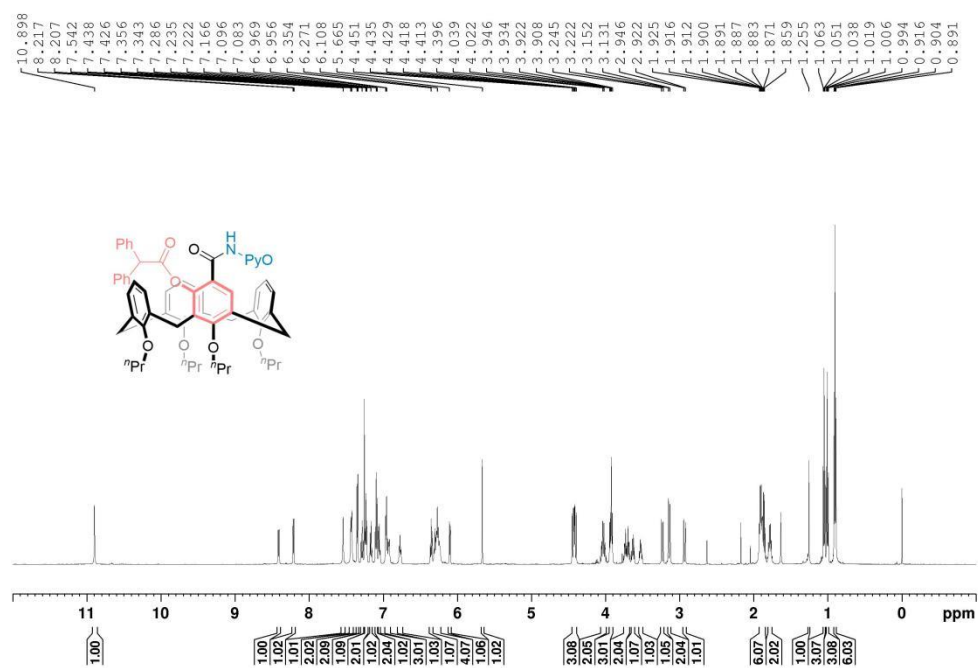

$^{13}\text{C}$  NMR (151 MHz,  $\text{CDCl}_3$ ), **3ai**

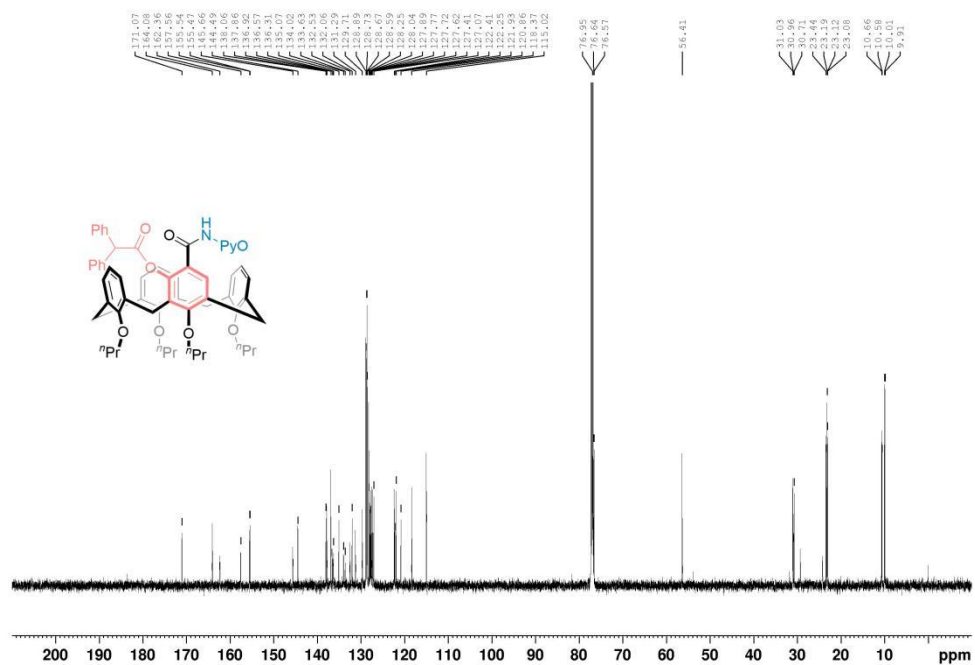



$^1\text{H}$  NMR (600 MHz,  $\text{CDCl}_3$ ), **3aj**

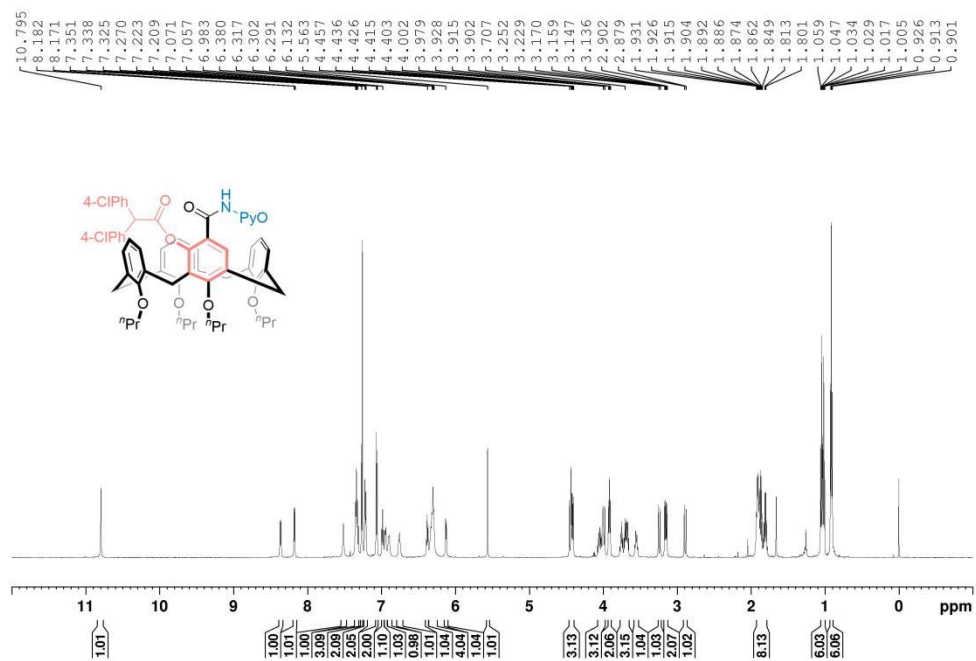

$^{13}\text{C}$  NMR (151 MHz,  $\text{CDCl}_3$ ), **3aj**

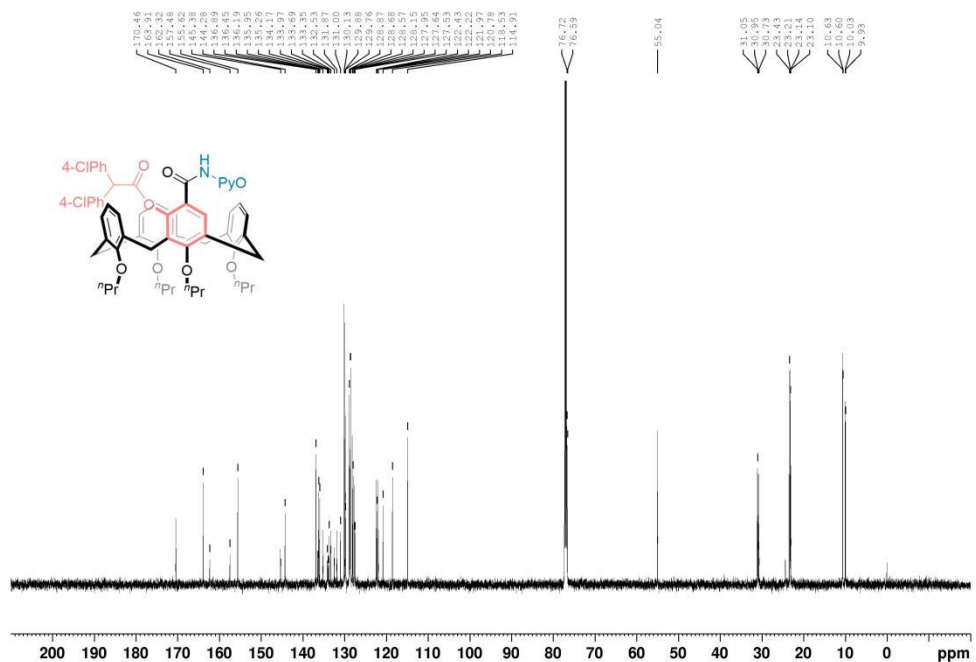

$^1\text{H}$  NMR (600 MHz,  $\text{CDCl}_3$ ), **3ak**

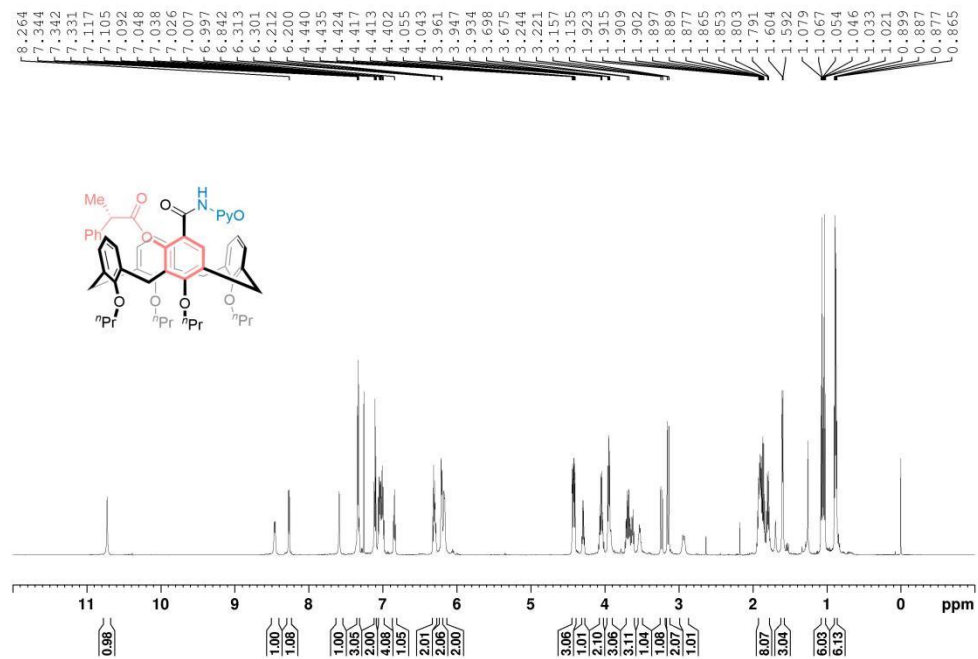

$^{13}\text{C}$  NMR (151 MHz,  $\text{CDCl}_3$ ), **3ak**

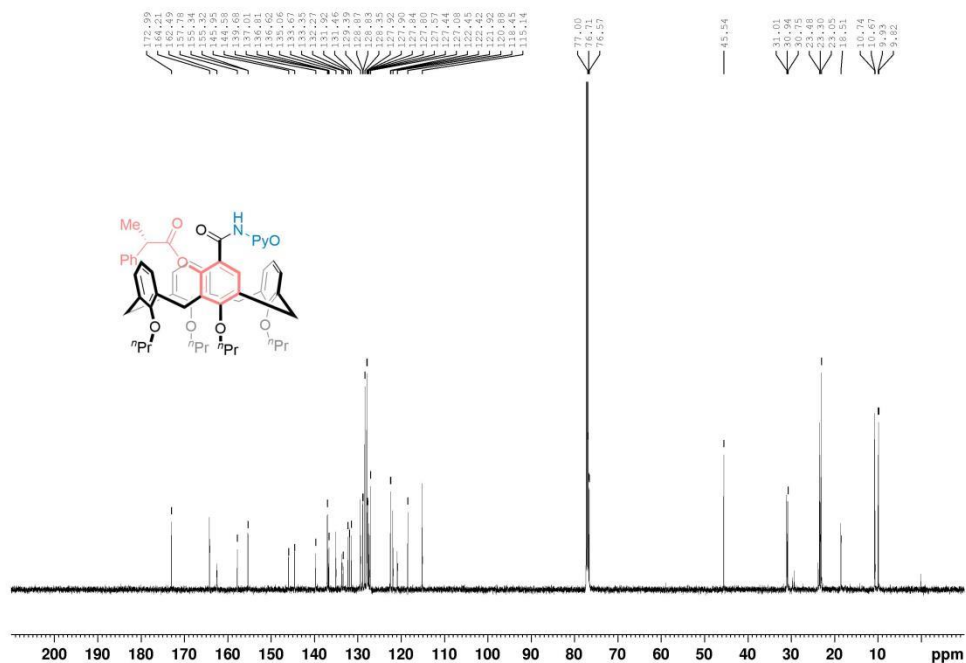

$^1\text{H}$  NMR (600 MHz,  $\text{CDCl}_3$ ), **3al**

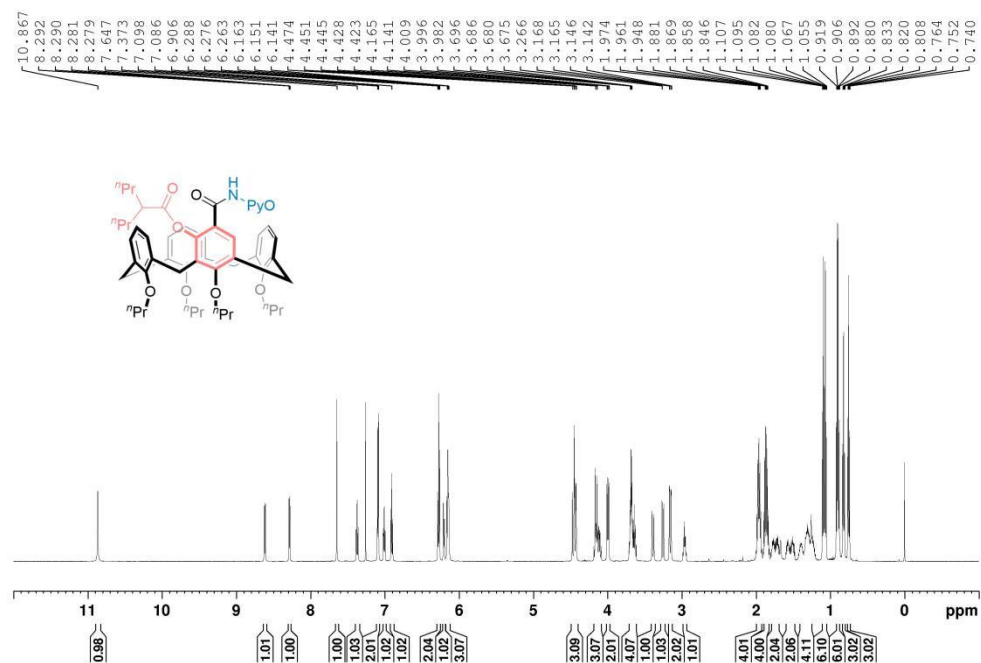

$^{13}\text{C}$  NMR (151 MHz,  $\text{CDCl}_3$ ), **3al**

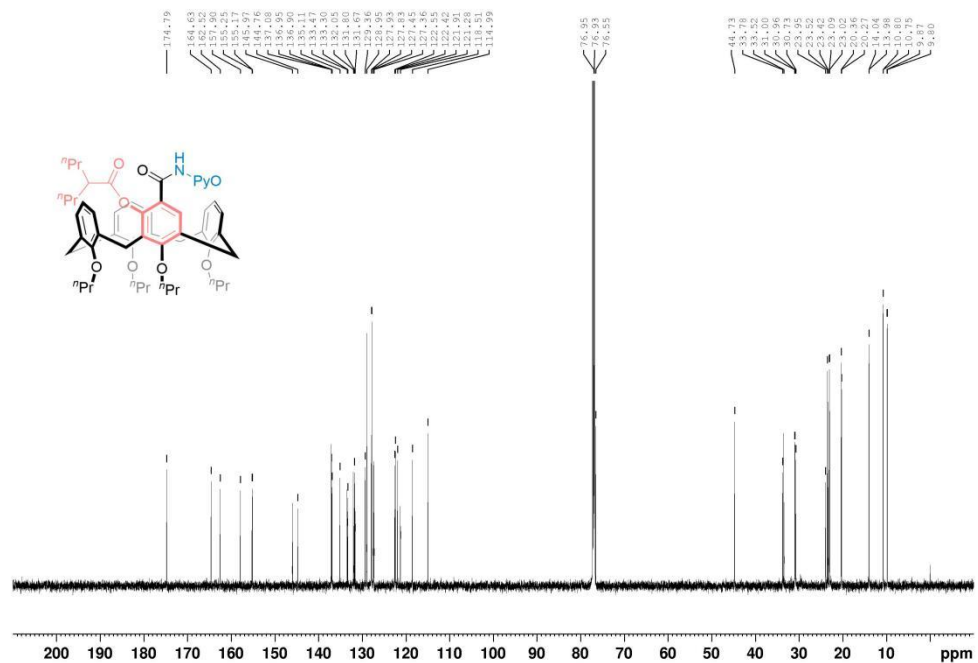

$^1\text{H}$  NMR (600 MHz,  $\text{CDCl}_3$ ), **3am**

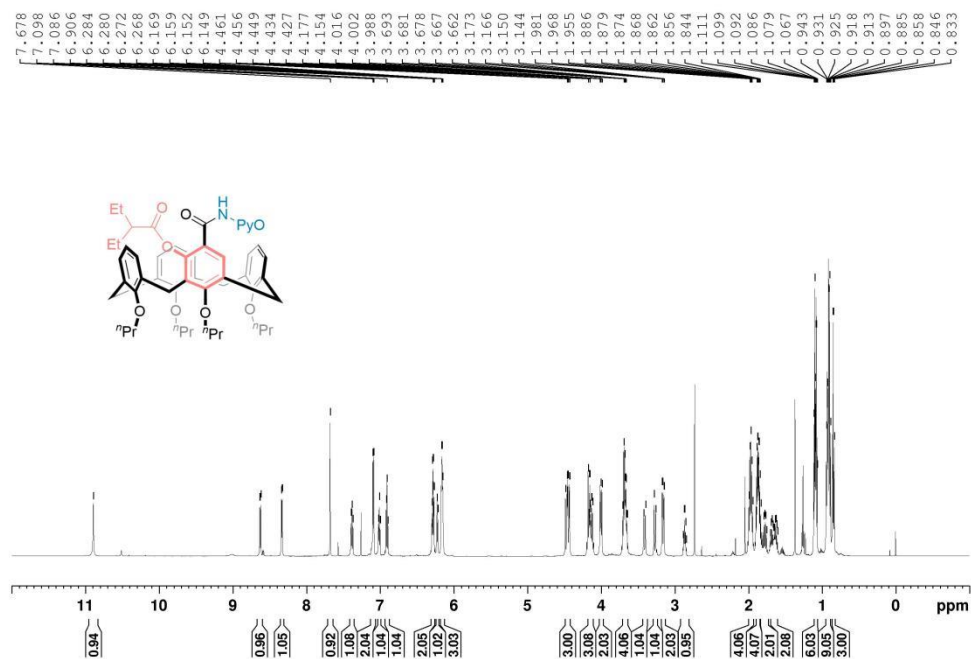

$^{13}\text{C}$  NMR (151 MHz,  $\text{CDCl}_3$ ), **3am**

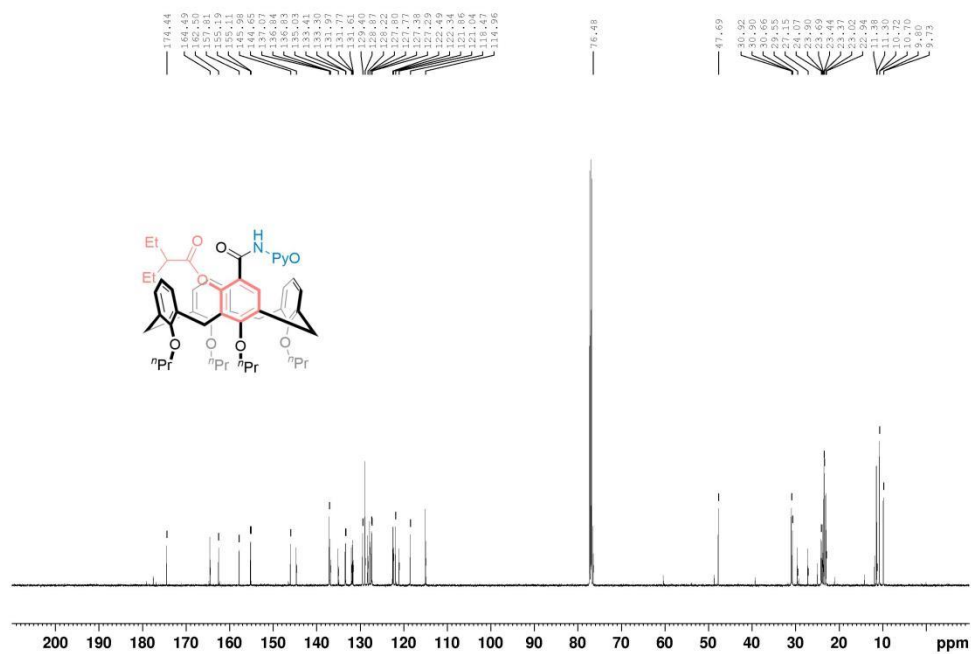

$^1\text{H}$  NMR (600 MHz,  $\text{CDCl}_3$ ), **3an**

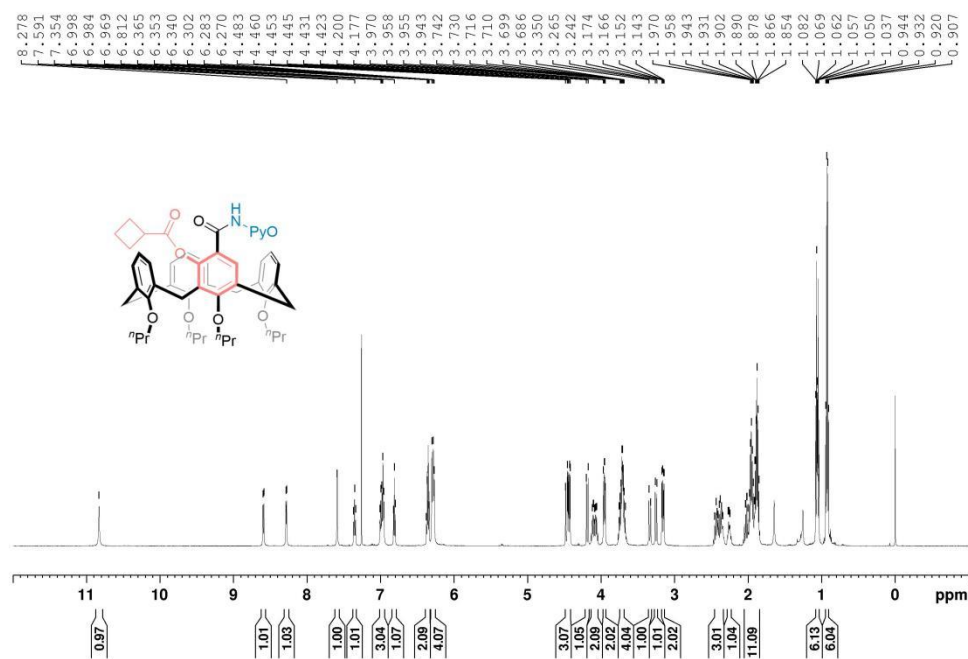

$^{13}\text{C}$  NMR (151 MHz,  $\text{CDCl}_3$ ), **3an**

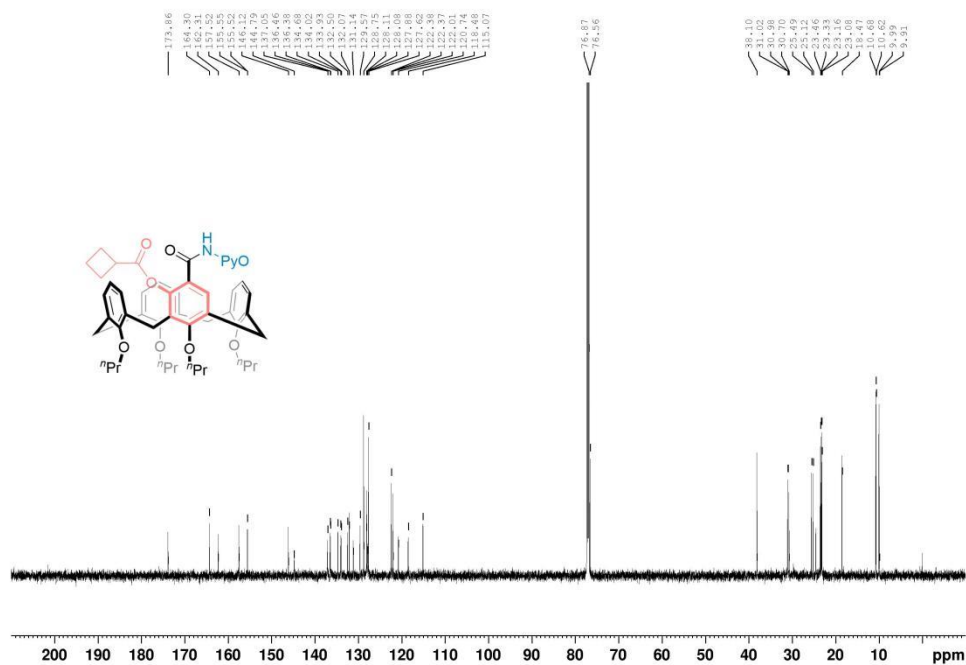



$^1\text{H}$  NMR (600 MHz,  $\text{CDCl}_3$ ), **3ap**

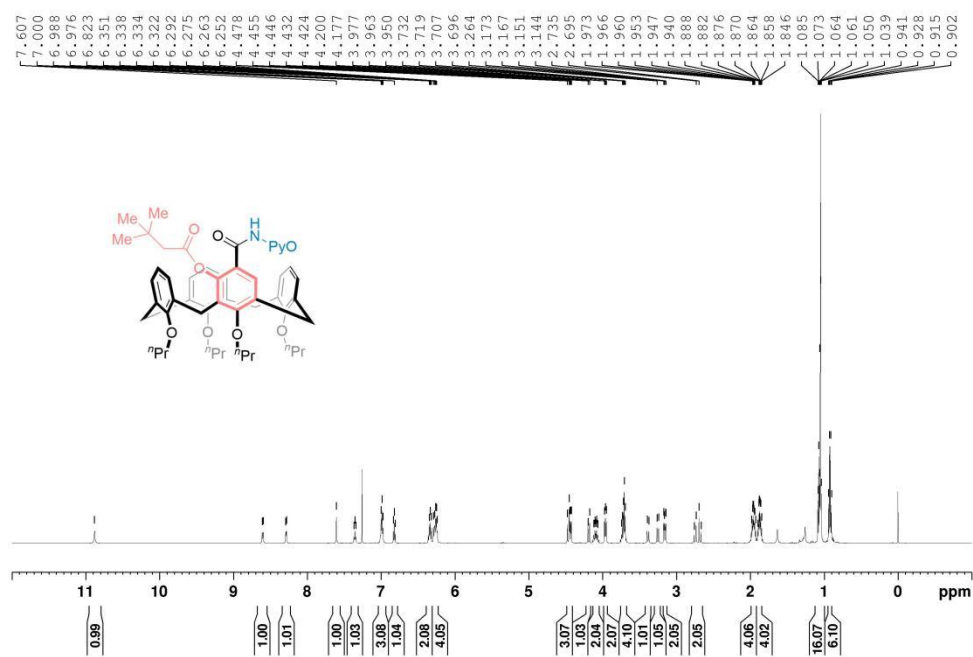

$^{13}\text{C}$  NMR (151 MHz,  $\text{CDCl}_3$ ), **3ap**

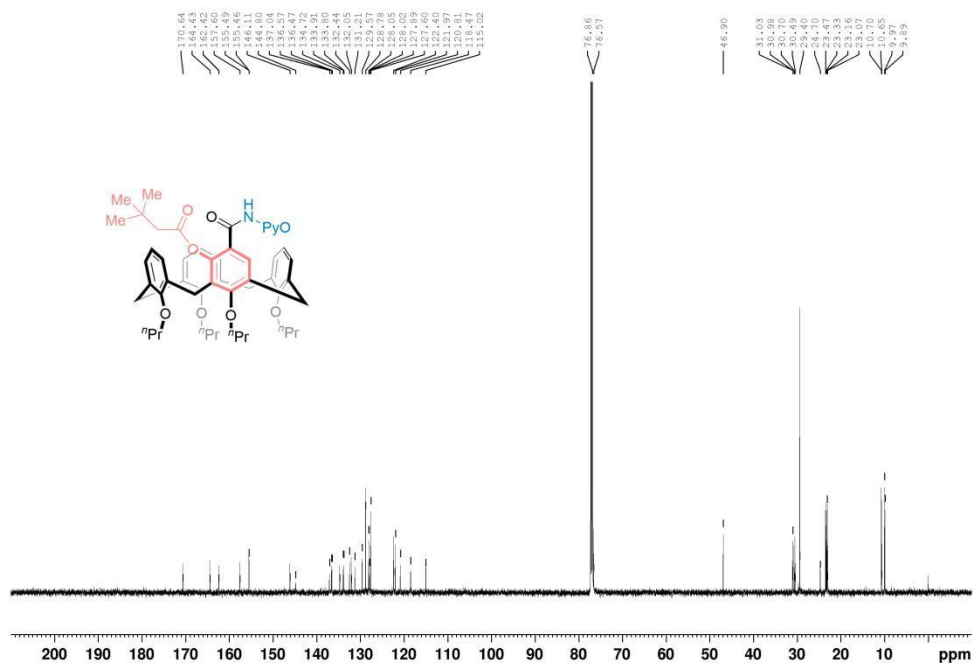

$^1\text{H}$  NMR (600 MHz,  $\text{CDCl}_3$ ), **3aq**

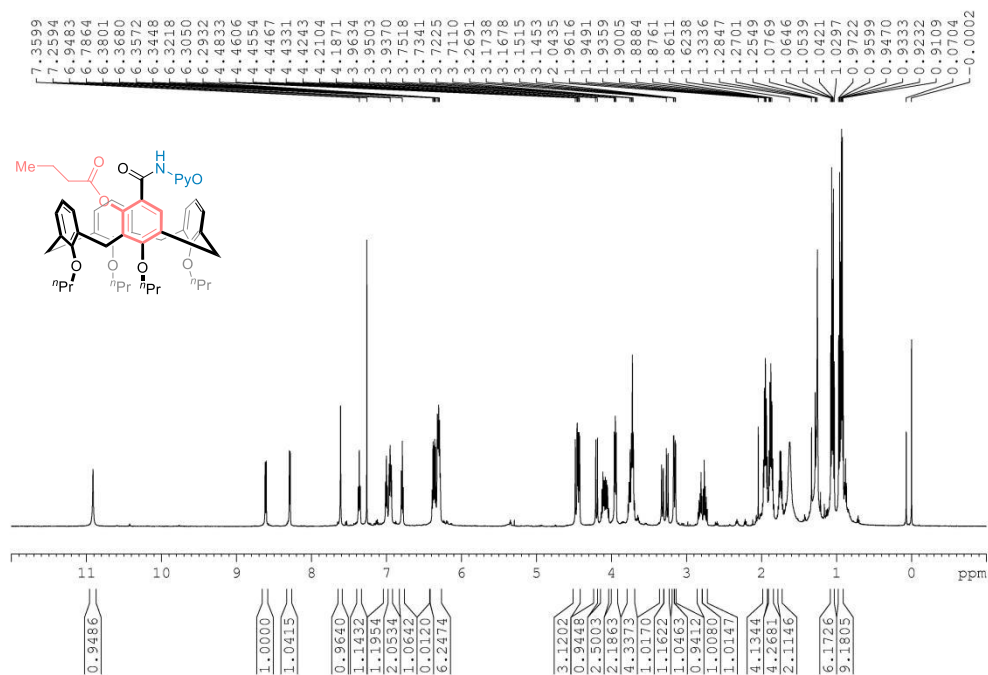

$^{13}\text{C}$  NMR (151 MHz,  $\text{CDCl}_3$ ), **3aq**

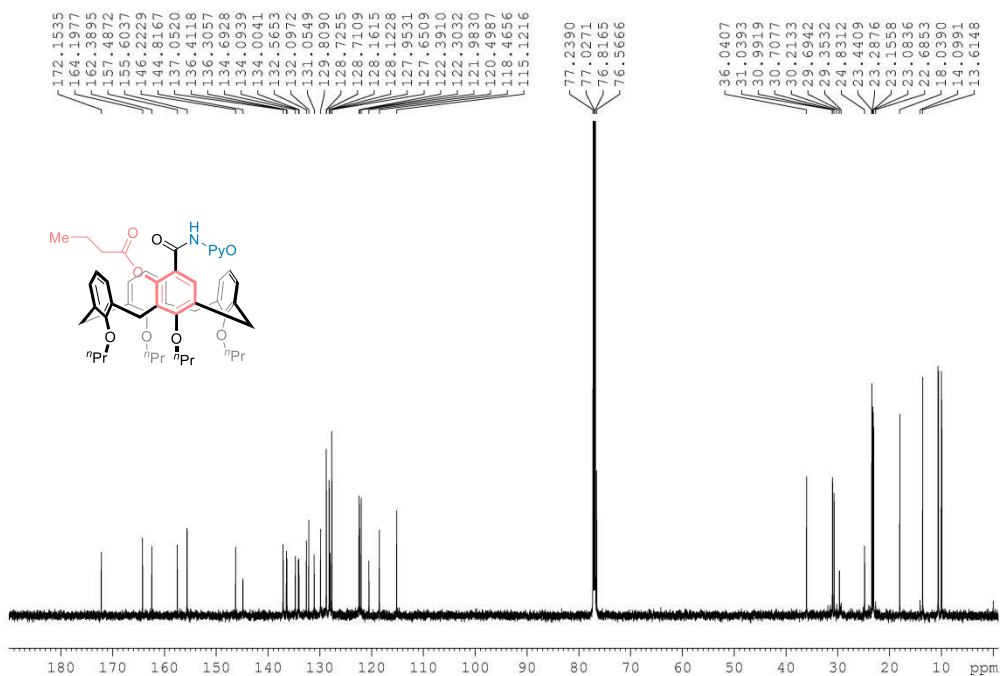





$^1\text{H}$  NMR (600 MHz,  $\text{CDCl}_3$ ), **3as**

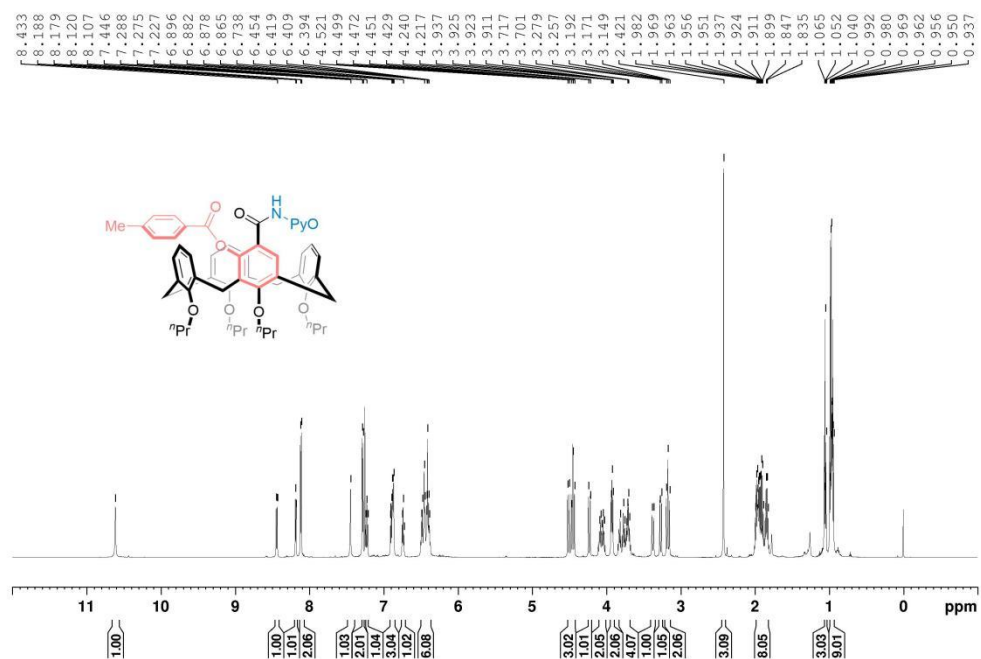

$^{13}\text{C}$  NMR (151 MHz,  $\text{CDCl}_3$ ), **3as**

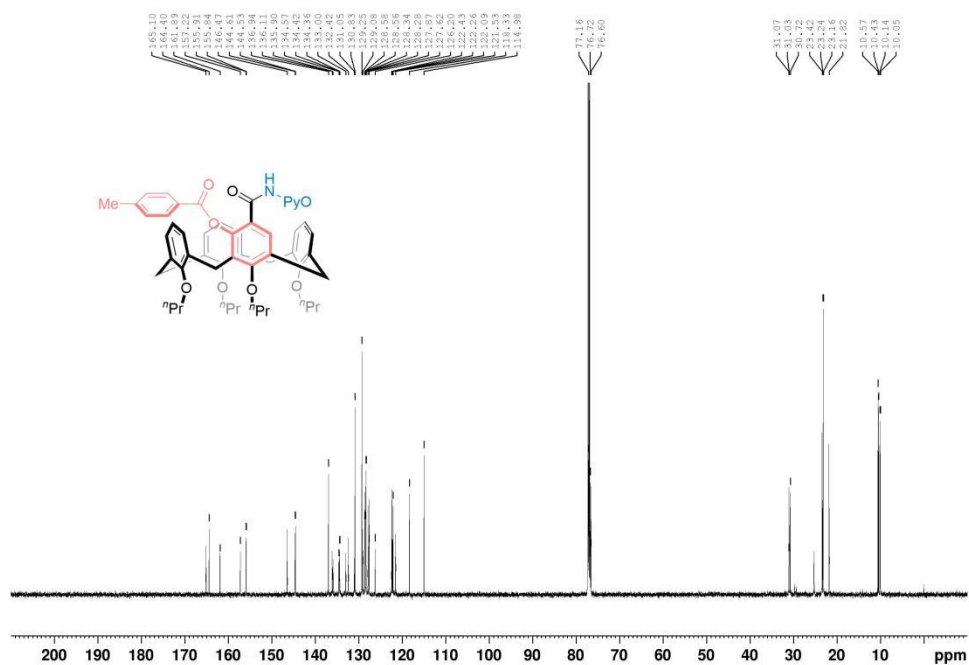

$^1\text{H}$  NMR (600 MHz,  $\text{CDCl}_3$ ), **3at**

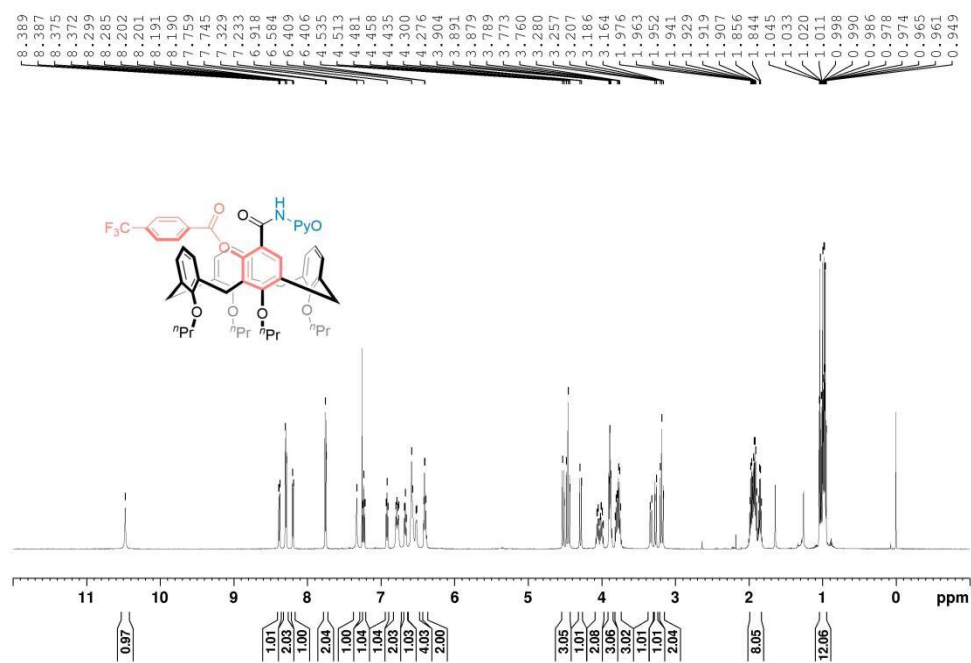

$^{13}\text{C}$  NMR (151 MHz,  $\text{CDCl}_3$ ), **3at**

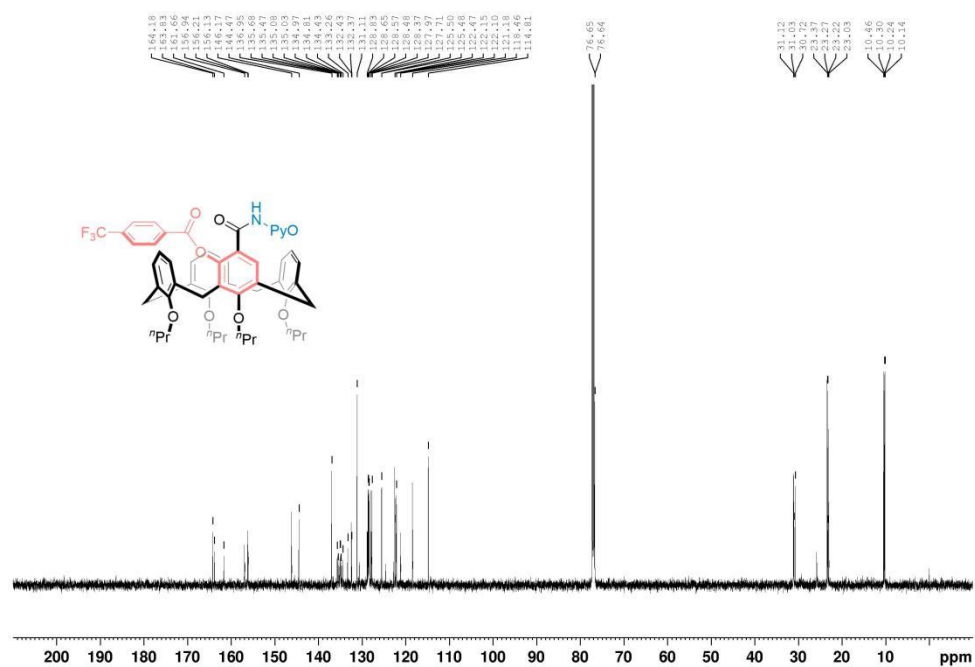

$^{19}\text{F}$  NMR (565 MHz,  $\text{CDCl}_3$ ), **3at**

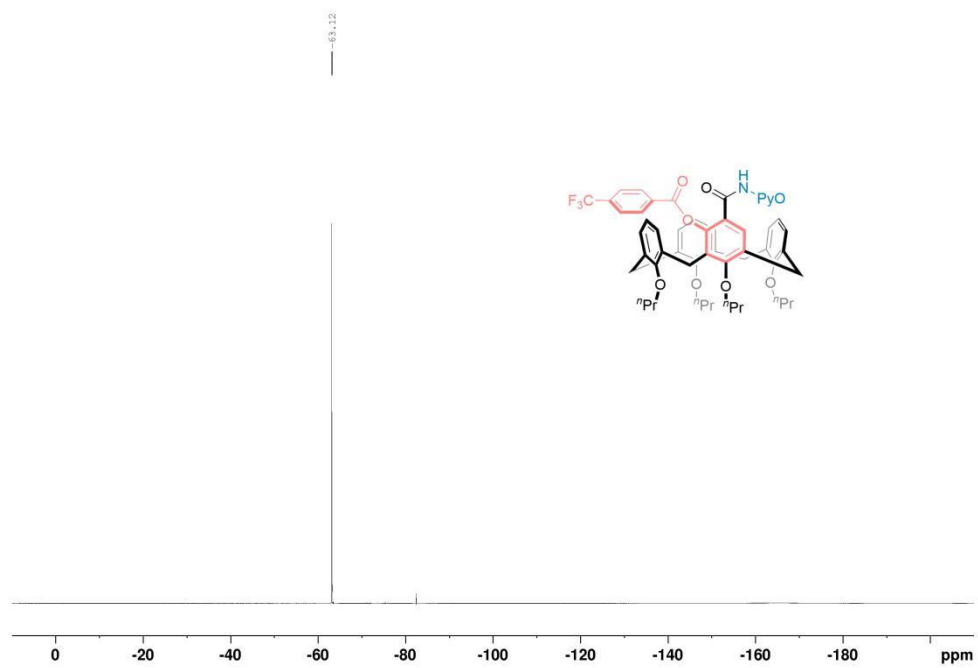

$^1\text{H}$  NMR (600 MHz,  $\text{CDCl}_3$ ), **3au**

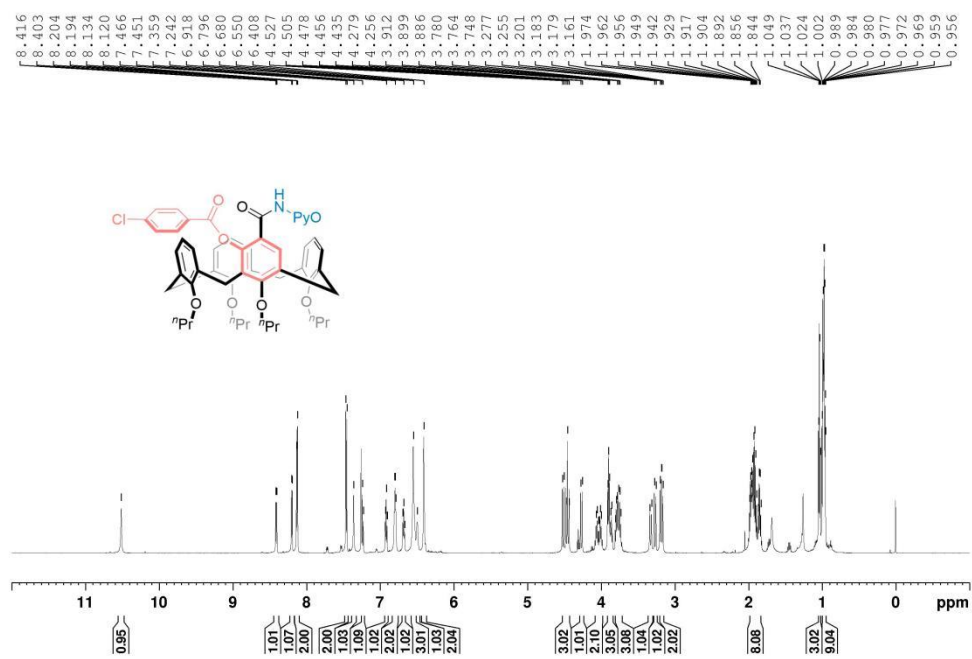

$^{13}\text{C}$  NMR (151 MHz,  $\text{CDCl}_3$ ), **3au**

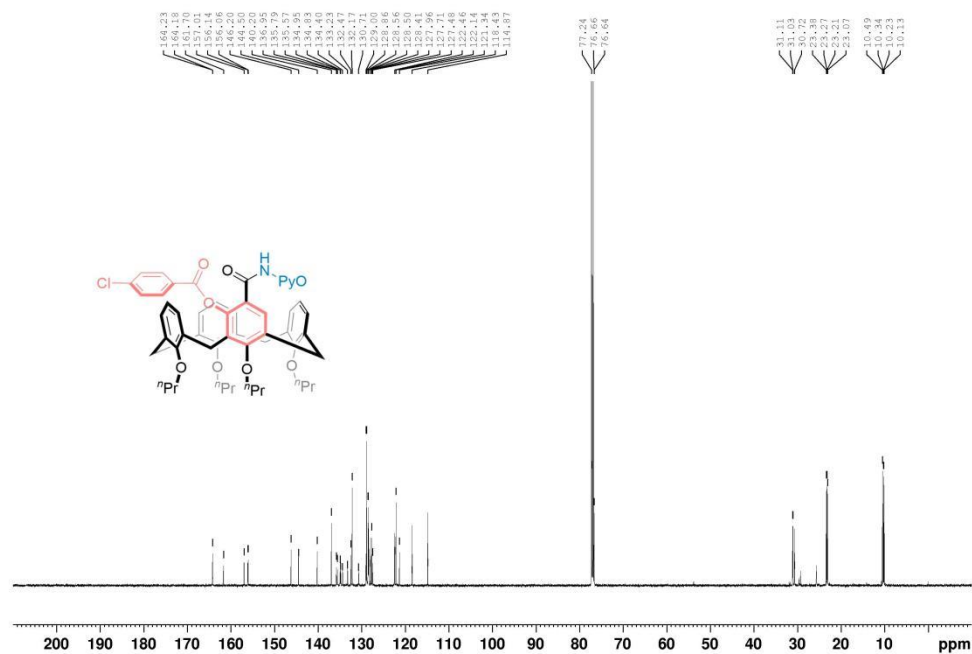

$^1\text{H}$  NMR (600 MHz,  $\text{CDCl}_3$ ), **3av**

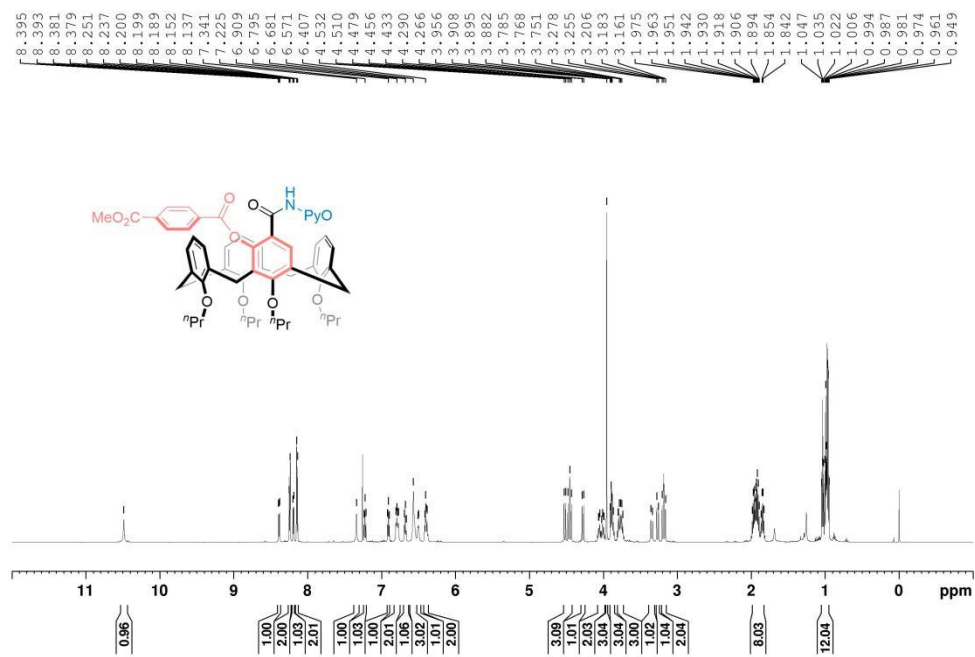

$^{13}\text{C}$  NMR (151 MHz,  $\text{CDCl}_3$ ), **3av**

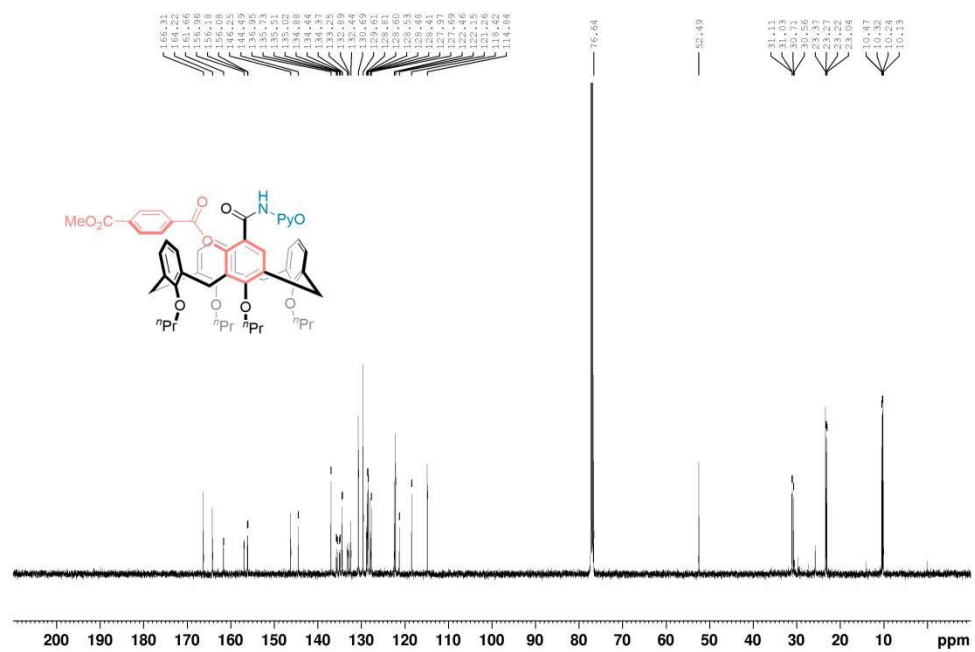

$^1\text{H}$  NMR (600 MHz,  $\text{CDCl}_3$ ), **3aw**

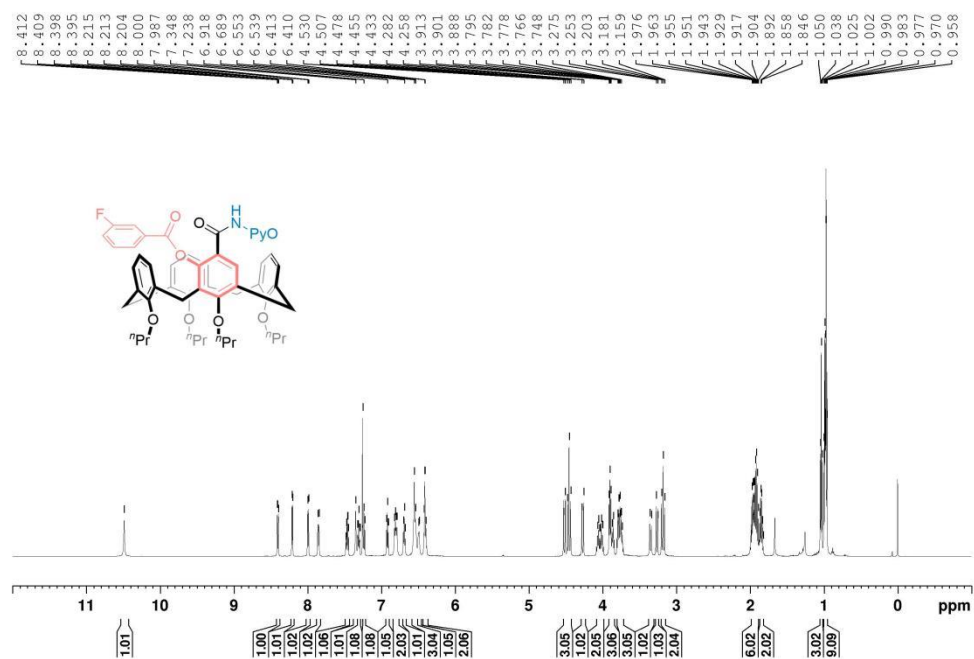

$^{13}\text{C}$  NMR (151 MHz,  $\text{CDCl}_3$ ), **3aw**

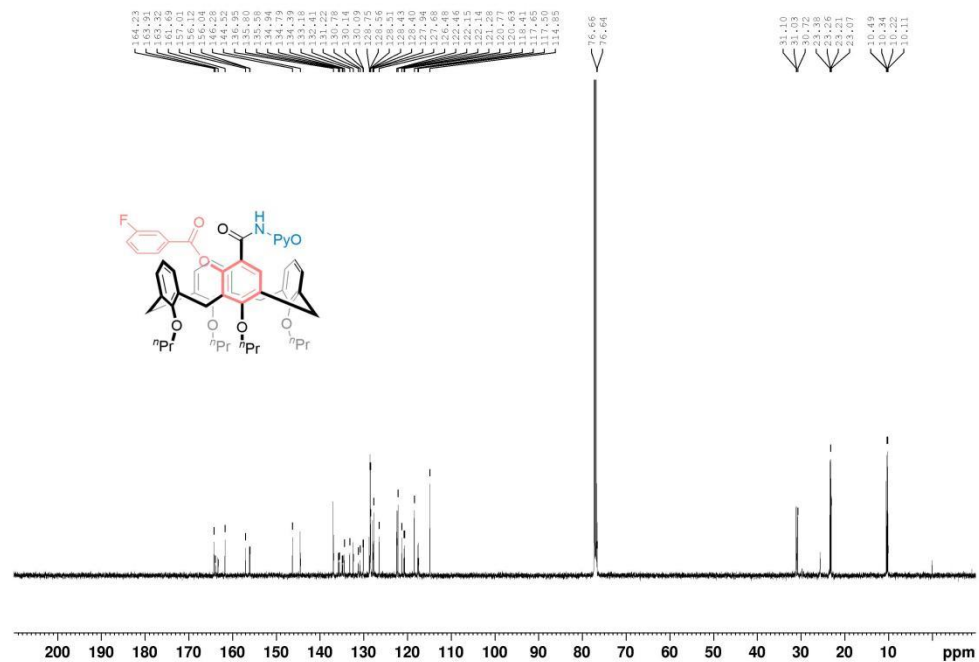

$^{19}\text{F}$  NMR (565 MHz,  $\text{CDCl}_3$ ), **3aw**

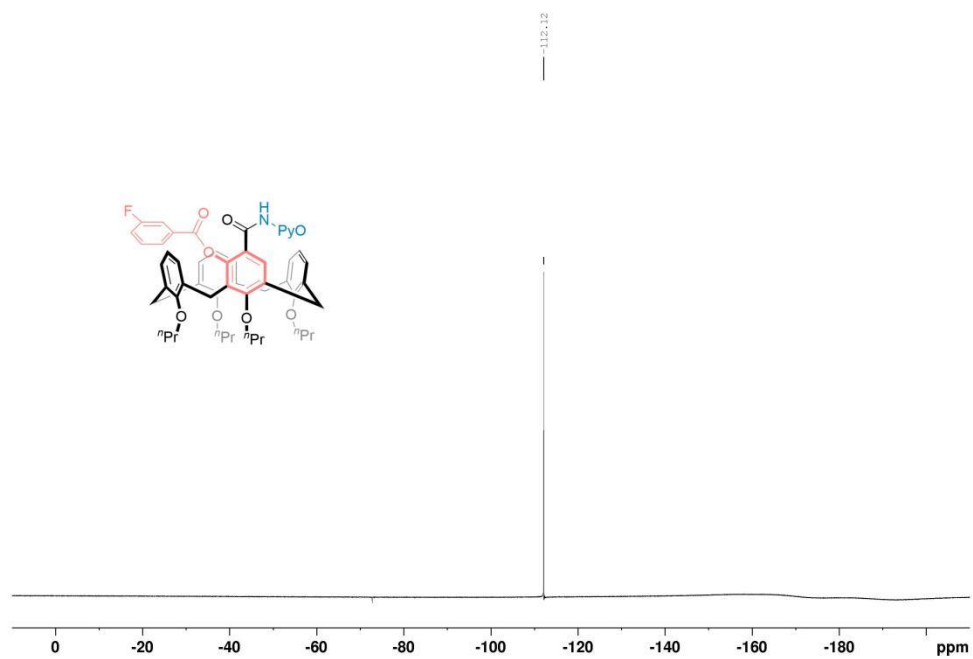



$^1\text{H}$  NMR (600 MHz,  $\text{CDCl}_3$ ), **3ax**

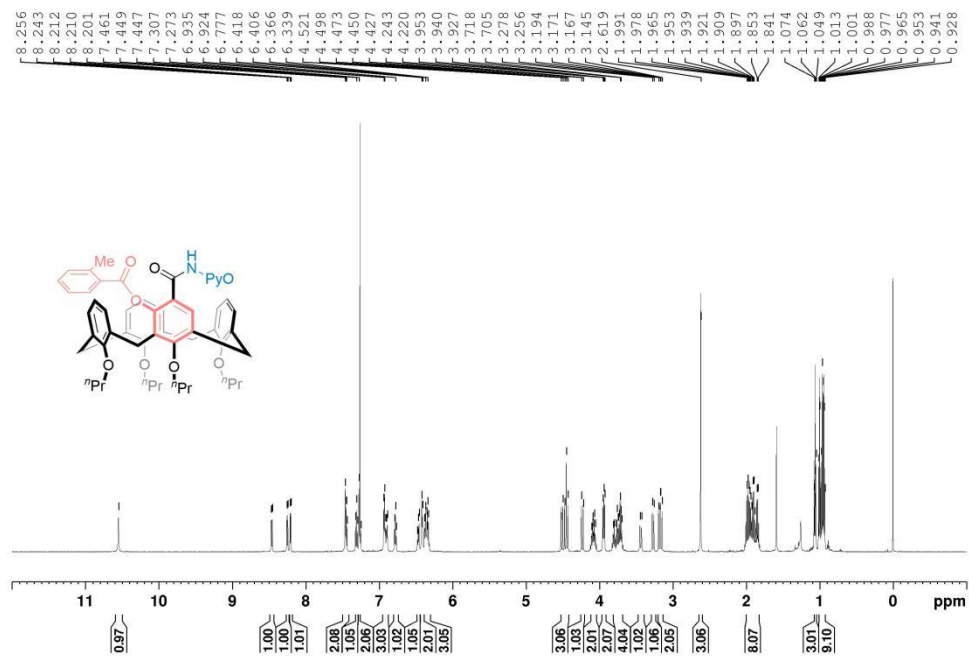

$^{13}\text{C}$  NMR (151 MHz,  $\text{CDCl}_3$ ), **3ax**

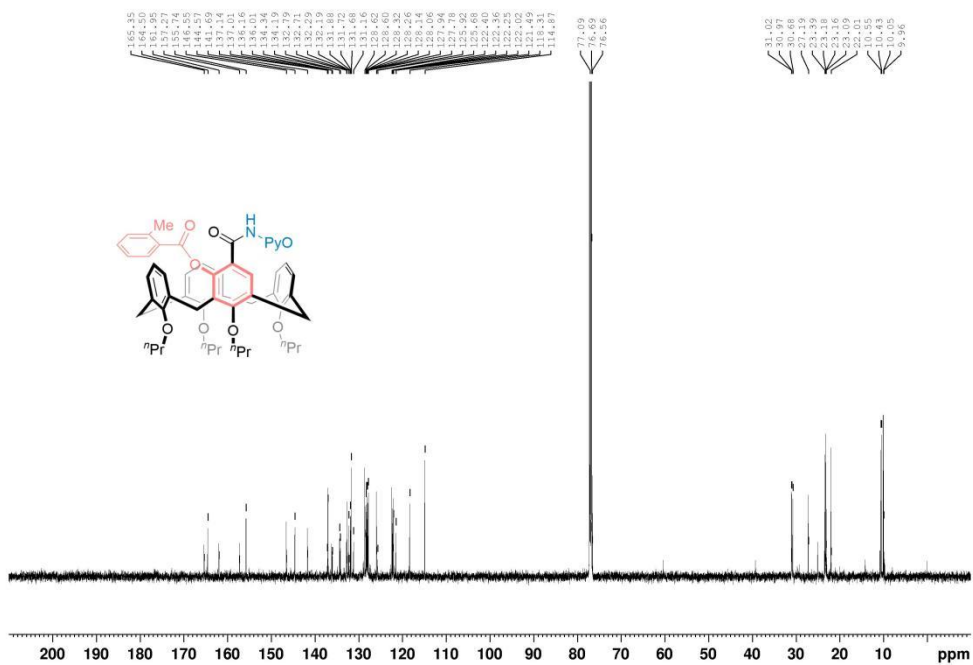

$^1\text{H}$  NMR (600 MHz,  $\text{CDCl}_3$ ), **3ay**

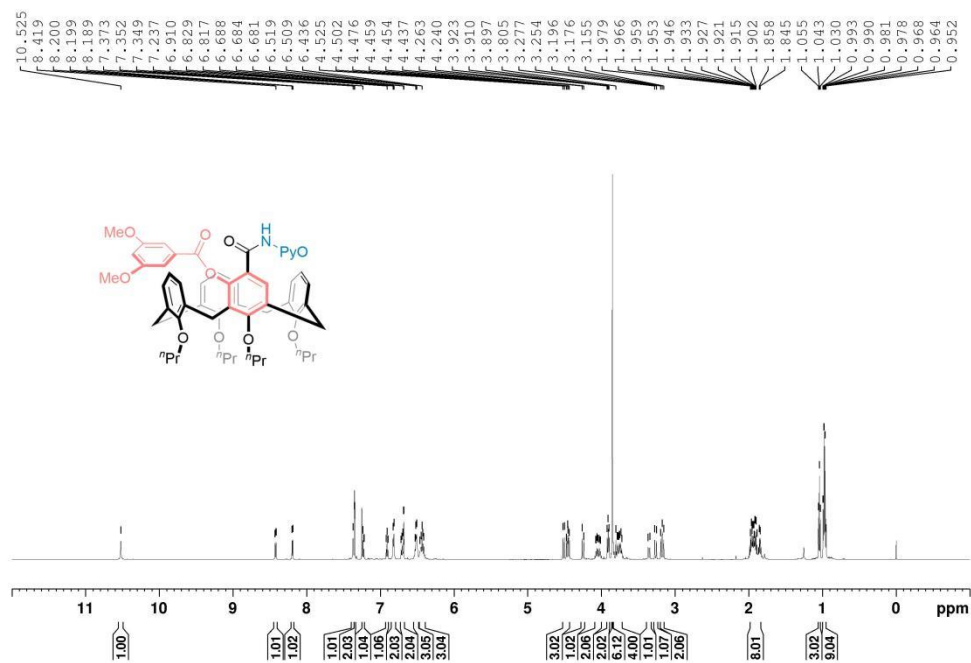

$^{13}\text{C}$  NMR (151 MHz,  $\text{CDCl}_3$ ), **3ay**

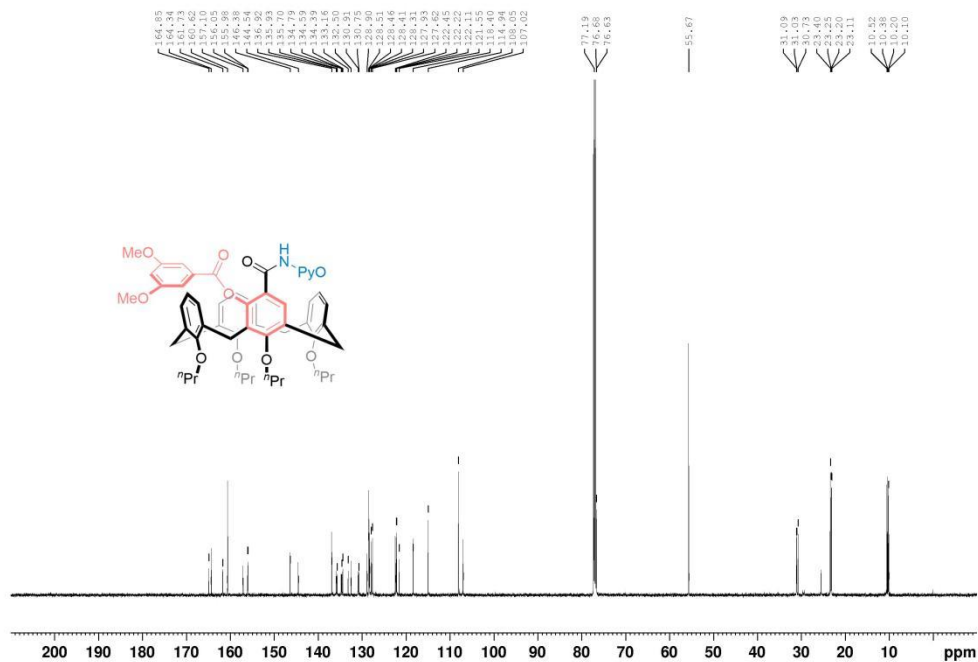

$^1\text{H}$  NMR (600 MHz,  $\text{CDCl}_3$ ), **3az**

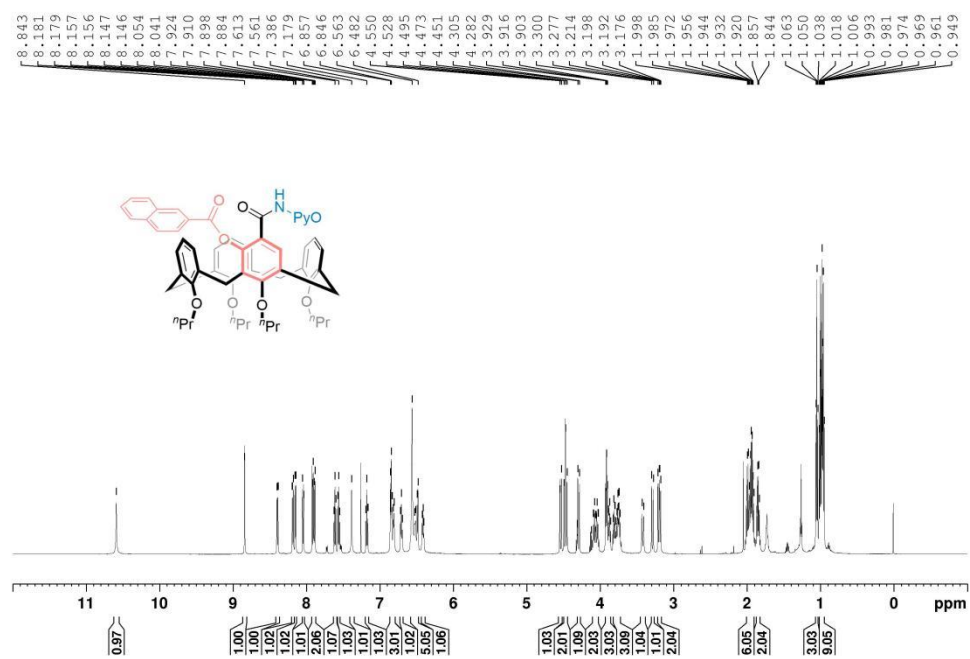

$^{13}\text{C}$  NMR (151 MHz,  $\text{CDCl}_3$ ), **3az**

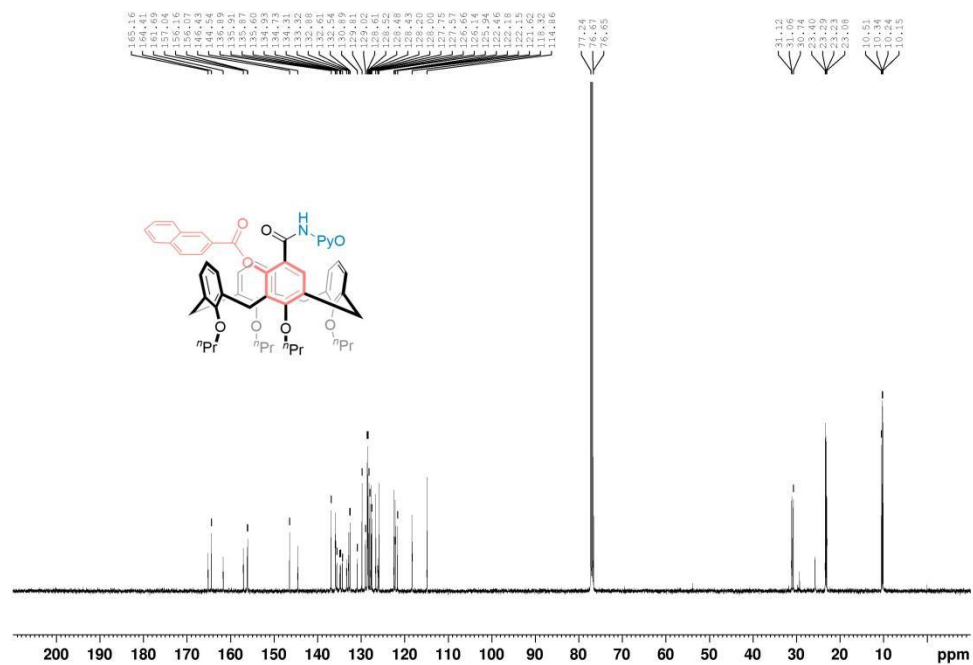

$^1\text{H}$  NMR (600 MHz,  $\text{CDCl}_3$ ), **3ba**

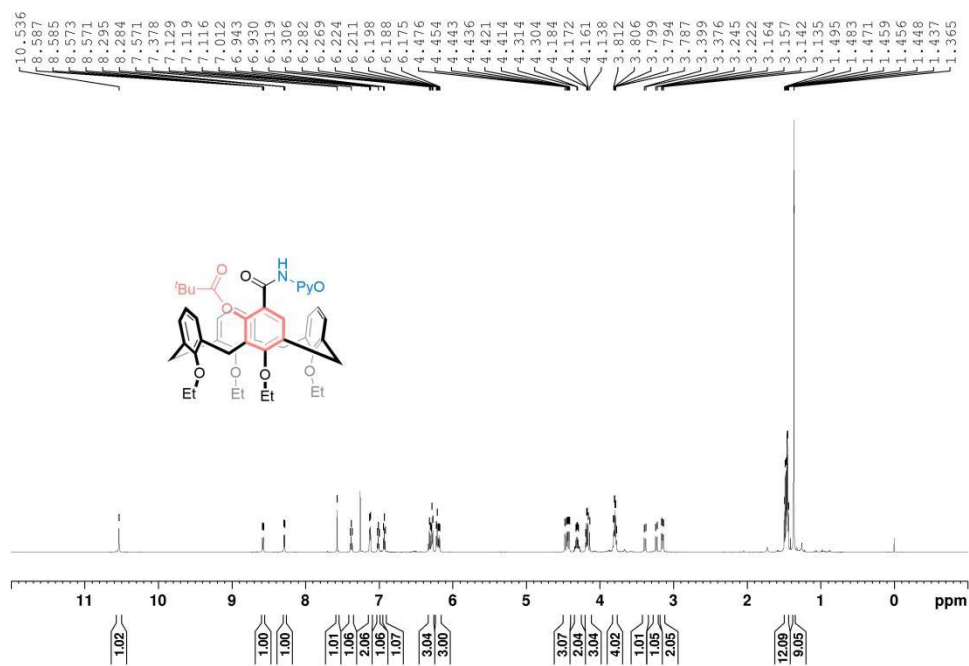

$^{13}\text{C}$  NMR (151 MHz,  $\text{CDCl}_3$ ), **3ba**

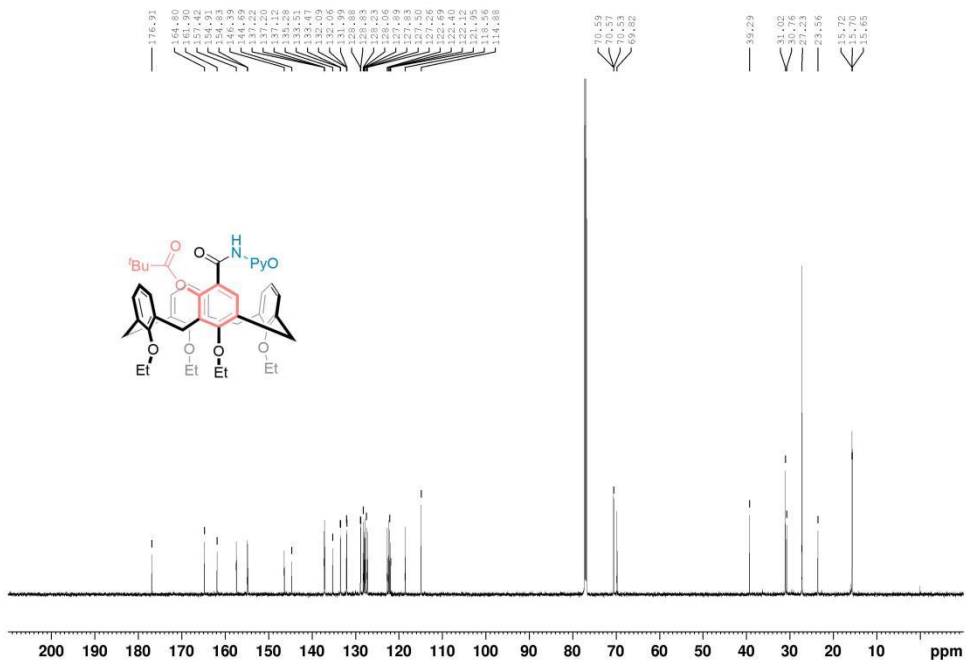

$^1\text{H}$  NMR (600 MHz,  $\text{CDCl}_3$ ), **3ca**

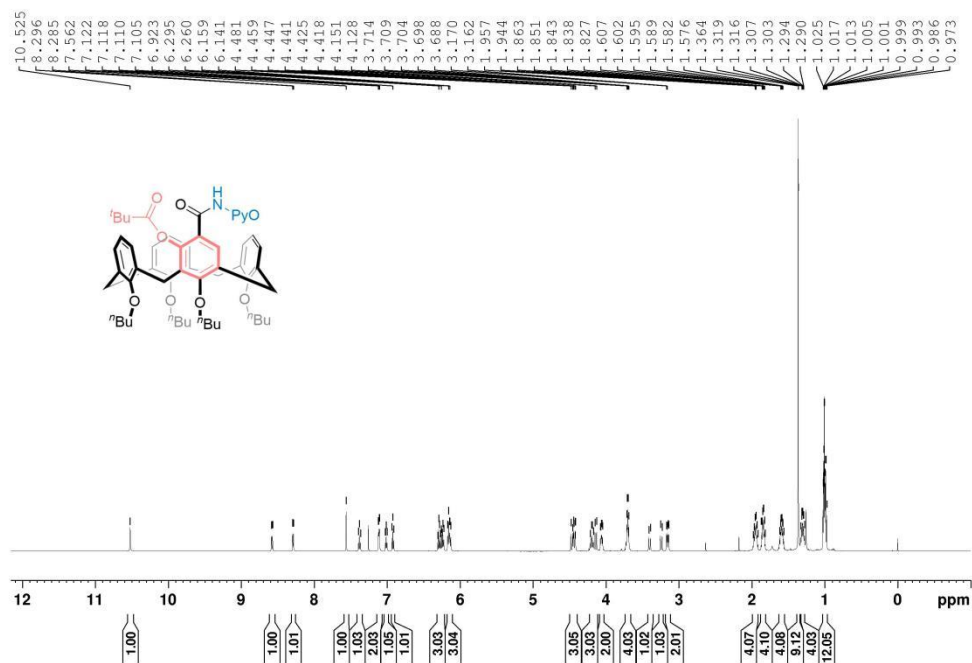

$^{13}\text{C}$  NMR (151 MHz,  $\text{CDCl}_3$ ), **3ca**

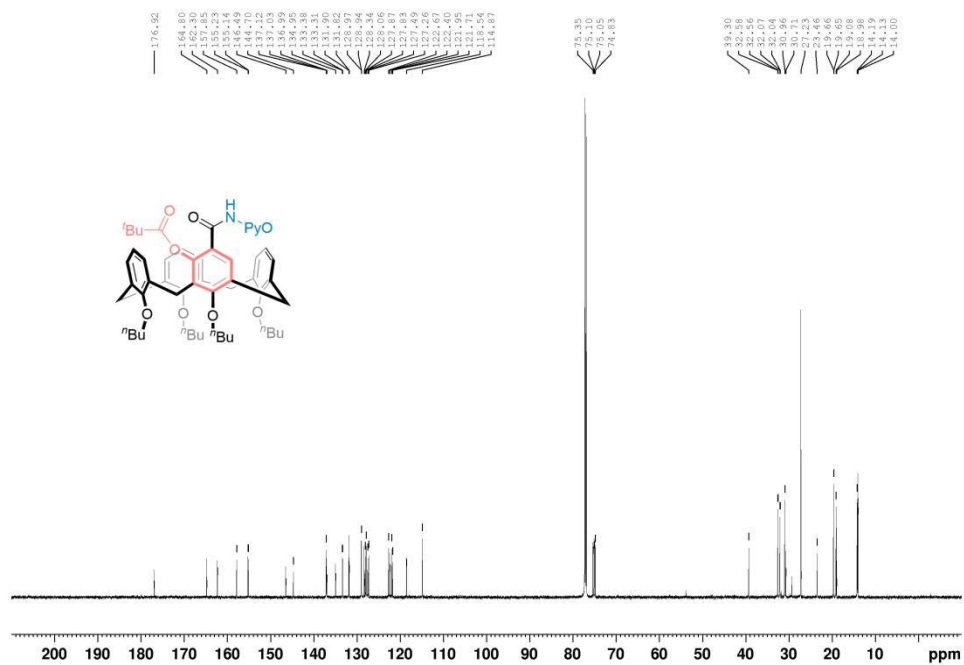

$^1\text{H}$  NMR (600 MHz,  $\text{CDCl}_3$ ), **4**

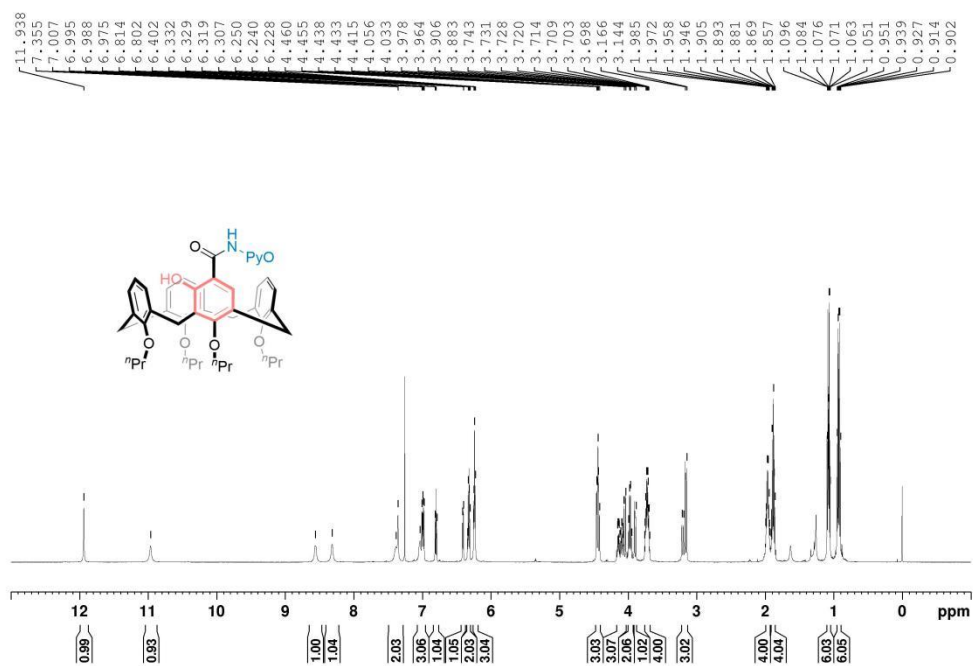

$^{13}\text{C}$  NMR (151 MHz,  $\text{CDCl}_3$ ), **4**

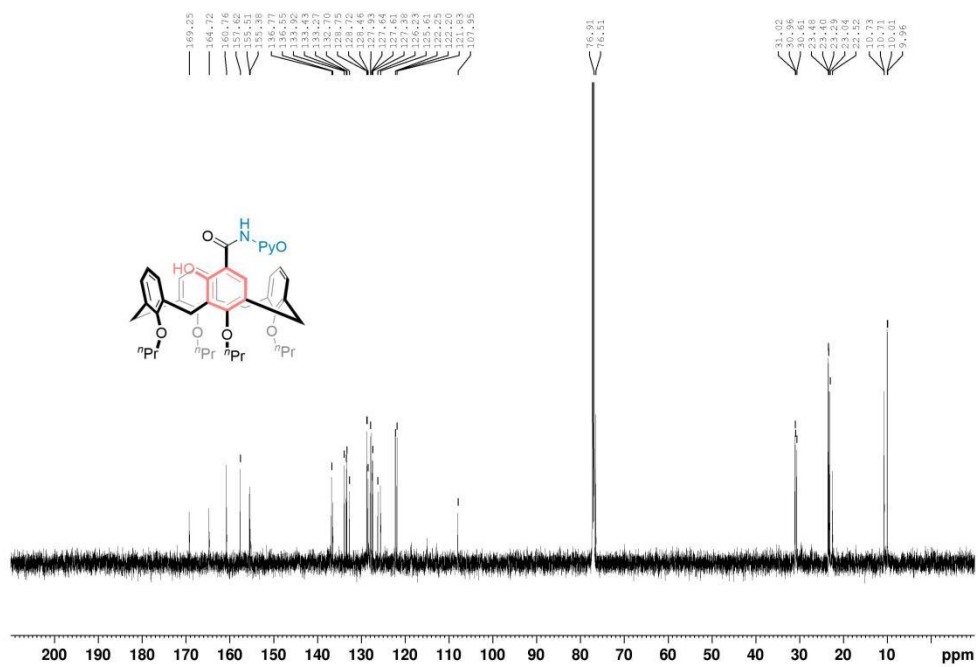

$^1\text{H}$  NMR (600 MHz,  $\text{CDCl}_3$ ), **6**

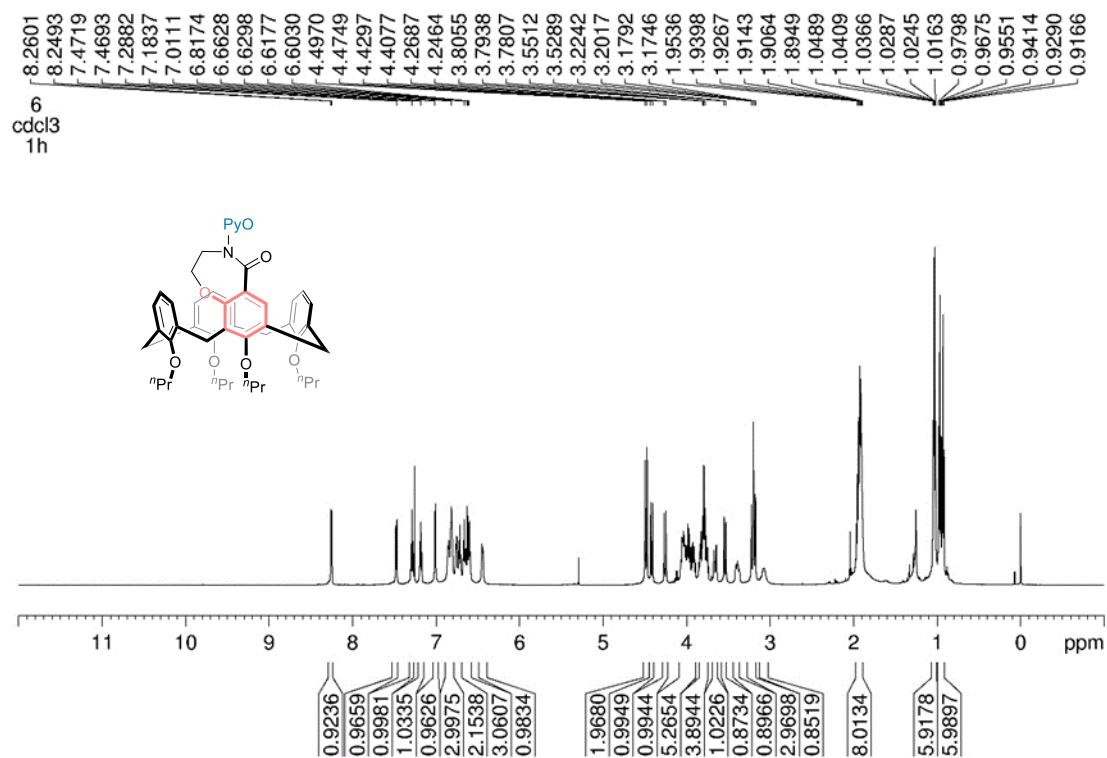

$^{13}\text{C}$  NMR (151 MHz,  $\text{CDCl}_3$ ), **6**

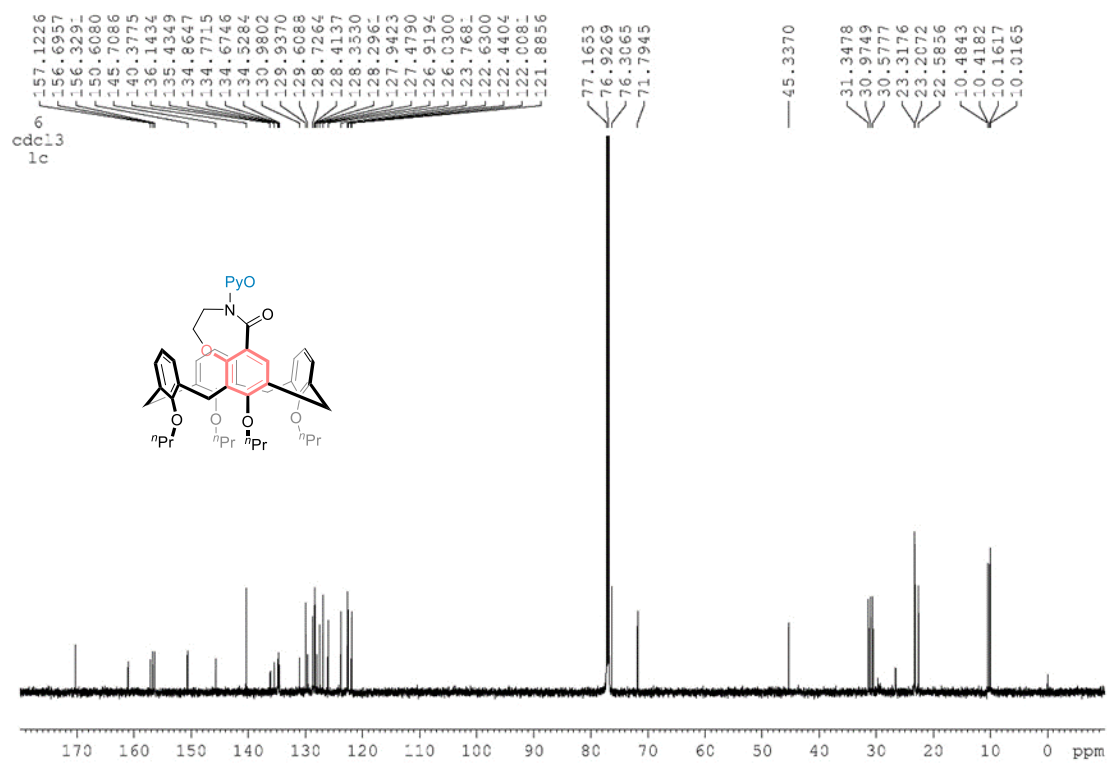

Supplement: d4gc02877e1.pdf [file d4gc02877e1.pdf]
